# Supplementary material for: Chemical consequences of pyrazole orientation in RuII complexes of unsymmetric quinoline–pyrazole ligands
Source: Royal Society of Chemistry journal article supplement (doi:10.1039/c6dt01070a), 2016-01-01
Supplement: c6dt01070a1.pdf [file c6dt01070a1.pdf]

## SUPPORTING INFORMATION

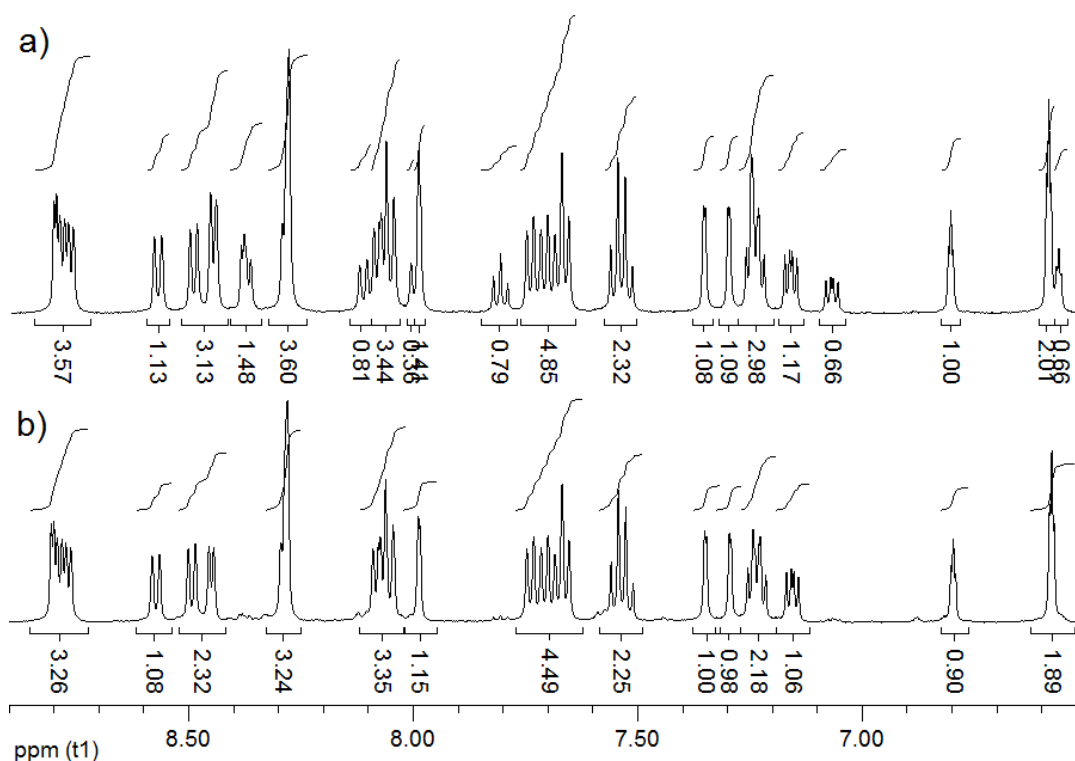

**Figure S1.**  $^1\text{H-NMR}$  spectra of (a) *mer/fac* mixture of  $[\text{Ru}(\text{Q1Pz})_3]^{2+}$  and (b) *mer*- $[\text{Ru}(\text{Q1Pz})_3]^{2+}$  isolated product after light illumination.

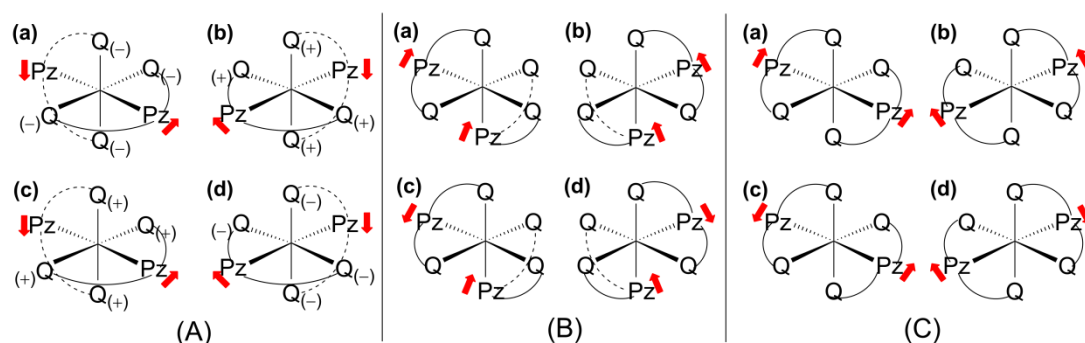

**Figure S2.** Illustrations of different stereoisomers for which optimized total energies have been calculated (A, left) *meridional*, (B, centre) *cis-facial* and (C, right) *trans-facial* isomers. The red arrow indicates the plane and direction of the polarity of the pyrazole group. In (A) the subscript (+) and (-) indicate the sign of the dihedral angle between the *trans*-quinolines as defined in Figure S2 and the stereochemical labels for each isomer is (a) C-S<sub>a</sub>, (b) A-R<sub>a</sub>, (c) C-R<sub>a</sub> and (d) A-S<sub>a</sub> respectively. No stereochemical labels have been assigned to the *fac* isomers.

**Table S1.** Calculated total energy (eV) of each calculated isomer of  $[\text{Ru}(\text{DQPz})_2]^{2+}$ , referenced to the lowest energy isomer of each complex. Isomers shown in Figure S2.

|     | <i>mer</i> - | <i>trans-fac</i> - | <i>cis-fac</i> - |
|-----|--------------|--------------------|------------------|
| (a) | 0            | 0                  | 0                |
| (b) | 0            | 0.000001           | 0.01             |
| (c) | 0.002        | 0.01               | 0.003            |
| (d) | 0.002        | 0.006              | 0.003            |

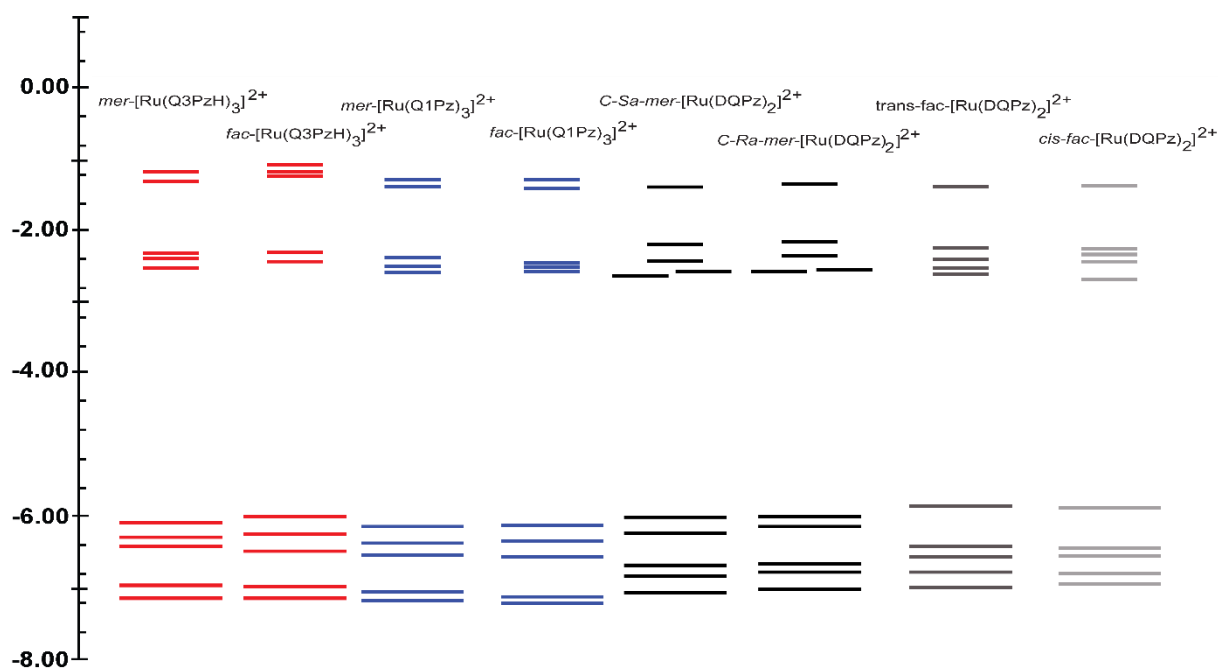

**Figure S3:** The first 5 HOMO and LUMOs of representative calculated complex isomers.

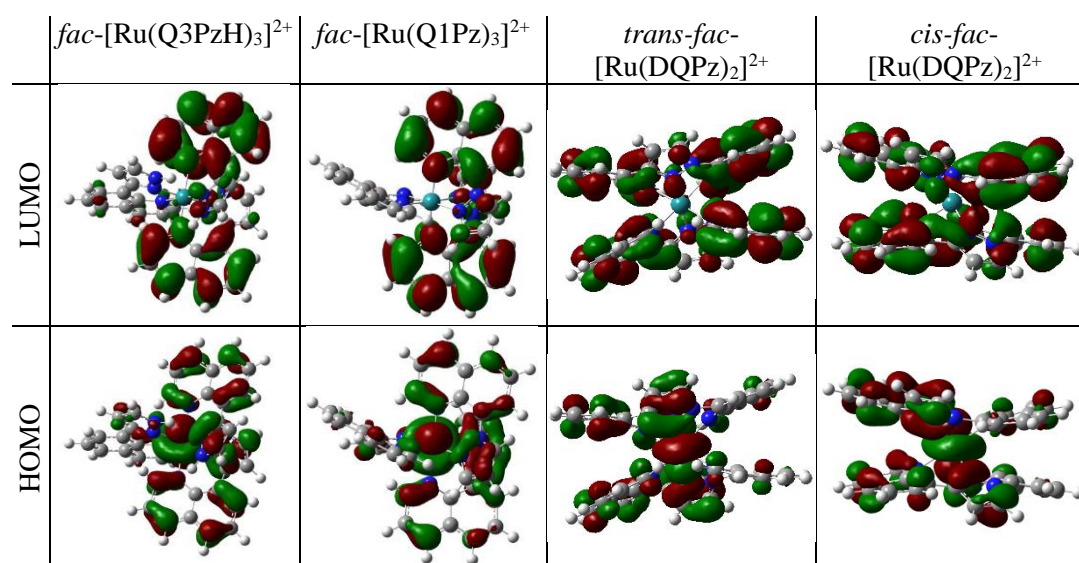

**Figure S4.** Frontier molecular orbitals of the *fac*-isomers of three complexes.

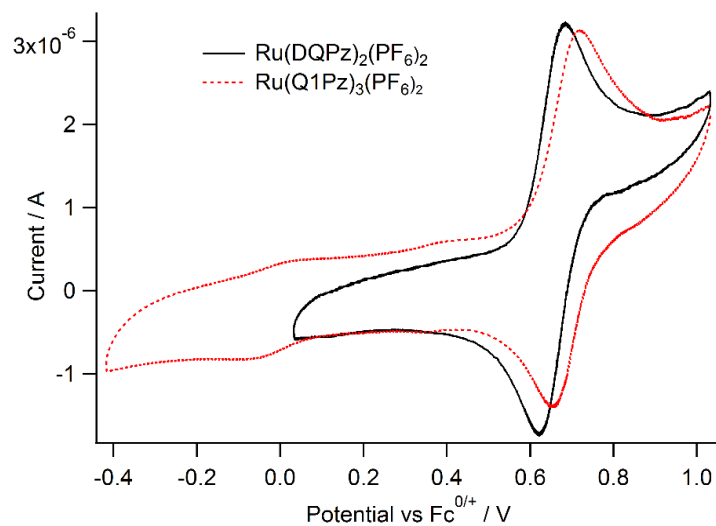

**Figure S5.** Cyclic voltammetry for the oxidations of *mer-fac*-[Ru(Q1Pz)<sub>3</sub>]<sup>2+</sup> and *mer*-[Ru(DQPz)<sub>2</sub>]<sup>2+</sup>.

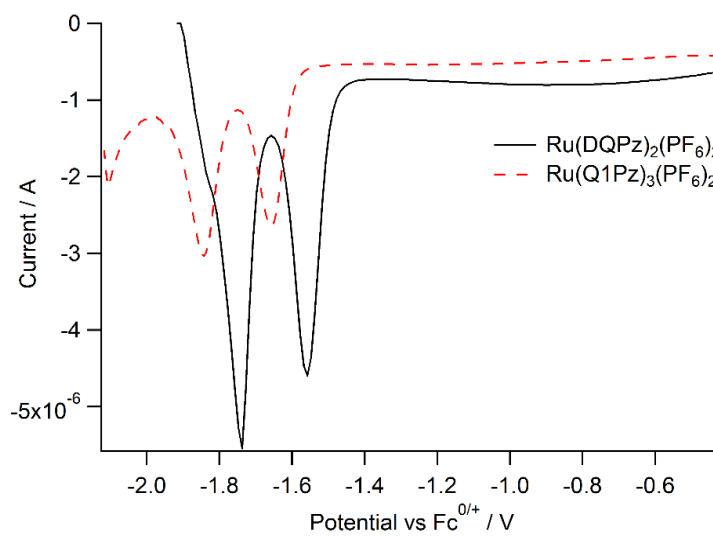

**Figure S6.** Differential pulse voltammetry for the reductions of *mer-fac*-[Ru(Q1Pz)<sub>3</sub>]<sup>2+</sup> and *mer*-[Ru(DQPz)<sub>2</sub>]<sup>2+</sup>.

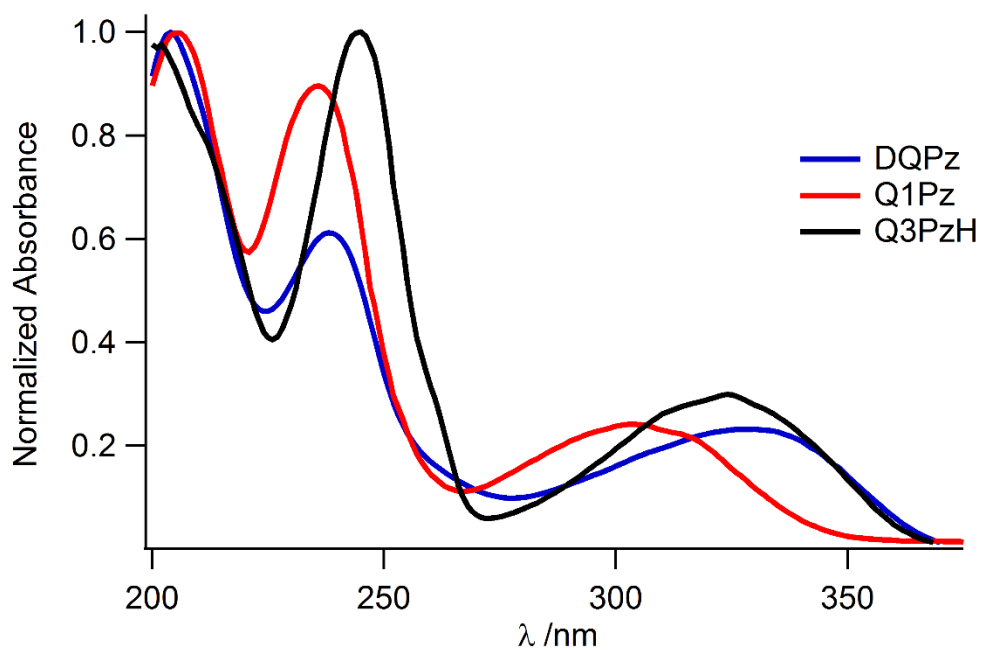

**Figure S7.** Electronic absorption spectra of ligands Q3PzH, Q1Pz and DQPz in neat acetonitrile.

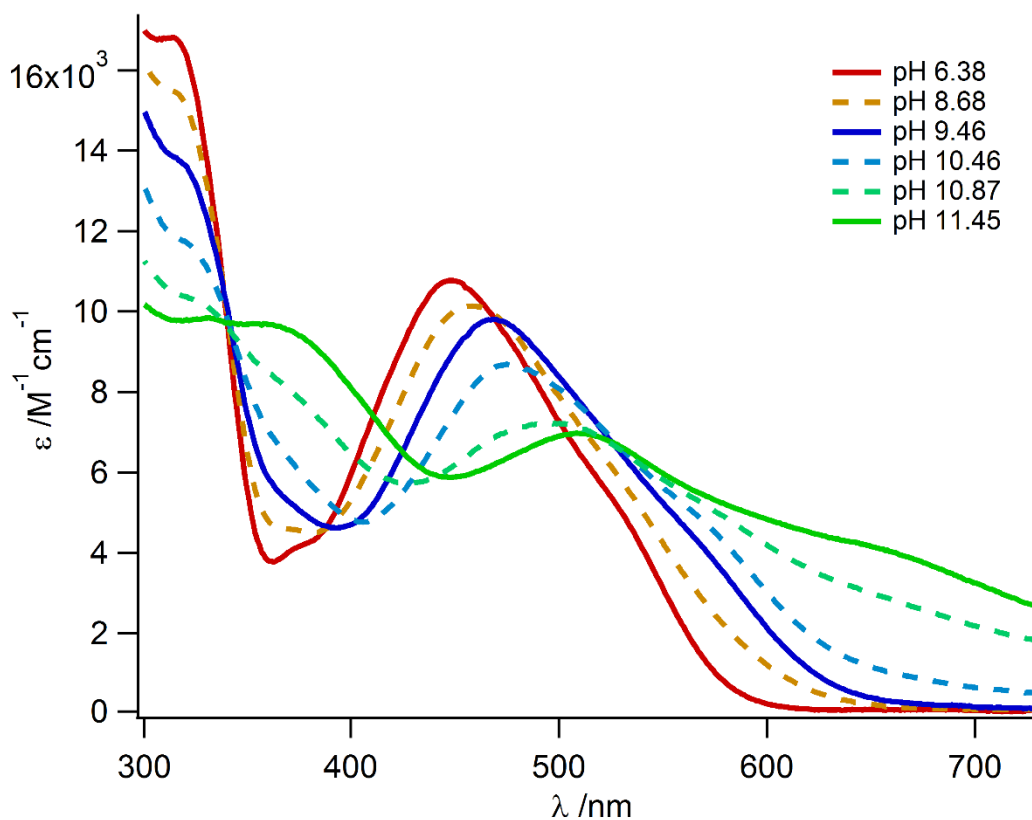

**Figure S8.** UV-Vis absorption spectra of  $mer\text{-}[\text{Ru}(\text{Q3PzH})_3]^{2+}$  in  $\text{H}_2\text{O}$  at different measured pH (set by HCl and NaOH).

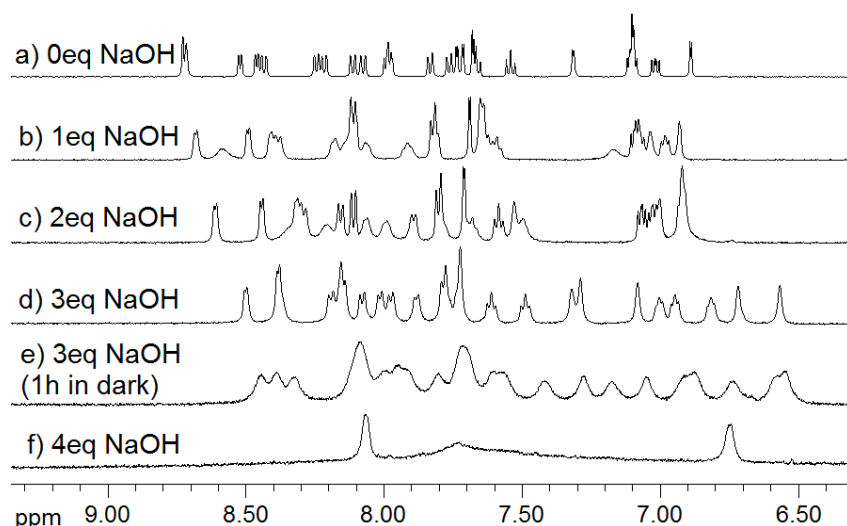

**Figure S9.**  $^1\text{H-NMR}$  spectra of  $[\text{Ru}(\text{Q3PzH})_3]^{2+}$  in  $\text{CD}_3\text{CN}$  titrated with  $\text{NaOH}(\text{aq})$ . Number of equivalents: (a) 0, (b) 1.0, (c) 2.0, (d) 3.0, (e) 3.0 after 1 h at room temperature in the dark and (f) 4.0 (*i.e.* +1 equivalent to sample in e).

**Table S2:** Electro-spray ionization high resolution mass spectrometry on  $\text{mer-}[\text{Ru}(\text{Q3PzH})_3]^{2+}$ ,  $\text{mer-}[\text{Ru}(\text{Q1Pz})_3]^{2+}$  and  $\text{mer-}[\text{Ru}(\text{DQPz})_2]^{2+}$  after 5 h light with 10 equivalents of triflic acid<sup>a</sup>

| Complex                                       | Species after 5h of irradiation <sup>b</sup> | <i>m/z</i> | Rel. int. (%) | Species without irradiation                          | <i>m/z</i> | Rel. int. (%)  |
|-----------------------------------------------|----------------------------------------------|------------|---------------|------------------------------------------------------|------------|----------------|
| $\text{mer-}[\text{Ru}(\text{Q3PzH})_3]^{2+}$ | $[\text{L}+\text{H}^+]^+$                    | 196.08724  | 100           | $[\text{L}+\text{H}^+]^+$                            | 196.08693  | 20             |
|                                               | $[\text{M}]^{2+}$                            | 343.57125  | 57            | $[\text{M}]^{2+}$                                    | 343.57159  | 100            |
|                                               | $[\text{M-L}+\text{CD}_3\text{CN}]^{2+}$     | 266.54442  | 9             |                                                      |            |                |
| $\text{mer-}[\text{Ru}(\text{Q1Pz})_3]^{2+}$  | $[\text{L}+\text{H}^+]^+$                    | 196.08657  | 100           | $[\text{L}+\text{H}^+]^+$                            | 196.08657  | 10             |
|                                               | $[\text{M}]^{2+}$                            | 343.57063  | 20            | $[\text{M}]^{2+}$                                    | 343.57063  | 100            |
|                                               | $[\text{M-L}]^{2+}$                          | 246.03088  | 9             | $[\text{M}^{2+}+\text{PF}_6^-]^+$                    | 832.10831  | 10             |
|                                               | $[\text{M-L}+\text{CD}_3\text{CN}]^{2+}$     | 266.54426  | 9             | $[\text{M}^{2+}-\text{L}+\text{DMSO}+\text{Cl}^-]^+$ | 605.04637  | 5 <sup>c</sup> |
|                                               | $[\text{M-L}+2\text{CD}_3\text{CN}]^{2+}$    | 290.07610  | 5             |                                                      |            |                |
| $\text{mer-}[\text{Ru}(\text{DQPz})_2]^{2+}$  | $[\text{M}]^{2+}$                            | 373.07371  | 100           | $[\text{M}]^{2+}$                                    | 373.07377  | 100            |

<sup>a</sup>The sample with  $[\text{Ru}(\text{DQPz})_2]^{2+}$  had 20 equivalents triflic acid. <sup>b</sup>L represents the respective ligand. <sup>c</sup>A minor contamination from the synthesis.

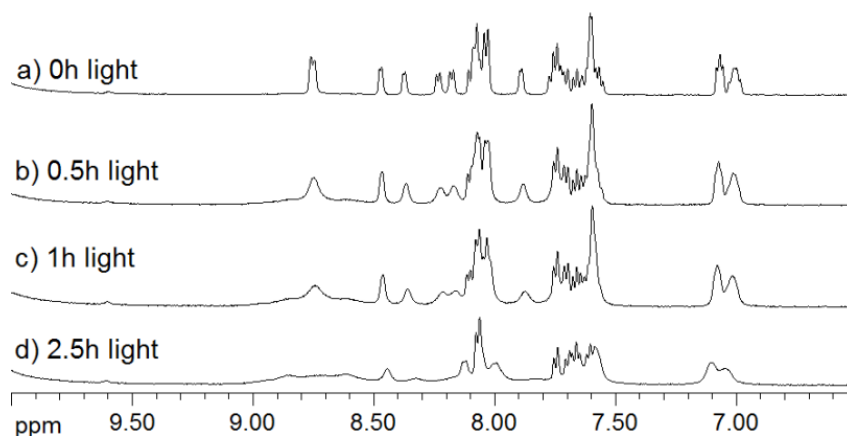

**Figure S10.**  $^1\text{H-NMR}$  spectra of  $[\text{Ru}(\text{DQPz})_2]^{2+}$  with 20 equiv. triflic acid after exposure to visible light for (a) 0 h after keeping the sample in the dark for 2 h, (b) 0.5 h, (c) 1 h and (d) 2.5 h.

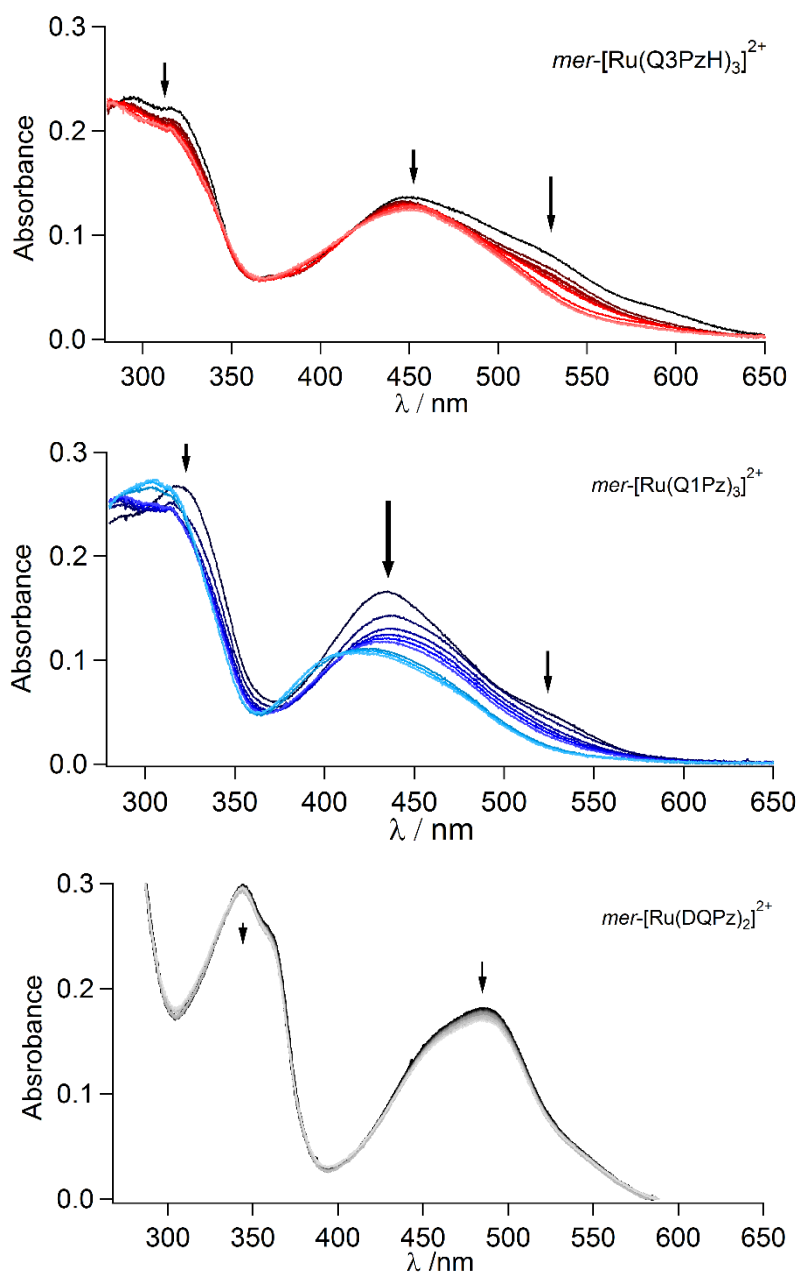

**Figure S11.** Absorption changes with continuous broad band visible light irradiation for (Top)  $mer-[Ru(Q3PzH)_3]^{2+}$ , (Middle)  $mer-[Ru(Q1Pz)_3]^{2+}$  and (Bottom)  $mer-[Ru(DQPz)_2]^{2+}$  in neat acetonitrile (without triflic acid).

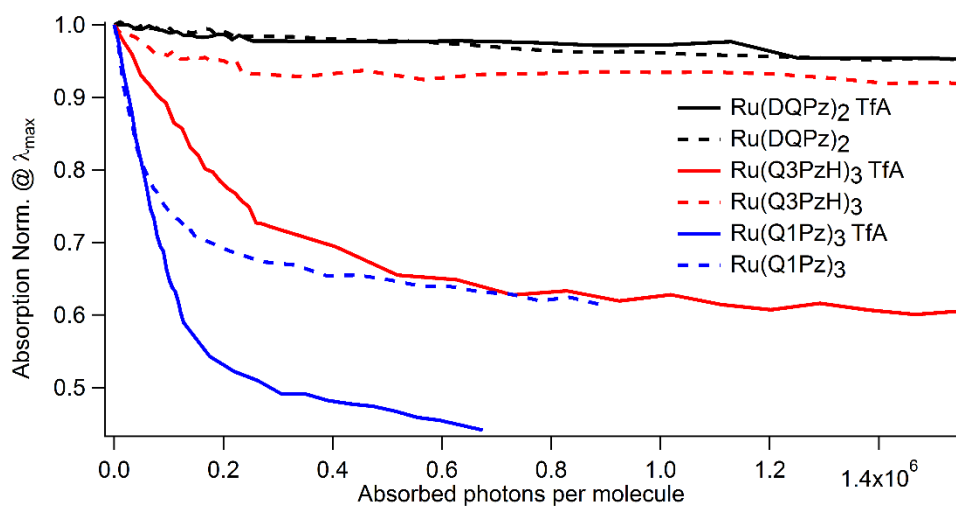

**Figure S12:** Kinetic traces following the changes in UV/vis absorption at specified wavelengths as a function of photons absorbed per molecule in the light experiment for *mer*-[Ru(Q3PzH)<sub>3</sub>]<sup>2+</sup> (a) and *mer*-[Ru(Q1Pz)<sub>3</sub>]<sup>2+</sup> (b). Solid lines are for experiments without acid and dashed lines are with 10 equiv. triflic acid.

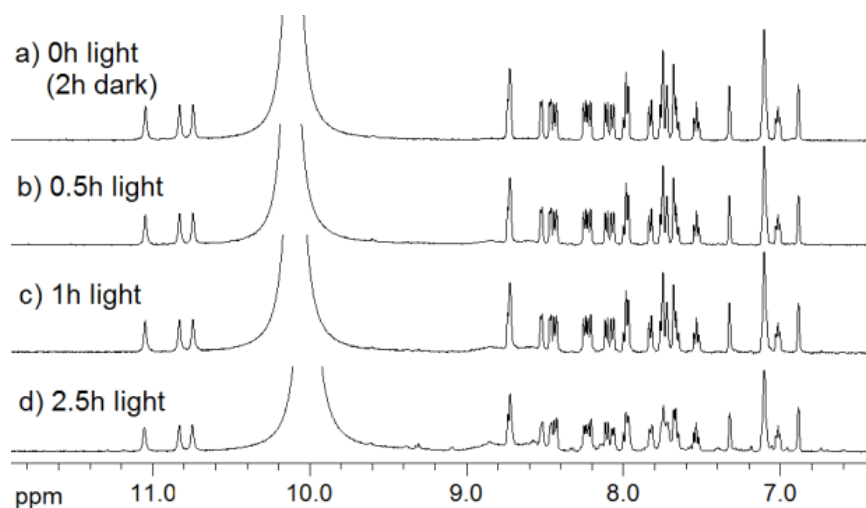

**Figure S13.** <sup>1</sup>H-NMR spectra of *mer*-[Ru(Q3PzH)<sub>3</sub>]<sup>2+</sup> with 10 equiv. triflic acid after exposure to visible light for (a) 0 h after keeping the sample in the dark for 2 h, (b) 0.5 h, (c) 1 h and (d) 2.5 h.

TDDFT calculated transitions for *fac*-[Ru(Q3PzH)<sub>3</sub>]<sup>2+</sup> (**Table S3**), *fac*-[Ru(Q3PzH)<sub>2</sub>(Q3Pz)]<sup>+</sup> (**Table S4**), *fac*-[Ru(Q3PzH)(Q3Pz)<sub>2</sub>] (**Table S5**), *fac*-[Ru(Q3Pz)<sub>3</sub>]<sup>-</sup> (**Table S6**), *mer*-[Ru(Q3PzH)<sub>3</sub>]<sup>2+</sup> (**Table S7**), *mer*-[Ru(Q3PzH)<sub>2</sub>(Q3Pz<sub>a</sub>)]<sup>+</sup> (**Table S8**), *mer*-[Ru(Q3PzH)<sub>2</sub>(Q3Pz<sub>b</sub>)]<sup>+</sup> (**Table S9**), *mer*-[Ru(Q3PzH)<sub>2</sub>(Q3Pz<sub>c</sub>)]<sup>+</sup> (**Table S10**), *mer*-[Ru(Q3PzH<sub>a</sub>)(Q3Pz)<sub>2</sub>] (**Table S11**), *mer*-[Ru(Q3PzH<sub>b</sub>)(Q3Pz)<sub>2</sub>] (**Table S12**), *mer*-[Ru(Q3PzH<sub>c</sub>)(Q3Pz)<sub>2</sub>] (**Table S13**), *mer*-[Ru(Q3Pz)<sub>3</sub>]<sup>-</sup> (**Table S14**), *fac*-[Ru(Q1Pz)<sub>3</sub>]<sup>2+</sup> (**Table S15**), *mer*-[Ru(Q1Pz)<sub>3</sub>]<sup>2+</sup> (**Table S16**), *cis-fac*-[Ru(DQPz)<sub>2</sub>]<sup>2+</sup> (**Table S17**), *trans-fac*-[Ru(DQPz)<sub>2</sub>]<sup>2+</sup> (**Table S18**), *C-R<sub>a</sub>-mer*-[Ru(DQPz)<sub>2</sub>]<sup>2+</sup> (**Table S19**), *C-S<sub>a</sub>-mer*-[Ru(DQPz)<sub>2</sub>]<sup>2+</sup> (**Table S20**).

**Table S3.** TDDFT calculated transitions for *fac*-[Ru(Q3PzH)<sub>3</sub>]<sup>2+</sup>.

| Excited State | Energy (eV) | Wavelength (nm) | f      | Transitions |   |     |          |
|---------------|-------------|-----------------|--------|-------------|---|-----|----------|
| 1             | 2.6983      | 459.48          | 0.0199 | 160         | → | 161 | 0.17523  |
|               |             |                 |        | 160         | → | 162 | 0.67352  |
| 2             | 2.7374      | 452.93          | 0.0831 | 160         | → | 161 | 0.64617  |
|               |             |                 |        | 160         | → | 162 | -0.17321 |
|               |             |                 |        | 160         | → | 163 | -0.18627 |
| 3             | 2.8519      | 434.74          | 0.0508 | 159         | → | 161 | -0.40809 |
|               |             |                 |        | 159         | → | 163 | 0.15969  |
|               |             |                 |        | 160         | → | 161 | 0.17516  |
|               |             |                 |        | 160         | → | 163 | 0.49971  |
| 4             | 2.8972      | 427.94          | 0.0486 | 158         | → | 162 | 0.1094   |
|               |             |                 |        | 159         | → | 161 | 0.12853  |
|               |             |                 |        | 159         | → | 162 | 0.64844  |
|               |             |                 |        | 159         | → | 163 | -0.14987 |
|               |             |                 |        | 160         | → | 163 | 0.11858  |
|               |             |                 |        | 160         | → | 163 | 0.25514  |
| 5             | 2.9109      | 425.93          | 0.0202 | 158         | → | 162 | -0.11042 |
|               |             |                 |        | 159         | → | 161 | 0.52244  |
|               |             |                 |        | 159         | → | 163 | 0.34499  |
|               |             |                 |        | 160         | → | 161 | 0.10375  |
|               |             |                 |        | 160         | → | 163 | 0.25514  |
| 6             | 2.9773      | 416.43          | 0.0037 | 158         | → | 162 | 0.26407  |
|               |             |                 |        | 159         | → | 161 | -0.14231 |
|               |             |                 |        | 159         | → | 162 | 0.15287  |
|               |             |                 |        | 159         | → | 163 | 0.53776  |
|               |             |                 |        | 160         | → | 163 | -0.26483 |
| 7             | 3.1097      | 398.71          | 0.0091 | 158         | → | 161 | 0.66699  |
|               |             |                 |        | 158         | → | 162 | 0.14543  |
|               |             |                 |        | 158         | → | 163 | 0.1162   |
| 8             | 3.1911      | 388.53          | 0.0511 | 158         | → | 162 | -0.1647  |
|               |             |                 |        | 158         | → | 163 | 0.65001  |
|               |             |                 |        | 160         | → | 163 | -0.12731 |
| 9             | 3.204       | 386.96          | 0.0782 | 158         | → | 161 | -0.141   |
|               |             |                 |        | 158         | → | 162 | 0.57048  |
|               |             |                 |        | 158         | → | 163 | 0.17836  |
|               |             |                 |        | 159         | → | 162 | -0.19346 |
|               |             |                 |        | 159         | → | 163 | -0.13544 |
|               |             |                 |        | 160         | → | 163 | 0.16151  |



|     |        |        |          |     |        |        |          |
|-----|--------|--------|----------|-----|--------|--------|----------|
| 10  | 3.6411 | 340.51 | 0.0031   | 160 | →      | 164    | 0.25414  |
|     |        |        |          | 160 | →      | 165    | 0.42522  |
|     |        |        |          | 160 | →      | 169    | -0.1187  |
|     |        |        |          | 160 | →      | 173    | 0.13151  |
|     |        |        |          | 160 | →      | 174    | 0.3236   |
| 11  | 3.7505 | 330.58 | 0.0009   | 160 | →      | 175    | 0.11661  |
|     |        |        |          | 158 | →      | 174    | 0.11408  |
|     |        |        |          | 158 | →      | 175    | -0.13734 |
|     |        |        |          | 159 | →      | 165    | 0.10576  |
|     |        |        |          | 159 | →      | 174    | 0.17126  |
|     |        |        |          | 160 | →      | 164    | 0.21208  |
|     |        |        |          | 160 | →      | 165    | -0.15849 |
|     |        |        |          | 160 | →      | 166    | -0.15704 |
|     |        |        |          | 160 | →      | 167    | 0.18701  |
|     |        |        |          | 160 | →      | 168    | 0.17487  |
| 12  | 3.8268 | 323.99 | 0.0056   | 160 | →      | 170    | 0.13123  |
|     |        |        |          | 160 | →      | 171    | -0.17011 |
|     |        |        |          | 160 | →      | 175    | 0.28627  |
|     |        |        |          | 160 | →      | 177    | -0.10436 |
|     |        |        |          | 158 | →      | 165    | -0.12856 |
|     |        |        |          | 158 | →      | 174    | -0.23017 |
|     |        |        |          | 159 | →      | 165    | -0.15858 |
|     |        |        |          | 159 | →      | 167    | 0.15902  |
|     |        |        |          | 159 | →      | 168    | 0.11082  |
|     |        |        |          | 159 | →      | 170    | 0.16253  |
| 13  | 3.8579 | 321.38 | 0.0916   | 159 | →      | 171    | -0.20701 |
|     |        |        |          | 159 | →      | 172    | -0.10561 |
|     |        |        |          | 159 | →      | 174    | -0.10271 |
|     |        |        |          | 159 | →      | 175    | 0.33503  |
|     |        |        |          | 159 | →      | 177    | -0.12639 |
|     |        |        |          | 160 | →      | 165    | -0.20335 |
|     |        |        |          | 157 | →      | 161    | 0.55978  |
|     |        |        |          | 157 | →      | 162    | 0.31005  |
|     |        |        |          | 157 | →      | 163    | -0.18636 |
|     |        |        |          | 14  | 3.8809 | 319.48 | 0.0392   |
| 157 | →      | 163    | -0.15171 |     |        |        |          |
| 159 | →      | 164    | -0.19617 |     |        |        |          |
| 159 | →      | 165    | -0.16474 |     |        |        |          |
| 159 | →      | 174    | -0.15728 |     |        |        |          |
| 160 | →      | 164    | 0.34514  |     |        |        |          |
| 160 | →      | 165    | -0.30778 |     |        |        |          |
| 160 | →      | 166    | 0.12518  |     |        |        |          |
| 15  | 3.9145 | 316.73 | 0.0396   | 155 | →      | 161    | -0.11339 |
|     |        |        |          | 156 | →      | 161    | -0.1072  |
|     |        |        |          | 156 | →      | 162    | -0.1276  |
|     |        |        |          | 157 | →      | 161    | -0.21489 |

|    |        |        |        |     |   |     |          |
|----|--------|--------|--------|-----|---|-----|----------|
|    |        |        |        | 157 | → | 162 | 0.3641   |
|    |        |        |        | 157 | → | 163 | -0.32516 |
|    |        |        |        | 158 | → | 174 | -0.10053 |
|    |        |        |        | 160 | → | 165 | 0.23033  |
|    |        |        |        | 160 | → | 166 | -0.16443 |
|    |        |        |        | 160 | → | 174 | -0.12727 |
| 16 | 3.9314 | 315.37 | 0.0274 | 156 | → | 161 | 0.1104   |
|    |        |        |        | 157 | → | 161 | 0.14147  |
|    |        |        |        | 157 | → | 162 | -0.12065 |
|    |        |        |        | 157 | → | 163 | 0.18319  |
|    |        |        |        | 158 | → | 165 | -0.13173 |
|    |        |        |        | 158 | → | 174 | -0.19866 |
|    |        |        |        | 160 | → | 164 | 0.40802  |
|    |        |        |        | 160 | → | 165 | 0.12283  |
|    |        |        |        | 160 | → | 166 | -0.20789 |
|    |        |        |        | 160 | → | 174 | -0.19134 |
|    |        |        |        | 160 | → | 175 | -0.12927 |
| 17 | 3.976  | 311.83 | 0.0841 | 156 | → | 161 | -0.2279  |
|    |        |        |        | 156 | → | 162 | 0.48988  |
|    |        |        |        | 157 | → | 162 | -0.23466 |
|    |        |        |        | 157 | → | 163 | -0.29073 |
|    |        |        |        | 160 | → | 166 | -0.16052 |
| 18 | 4.0056 | 309.53 | 0.0061 | 155 | → | 161 | -0.13729 |
|    |        |        |        | 156 | → | 161 | -0.19019 |
|    |        |        |        | 156 | → | 162 | -0.13447 |
|    |        |        |        | 157 | → | 161 | 0.1255   |
|    |        |        |        | 157 | → | 162 | -0.20193 |
|    |        |        |        | 157 | → | 163 | -0.15954 |
|    |        |        |        | 158 | → | 175 | -0.10934 |
|    |        |        |        | 160 | → | 165 | 0.14585  |
|    |        |        |        | 160 | → | 166 | 0.41167  |
|    |        |        |        | 160 | → | 167 | 0.1127   |
|    |        |        |        | 160 | → | 174 | -0.13138 |
| 19 | 4.0151 | 308.79 | 0.0312 | 155 | → | 161 | 0.13785  |
|    |        |        |        | 155 | → | 162 | -0.11103 |
|    |        |        |        | 156 | → | 161 | 0.10149  |
|    |        |        |        | 156 | → | 162 | 0.36399  |
|    |        |        |        | 157 | → | 162 | 0.32086  |
|    |        |        |        | 157 | → | 163 | 0.15814  |
|    |        |        |        | 159 | → | 165 | 0.15823  |
|    |        |        |        | 160 | → | 166 | 0.26397  |
| 20 | 4.0378 | 307.06 | 0.0135 | 155 | → | 161 | 0.13237  |
|    |        |        |        | 155 | → | 162 | 0.1783   |
|    |        |        |        | 156 | → | 161 | 0.34454  |
|    |        |        |        | 157 | → | 162 | -0.13267 |
|    |        |        |        | 157 | → | 163 | -0.31156 |

|    |        |        |        |     |   |     |          |
|----|--------|--------|--------|-----|---|-----|----------|
|    |        |        |        | 159 | → | 164 | 0.2407   |
|    |        |        |        | 159 | → | 165 | 0.1361   |
|    |        |        |        | 160 | → | 164 | 0.12934  |
|    |        |        |        | 160 | → | 166 | 0.11469  |
|    |        |        |        | 160 | → | 168 | -0.20421 |
| 21 | 4.0558 | 305.7  | 0.0199 | 155 | → | 162 | -0.11113 |
|    |        |        |        | 156 | → | 161 | -0.33911 |
|    |        |        |        | 157 | → | 163 | 0.18733  |
|    |        |        |        | 159 | → | 164 | 0.3427   |
|    |        |        |        | 159 | → | 166 | 0.18063  |
|    |        |        |        | 159 | → | 167 | 0.1009   |
|    |        |        |        | 160 | → | 164 | 0.19604  |
|    |        |        |        | 160 | → | 167 | -0.17145 |
|    |        |        |        | 160 | → | 168 | -0.21008 |
| 22 | 4.079  | 303.96 | 0.0627 | 155 | → | 161 | -0.14086 |
|    |        |        |        | 155 | → | 162 | -0.19981 |
|    |        |        |        | 155 | → | 163 | 0.12889  |
|    |        |        |        | 156 | → | 162 | -0.13618 |
|    |        |        |        | 156 | → | 163 | 0.25809  |
|    |        |        |        | 158 | → | 164 | 0.1142   |
|    |        |        |        | 159 | → | 164 | -0.13831 |
|    |        |        |        | 159 | → | 165 | 0.3889   |
|    |        |        |        | 159 | → | 166 | -0.16342 |
|    |        |        |        | 160 | → | 167 | -0.1659  |
|    |        |        |        | 160 | → | 168 | -0.10449 |
| 23 | 4.1003 | 302.38 | 0.0026 | 155 | → | 161 | -0.17088 |
|    |        |        |        | 155 | → | 162 | -0.21043 |
|    |        |        |        | 155 | → | 163 | 0.12239  |
|    |        |        |        | 156 | → | 161 | 0.29021  |
|    |        |        |        | 156 | → | 163 | 0.38397  |
|    |        |        |        | 159 | → | 164 | 0.18943  |
|    |        |        |        | 159 | → | 165 | -0.2438  |
| 24 | 4.1704 | 297.3  | 0.0036 | 155 | → | 161 | 0.10124  |
|    |        |        |        | 158 | → | 174 | -0.10702 |
|    |        |        |        | 158 | → | 175 | 0.11395  |
|    |        |        |        | 159 | → | 164 | 0.21173  |
|    |        |        |        | 159 | → | 165 | 0.28163  |
|    |        |        |        | 159 | → | 166 | 0.11742  |
|    |        |        |        | 159 | → | 167 | -0.12366 |
|    |        |        |        | 159 | → | 168 | -0.12819 |
|    |        |        |        | 160 | → | 167 | 0.28815  |
|    |        |        |        | 160 | → | 168 | 0.28257  |
| 25 | 4.1837 | 296.35 | 0.0026 | 155 | → | 161 | 0.52792  |
|    |        |        |        | 155 | → | 162 | -0.14209 |
|    |        |        |        | 155 | → | 163 | 0.11758  |
|    |        |        |        | 156 | → | 162 | -0.14159 |

|    |        |        |        |     |   |     |          |
|----|--------|--------|--------|-----|---|-----|----------|
|    |        |        |        | 156 | → | 163 | 0.13402  |
|    |        |        |        | 157 | → | 163 | -0.11285 |
|    |        |        |        | 160 | → | 167 | 0.16531  |
|    |        |        |        | 160 | → | 168 | -0.18066 |
| 26 | 4.1986 | 295.3  | 0.003  | 155 | → | 161 | -0.16664 |
|    |        |        |        | 155 | → | 162 | 0.376    |
|    |        |        |        | 156 | → | 163 | 0.21797  |
|    |        |        |        | 158 | → | 164 | -0.18992 |
|    |        |        |        | 158 | → | 166 | -0.10206 |
|    |        |        |        | 159 | → | 166 | -0.13027 |
|    |        |        |        | 159 | → | 167 | -0.14206 |
|    |        |        |        | 160 | → | 166 | -0.11345 |
|    |        |        |        | 160 | → | 167 | 0.21163  |
|    |        |        |        | 160 | → | 168 | -0.23553 |
| 27 | 4.2084 | 294.61 | 0.0087 | 158 | → | 164 | -0.14729 |
|    |        |        |        | 159 | → | 164 | -0.30996 |
|    |        |        |        | 159 | → | 166 | 0.48837  |
|    |        |        |        | 159 | → | 167 | 0.11396  |
|    |        |        |        | 159 | → | 168 | -0.12371 |
|    |        |        |        | 160 | → | 167 | 0.11281  |
|    |        |        |        | 160 | → | 168 | -0.19032 |
|    |        |        |        | 160 | → | 169 | -0.11165 |
| 28 | 4.2162 | 294.06 | 0.0061 | 155 | → | 161 | 0.17653  |
|    |        |        |        | 155 | → | 162 | 0.37936  |
|    |        |        |        | 156 | → | 161 | -0.10705 |
|    |        |        |        | 156 | → | 163 | 0.32357  |
|    |        |        |        | 158 | → | 164 | 0.11045  |
|    |        |        |        | 159 | → | 164 | -0.10482 |
|    |        |        |        | 159 | → | 166 | 0.13472  |
|    |        |        |        | 160 | → | 167 | -0.22499 |
|    |        |        |        | 160 | → | 168 | 0.22313  |
| 29 | 4.2349 | 292.77 | 0.005  | 155 | → | 162 | 0.13709  |
|    |        |        |        | 155 | → | 163 | 0.12587  |
|    |        |        |        | 156 | → | 163 | -0.13925 |
|    |        |        |        | 158 | → | 164 | 0.39103  |
|    |        |        |        | 158 | → | 165 | -0.19848 |
|    |        |        |        | 158 | → | 166 | 0.17984  |
|    |        |        |        | 158 | → | 167 | 0.22155  |
|    |        |        |        | 160 | → | 167 | 0.20031  |
|    |        |        |        | 160 | → | 168 | -0.1968  |
| 30 | 4.2719 | 290.23 | 0.0061 | 154 | → | 163 | -0.11454 |
|    |        |        |        | 155 | → | 163 | 0.46345  |
|    |        |        |        | 156 | → | 162 | 0.1054   |
|    |        |        |        | 156 | → | 163 | -0.19056 |
|    |        |        |        | 158 | → | 164 | -0.14418 |
|    |        |        |        | 158 | → | 166 | -0.14576 |

|    |        |        |        |     |   |     |          |
|----|--------|--------|--------|-----|---|-----|----------|
|    |        |        |        | 159 | → | 164 | -0.11956 |
|    |        |        |        | 160 | → | 169 | 0.2925   |
| 31 | 4.2834 | 289.45 | 0.0038 | 154 | → | 163 | -0.11864 |
|    |        |        |        | 155 | → | 163 | -0.26989 |
|    |        |        |        | 158 | → | 164 | 0.11894  |
|    |        |        |        | 158 | → | 165 | 0.29495  |
|    |        |        |        | 159 | → | 166 | 0.14438  |
|    |        |        |        | 159 | → | 174 | -0.10191 |
|    |        |        |        | 160 | → | 169 | 0.40259  |
| 32 | 4.3006 | 288.3  | 0.0256 | 154 | → | 163 | 0.1103   |
|    |        |        |        | 155 | → | 163 | 0.23458  |
|    |        |        |        | 158 | → | 164 | 0.15348  |
|    |        |        |        | 158 | → | 165 | 0.45484  |
|    |        |        |        | 158 | → | 174 | -0.12514 |
|    |        |        |        | 160 | → | 169 | -0.24443 |
|    |        |        |        | 160 | → | 174 | -0.1764  |
| 33 | 4.351  | 284.96 | 0.0076 | 152 | → | 162 | 0.11852  |
|    |        |        |        | 153 | → | 162 | -0.20498 |
|    |        |        |        | 158 | → | 164 | -0.12408 |
|    |        |        |        | 158 | → | 166 | 0.2153   |
|    |        |        |        | 158 | → | 167 | -0.12429 |
|    |        |        |        | 158 | → | 168 | -0.10787 |
|    |        |        |        | 159 | → | 165 | 0.10365  |
|    |        |        |        | 159 | → | 166 | -0.13843 |
|    |        |        |        | 159 | → | 167 | 0.47681  |
|    |        |        |        | 160 | → | 167 | 0.13386  |
| 34 | 4.379  | 283.14 | 0.0015 | 158 | → | 164 | -0.18907 |
|    |        |        |        | 158 | → | 166 | 0.36363  |
|    |        |        |        | 158 | → | 167 | 0.17972  |
|    |        |        |        | 158 | → | 168 | -0.10085 |
|    |        |        |        | 159 | → | 166 | 0.10908  |
|    |        |        |        | 159 | → | 168 | 0.30683  |
|    |        |        |        | 159 | → | 169 | 0.10671  |
|    |        |        |        | 159 | → | 174 | -0.16087 |
| 35 | 4.4284 | 279.98 | 0.0055 | 155 | → | 163 | 0.13641  |
|    |        |        |        | 158 | → | 166 | 0.32654  |
|    |        |        |        | 158 | → | 168 | -0.16455 |
|    |        |        |        | 158 | → | 171 | 0.12527  |
|    |        |        |        | 158 | → | 175 | -0.20549 |
|    |        |        |        | 159 | → | 167 | -0.22003 |
|    |        |        |        | 159 | → | 168 | -0.2403  |
|    |        |        |        | 159 | → | 171 | -0.11175 |
|    |        |        |        | 159 | → | 175 | 0.11995  |
|    |        |        |        | 160 | → | 171 | 0.10398  |
|    |        |        |        | 160 | → | 175 | -0.12215 |
| 36 | 4.4569 | 278.19 | 0.0042 | 158 | → | 164 | 0.10324  |

|    |        |        |        |     |   |     |          |
|----|--------|--------|--------|-----|---|-----|----------|
|    |        |        |        | 159 | → | 168 | 0.40369  |
|    |        |        |        | 159 | → | 173 | 0.10401  |
|    |        |        |        | 159 | → | 174 | 0.29574  |
|    |        |        |        | 160 | → | 167 | 0.1211   |
|    |        |        |        | 160 | → | 170 | -0.13629 |
|    |        |        |        | 160 | → | 171 | 0.16147  |
|    |        |        |        | 160 | → | 174 | 0.14495  |
|    |        |        |        | 160 | → | 175 | -0.17873 |
| 37 | 4.4758 | 277.01 | 0.0208 | 154 | → | 161 | -0.14022 |
|    |        |        |        | 158 | → | 164 | -0.23547 |
|    |        |        |        | 158 | → | 165 | 0.12128  |
|    |        |        |        | 158 | → | 166 | 0.10784  |
|    |        |        |        | 158 | → | 167 | 0.33327  |
|    |        |        |        | 158 | → | 168 | 0.23507  |
|    |        |        |        | 159 | → | 165 | -0.11486 |
|    |        |        |        | 159 | → | 166 | -0.15166 |
|    |        |        |        | 159 | → | 168 | -0.23216 |
|    |        |        |        | 159 | → | 174 | 0.21592  |
|    |        |        |        | 160 | → | 169 | 0.10818  |
| 38 | 4.5354 | 273.37 | 0.0477 | 152 | → | 163 | 0.10392  |
|    |        |        |        | 153 | → | 162 | -0.17245 |
|    |        |        |        | 154 | → | 161 | -0.21861 |
|    |        |        |        | 158 | → | 167 | -0.24636 |
|    |        |        |        | 158 | → | 168 | 0.27239  |
|    |        |        |        | 158 | → | 169 | 0.15737  |
|    |        |        |        | 158 | → | 174 | -0.14364 |
|    |        |        |        | 159 | → | 167 | -0.11553 |
|    |        |        |        | 159 | → | 169 | 0.29712  |
|    |        |        |        | 160 | → | 174 | 0.10908  |
| 39 | 4.5646 | 271.62 | 0.0031 | 153 | → | 162 | 0.15228  |
|    |        |        |        | 158 | → | 166 | -0.11339 |
|    |        |        |        | 158 | → | 167 | 0.18992  |
|    |        |        |        | 158 | → | 168 | -0.21124 |
|    |        |        |        | 158 | → | 175 | -0.11297 |
|    |        |        |        | 159 | → | 165 | 0.12537  |
|    |        |        |        | 159 | → | 167 | 0.15842  |
|    |        |        |        | 159 | → | 169 | 0.49597  |
| 40 | 4.6115 | 268.86 | 0.064  | 152 | → | 161 | -0.1763  |
|    |        |        |        | 153 | → | 161 | -0.14889 |
|    |        |        |        | 154 | → | 161 | 0.11008  |
|    |        |        |        | 154 | → | 162 | -0.14978 |
|    |        |        |        | 154 | → | 163 | 0.28567  |
|    |        |        |        | 157 | → | 164 | 0.24948  |
|    |        |        |        | 157 | → | 166 | -0.17256 |
|    |        |        |        | 158 | → | 168 | -0.10606 |
|    |        |        |        | 158 | → | 169 | 0.1784   |

|    |        |        |        |     |   |     |          |
|----|--------|--------|--------|-----|---|-----|----------|
|    |        |        |        | 159 | → | 169 | -0.14636 |
|    |        |        |        | 160 | → | 169 | 0.3043   |
| 41 | 4.6195 | 268.39 | 0.0683 | 154 | → | 161 | 0.35652  |
|    |        |        |        | 156 | → | 164 | 0.11758  |
|    |        |        |        | 157 | → | 165 | 0.17038  |
|    |        |        |        | 157 | → | 169 | 0.11222  |
|    |        |        |        | 158 | → | 164 | -0.11672 |
|    |        |        |        | 158 | → | 165 | 0.11221  |
|    |        |        |        | 158 | → | 166 | 0.17     |
|    |        |        |        | 158 | → | 168 | 0.14234  |
|    |        |        |        | 158 | → | 174 | -0.2139  |
|    |        |        |        | 158 | → | 175 | -0.12063 |
|    |        |        |        | 159 | → | 175 | -0.1027  |
|    |        |        |        | 160 | → | 166 | -0.11559 |
|    |        |        |        | 160 | → | 168 | -0.13222 |
|    |        |        |        | 160 | → | 174 | 0.12952  |
| 42 | 4.6401 | 267.2  | 0.0149 | 154 | → | 161 | 0.17199  |
|    |        |        |        | 158 | → | 164 | -0.10943 |
|    |        |        |        | 158 | → | 166 | 0.10237  |
|    |        |        |        | 158 | → | 168 | 0.244    |
|    |        |        |        | 158 | → | 173 | 0.11391  |
|    |        |        |        | 158 | → | 174 | 0.24856  |
|    |        |        |        | 158 | → | 175 | 0.15888  |
|    |        |        |        | 159 | → | 169 | 0.28339  |
|    |        |        |        | 159 | → | 174 | 0.14382  |
|    |        |        |        | 159 | → | 175 | 0.17705  |
|    |        |        |        | 160 | → | 174 | -0.15433 |
|    |        |        |        | 160 | → | 175 | -0.1199  |
| 43 | 4.7575 | 260.61 | 0.0125 | 153 | → | 162 | 0.21373  |
|    |        |        |        | 156 | → | 164 | -0.14821 |
|    |        |        |        | 156 | → | 166 | -0.12984 |
|    |        |        |        | 158 | → | 165 | -0.12297 |
|    |        |        |        | 158 | → | 168 | 0.36013  |
|    |        |        |        | 158 | → | 170 | -0.10391 |
|    |        |        |        | 158 | → | 171 | 0.14358  |
|    |        |        |        | 158 | → | 175 | -0.18015 |
|    |        |        |        | 159 | → | 167 | 0.1758   |
|    |        |        |        | 159 | → | 174 | -0.15694 |
| 44 | 4.8021 | 258.19 | 0.0448 | 152 | → | 162 | -0.1357  |
|    |        |        |        | 153 | → | 162 | 0.15807  |
|    |        |        |        | 154 | → | 162 | 0.17806  |
|    |        |        |        | 156 | → | 164 | -0.1353  |
|    |        |        |        | 156 | → | 166 | -0.12071 |
|    |        |        |        | 158 | → | 166 | 0.16686  |
|    |        |        |        | 158 | → | 167 | -0.20591 |
|    |        |        |        | 158 | → | 169 | 0.44112  |

|     |        |        |         |     |        |        |          |     |   |     |          |
|-----|--------|--------|---------|-----|--------|--------|----------|-----|---|-----|----------|
|     |        |        |         | 158 | →      | 175    | 0.1388   |     |   |     |          |
| 45  | 4.812  | 257.66 | 0.0122  | 153 | →      | 162    | -0.14696 |     |   |     |          |
|     |        |        |         | 154 | →      | 162    | 0.22492  |     |   |     |          |
|     |        |        |         | 158 | →      | 166    | -0.11204 |     |   |     |          |
|     |        |        |         | 158 | →      | 167    | 0.2854   |     |   |     |          |
|     |        |        |         | 158 | →      | 169    | 0.35878  |     |   |     |          |
|     |        |        |         | 158 | →      | 170    | -0.10182 |     |   |     |          |
|     |        |        |         | 158 | →      | 171    | 0.13685  |     |   |     |          |
|     |        |        |         | 158 | →      | 174    | 0.11114  |     |   |     |          |
|     |        |        |         | 158 | →      | 175    | -0.15606 |     |   |     |          |
|     |        |        |         | 159 | →      | 168    | 0.12853  |     |   |     |          |
| 46  | 4.8197 | 257.24 | 0.0034  | 159 | →      | 174    | -0.1511  |     |   |     |          |
|     |        |        |         | 152 | →      | 161    | -0.19928 |     |   |     |          |
|     |        |        |         | 153 | →      | 161    | -0.26985 |     |   |     |          |
|     |        |        |         | 154 | →      | 161    | -0.13131 |     |   |     |          |
|     |        |        |         | 154 | →      | 162    | 0.50624  |     |   |     |          |
|     |        |        |         | 158 | →      | 169    | -0.24558 |     |   |     |          |
|     |        |        |         | 47  | 4.8604 | 255.09 | 0.0074   | 152 | → | 162 | -0.2383  |
|     |        |        |         |     |        |        |          | 152 | → | 163 | 0.27951  |
|     |        |        |         |     |        |        |          | 153 | → | 162 | -0.23724 |
|     |        |        |         |     |        |        |          | 153 | → | 163 | 0.31269  |
| 154 | →      | 161    | 0.36117 |     |        |        |          |     |   |     |          |
| 48  | 4.8714 | 254.51 | 0.0023  | 157 | →      | 165    | -0.19226 |     |   |     |          |
|     |        |        |         | 152 | →      | 161    | 0.20579  |     |   |     |          |
|     |        |        |         | 153 | →      | 161    | 0.33356  |     |   |     |          |
|     |        |        |         | 154 | →      | 162    | 0.28895  |     |   |     |          |
|     |        |        |         | 154 | →      | 163    | 0.49969  |     |   |     |          |
| 49  | 4.9373 | 251.12 | 0.0038  | 152 | →      | 161    | 0.48452  |     |   |     |          |
|     |        |        |         | 152 | →      | 162    | 0.11836  |     |   |     |          |
|     |        |        |         | 153 | →      | 161    | -0.45667 |     |   |     |          |
|     |        |        |         | 154 | →      | 163    | 0.11961  |     |   |     |          |
| 50  | 4.988  | 248.56 | 0.0027  | 152 | →      | 162    | 0.50188  |     |   |     |          |
|     |        |        |         | 152 | →      | 163    | 0.21814  |     |   |     |          |
|     |        |        |         | 153 | →      | 162    | 0.29585  |     |   |     |          |
|     |        |        |         | 153 | →      | 163    | 0.22934  |     |   |     |          |
|     |        |        |         | 157 | →      | 165    | -0.16826 |     |   |     |          |

**Table S4.** TDDFT calculated transitions for *fac*-[Ru(Q3PzH)<sub>2</sub>(Q3Pz)]<sup>+</sup>.

| Excited State | Energy (eV) | Wavelength (nm) | f      | Transitions |   |     |          |
|---------------|-------------|-----------------|--------|-------------|---|-----|----------|
| 1             | 2.3545      | 526.58          | 0.0783 | 160         | → | 161 | 0.63228  |
|               |             |                 |        | 160         | → | 162 | -0.26438 |
|               |             |                 |        | 160         | → | 163 | 0.10197  |
| 2             | 2.3638      | 524.51          | 0.0205 | 160         | → | 161 | 0.24693  |
|               |             |                 |        | 160         | → | 162 | 0.64027  |
|               |             |                 |        | 160         | → | 163 | 0.1308   |
| 3             | 2.5132      | 493.34          | 0.0344 | 158         | → | 163 | 0.14216  |



|    |        |        |        |     |   |     |          |
|----|--------|--------|--------|-----|---|-----|----------|
|    |        |        |        | 160 | → | 161 | -0.11369 |
|    |        |        |        | 160 | → | 163 | 0.6489   |
| 4  | 2.5762 | 481.28 | 0.0039 | 159 | → | 161 | 0.68966  |
|    |        |        |        | 159 | → | 163 | -0.10882 |
| 5  | 2.7164 | 456.43 | 0.0406 | 157 | → | 161 | -0.20092 |
|    |        |        |        | 158 | → | 161 | 0.52985  |
|    |        |        |        | 158 | → | 162 | -0.10788 |
|    |        |        |        | 159 | → | 162 | -0.37521 |
| 6  | 2.742  | 452.16 | 0.0218 | 157 | → | 161 | -0.12984 |
|    |        |        |        | 158 | → | 161 | 0.35111  |
|    |        |        |        | 158 | → | 162 | 0.25273  |
|    |        |        |        | 159 | → | 162 | 0.43168  |
|    |        |        |        | 159 | → | 163 | 0.29316  |
| 7  | 2.7997 | 442.85 | 0.0005 | 157 | → | 162 | 0.13722  |
|    |        |        |        | 158 | → | 162 | -0.38361 |
|    |        |        |        | 159 | → | 163 | 0.54783  |
| 8  | 2.9018 | 427.27 | 0.0989 | 157 | → | 162 | -0.11536 |
|    |        |        |        | 157 | → | 163 | 0.11601  |
|    |        |        |        | 158 | → | 161 | -0.11059 |
|    |        |        |        | 158 | → | 162 | 0.4116   |
|    |        |        |        | 158 | → | 163 | -0.28505 |
|    |        |        |        | 159 | → | 162 | -0.34943 |
|    |        |        |        | 159 | → | 163 | 0.24963  |
| 9  | 3.0133 | 411.45 | 0.0714 | 157 | → | 163 | -0.20172 |
|    |        |        |        | 158 | → | 162 | 0.20743  |
|    |        |        |        | 158 | → | 163 | 0.57107  |
|    |        |        |        | 159 | → | 162 | -0.13441 |
|    |        |        |        | 160 | → | 163 | -0.16034 |
| 10 | 3.2224 | 384.76 | 0.0572 | 157 | → | 161 | 0.49846  |
|    |        |        |        | 157 | → | 162 | 0.31295  |
|    |        |        |        | 157 | → | 163 | 0.27575  |
|    |        |        |        | 158 | → | 161 | 0.18685  |
|    |        |        |        | 158 | → | 162 | 0.13029  |
|    |        |        |        | 158 | → | 163 | 0.1316   |
| 11 | 3.2457 | 381.99 | 0.0012 | 157 | → | 161 | -0.35819 |
|    |        |        |        | 157 | → | 162 | 0.56178  |
|    |        |        |        | 158 | → | 161 | -0.12546 |
|    |        |        |        | 158 | → | 162 | 0.16375  |
| 12 | 3.3368 | 371.57 | 0.0091 | 157 | → | 161 | -0.22488 |
|    |        |        |        | 157 | → | 162 | -0.1726  |
|    |        |        |        | 157 | → | 163 | 0.59163  |
|    |        |        |        | 158 | → | 163 | 0.20643  |
| 13 | 3.3905 | 365.68 | 0.0085 | 160 | → | 164 | 0.5194   |
|    |        |        |        | 160 | → | 165 | -0.38558 |
|    |        |        |        | 160 | → | 166 | 0.1424   |
|    |        |        |        | 160 | → | 167 | 0.10682  |

|    |        |        |        |     |   |     |          |
|----|--------|--------|--------|-----|---|-----|----------|
| 14 | 3.5669 | 347.6  | 0.005  | 160 | → | 164 | 0.42812  |
|    |        |        |        | 160 | → | 165 | 0.524    |
|    |        |        |        | 160 | → | 166 | -0.12329 |
| 15 | 3.661  | 338.66 | 0.0274 | 159 | → | 164 | -0.19503 |
|    |        |        |        | 159 | → | 166 | -0.11207 |
|    |        |        |        | 160 | → | 165 | 0.17103  |
|    |        |        |        | 160 | → | 166 | 0.5236   |
|    |        |        |        | 160 | → | 167 | -0.1476  |
|    |        |        |        | 160 | → | 168 | 0.10362  |
|    |        |        |        | 160 | → | 169 | -0.10916 |
|    |        |        |        | 160 | → | 173 | -0.15415 |
| 16 | 3.7932 | 326.86 | 0.0058 | 160 | → | 176 | 0.10666  |
|    |        |        |        | 158 | → | 164 | -0.18581 |
|    |        |        |        | 158 | → | 165 | 0.13144  |
|    |        |        |        | 159 | → | 164 | 0.39426  |
|    |        |        |        | 159 | → | 165 | -0.10007 |
|    |        |        |        | 159 | → | 173 | 0.10096  |
|    |        |        |        | 159 | → | 175 | 0.13944  |
|    |        |        |        | 159 | → | 177 | -0.1118  |
|    |        |        |        | 160 | → | 166 | 0.24809  |
|    |        |        |        | 160 | → | 168 | 0.16381  |
|    |        |        |        | 160 | → | 173 | 0.15078  |
|    |        |        |        | 160 | → | 175 | 0.15021  |
| 17 | 3.805  | 325.85 | 0.0047 | 160 | → | 177 | -0.10857 |
|    |        |        |        | 158 | → | 165 | -0.10082 |
|    |        |        |        | 159 | → | 164 | -0.28612 |
|    |        |        |        | 160 | → | 164 | -0.11853 |
|    |        |        |        | 160 | → | 166 | -0.17986 |
|    |        |        |        | 160 | → | 167 | 0.15206  |
|    |        |        |        | 160 | → | 168 | 0.41382  |
|    |        |        |        | 160 | → | 169 | 0.14578  |
|    |        |        |        | 160 | → | 175 | 0.1827   |
| 18 | 3.8442 | 322.52 | 0.0046 | 160 | → | 177 | -0.15246 |
|    |        |        |        | 157 | → | 173 | 0.11291  |
|    |        |        |        | 158 | → | 164 | 0.14104  |
|    |        |        |        | 158 | → | 165 | -0.14508 |
|    |        |        |        | 158 | → | 166 | 0.14212  |
|    |        |        |        | 158 | → | 173 | -0.16508 |
|    |        |        |        | 159 | → | 164 | 0.11351  |
|    |        |        |        | 159 | → | 166 | 0.11212  |
|    |        |        |        | 159 | → | 173 | -0.19141 |
|    |        |        |        | 160 | → | 165 | 0.11861  |
| 19 | 3.8605 | 321.16 | 0.0138 | 160 | → | 166 | 0.1917   |
|    |        |        |        | 160 | → | 167 | 0.41587  |
|    |        |        |        | 156 | → | 161 | 0.11427  |
|    |        |        |        | 158 | → | 165 | -0.12088 |

|    |        |        |        |     |   |     |          |
|----|--------|--------|--------|-----|---|-----|----------|
|    |        |        |        | 159 | → | 164 | 0.25815  |
|    |        |        |        | 159 | → | 165 | 0.4106   |
|    |        |        |        | 159 | → | 166 | 0.12026  |
|    |        |        |        | 159 | → | 167 | -0.12389 |
|    |        |        |        | 160 | → | 167 | -0.29937 |
|    |        |        |        | 160 | → | 168 | 0.13614  |
| 20 | 3.8708 | 320.3  | 0.0065 | 155 | → | 161 | -0.1169  |
|    |        |        |        | 157 | → | 173 | -0.13814 |
|    |        |        |        | 158 | → | 164 | 0.14241  |
|    |        |        |        | 158 | → | 173 | 0.17077  |
|    |        |        |        | 159 | → | 164 | 0.18178  |
|    |        |        |        | 159 | → | 165 | 0.13922  |
|    |        |        |        | 159 | → | 169 | 0.11354  |
|    |        |        |        | 159 | → | 173 | 0.22669  |
|    |        |        |        | 159 | → | 176 | -0.12111 |
|    |        |        |        | 160 | → | 167 | 0.30252  |
|    |        |        |        | 160 | → | 173 | -0.15085 |
|    |        |        |        | 160 | → | 176 | 0.12424  |
| 21 | 3.8871 | 318.96 | 0.0325 | 155 | → | 161 | 0.19721  |
|    |        |        |        | 156 | → | 161 | 0.37677  |
|    |        |        |        | 158 | → | 164 | -0.20319 |
|    |        |        |        | 159 | → | 164 | -0.17312 |
|    |        |        |        | 159 | → | 165 | 0.26742  |
|    |        |        |        | 159 | → | 166 | 0.113    |
|    |        |        |        | 160 | → | 167 | 0.1707   |
| 22 | 3.9104 | 317.06 | 0.0875 | 156 | → | 161 | 0.47908  |
|    |        |        |        | 156 | → | 162 | -0.36655 |
|    |        |        |        | 158 | → | 164 | 0.12107  |
|    |        |        |        | 159 | → | 165 | -0.2195  |
|    |        |        |        | 160 | → | 167 | -0.11531 |
| 23 | 3.9316 | 315.35 | 0.0582 | 155 | → | 161 | 0.531    |
|    |        |        |        | 156 | → | 162 | 0.30312  |
|    |        |        |        | 158 | → | 164 | 0.18048  |
|    |        |        |        | 159 | → | 165 | -0.15966 |
|    |        |        |        | 160 | → | 168 | -0.12174 |
| 24 | 3.9537 | 313.59 | 0.0617 | 155 | → | 161 | -0.33187 |
|    |        |        |        | 156 | → | 161 | 0.29609  |
|    |        |        |        | 156 | → | 162 | 0.47413  |
|    |        |        |        | 159 | → | 165 | -0.11706 |
| 25 | 3.956  | 313.41 | 0.0031 | 155 | → | 161 | 0.10851  |
|    |        |        |        | 158 | → | 164 | -0.26325 |
|    |        |        |        | 159 | → | 164 | 0.17866  |
|    |        |        |        | 159 | → | 165 | -0.17487 |
|    |        |        |        | 159 | → | 168 | -0.12504 |
|    |        |        |        | 159 | → | 173 | -0.10225 |
|    |        |        |        | 159 | → | 175 | -0.15864 |

|    |        |        |        |     |   |     |          |
|----|--------|--------|--------|-----|---|-----|----------|
|    |        |        |        | 159 | → | 177 | 0.1281   |
|    |        |        |        | 160 | → | 166 | -0.10096 |
|    |        |        |        | 160 | → | 167 | 0.10634  |
|    |        |        |        | 160 | → | 168 | 0.27024  |
|    |        |        |        | 160 | → | 169 | -0.17808 |
|    |        |        |        | 160 | → | 173 | -0.23079 |
|    |        |        |        | 160 | → | 175 | -0.13711 |
| 26 | 3.9836 | 311.24 | 0.0163 | 156 | → | 161 | 0.10358  |
|    |        |        |        | 157 | → | 164 | -0.10093 |
|    |        |        |        | 158 | → | 164 | 0.3595   |
|    |        |        |        | 158 | → | 165 | 0.28435  |
|    |        |        |        | 158 | → | 168 | 0.10547  |
|    |        |        |        | 159 | → | 166 | -0.14754 |
|    |        |        |        | 159 | → | 173 | -0.10299 |
|    |        |        |        | 160 | → | 168 | 0.26462  |
|    |        |        |        | 160 | → | 175 | -0.10695 |
|    |        |        |        | 160 | → | 176 | -0.10497 |
|    |        |        |        | 160 | → | 177 | 0.10757  |
| 27 | 4.0057 | 309.52 | 0.0069 | 157 | → | 165 | -0.15643 |
|    |        |        |        | 158 | → | 165 | 0.48049  |
|    |        |        |        | 158 | → | 167 | -0.12349 |
|    |        |        |        | 158 | → | 173 | -0.14062 |
|    |        |        |        | 158 | → | 176 | 0.10925  |
|    |        |        |        | 159 | → | 166 | 0.15434  |
|    |        |        |        | 160 | → | 173 | -0.11295 |
|    |        |        |        | 160 | → | 175 | 0.1096   |
|    |        |        |        | 160 | → | 176 | 0.13691  |
|    |        |        |        | 160 | → | 177 | -0.11972 |
| 28 | 4.0679 | 304.79 | 0.0278 | 158 | → | 173 | 0.12479  |
|    |        |        |        | 159 | → | 164 | -0.11758 |
|    |        |        |        | 159 | → | 165 | -0.20552 |
|    |        |        |        | 159 | → | 166 | 0.49382  |
|    |        |        |        | 159 | → | 168 | 0.15202  |
|    |        |        |        | 160 | → | 168 | 0.17113  |
|    |        |        |        | 160 | → | 169 | -0.14863 |
| 29 | 4.1057 | 301.98 | 0.0038 | 155 | → | 162 | -0.15196 |
|    |        |        |        | 155 | → | 163 | -0.25573 |
|    |        |        |        | 156 | → | 163 | 0.15478  |
|    |        |        |        | 157 | → | 168 | -0.11661 |
|    |        |        |        | 158 | → | 164 | -0.10037 |
|    |        |        |        | 158 | → | 166 | 0.47093  |
|    |        |        |        | 158 | → | 167 | -0.18394 |
|    |        |        |        | 158 | → | 168 | 0.16345  |
| 30 | 4.1341 | 299.91 | 0.0139 | 155 | → | 162 | 0.32601  |
|    |        |        |        | 155 | → | 163 | 0.3728   |
|    |        |        |        | 156 | → | 163 | -0.30147 |

|    |        |        |        |     |   |     |          |
|----|--------|--------|--------|-----|---|-----|----------|
|    |        |        |        | 158 | → | 164 | -0.12773 |
|    |        |        |        | 158 | → | 166 | 0.25377  |
|    |        |        |        | 158 | → | 168 | 0.10654  |
|    |        |        |        | 159 | → | 166 | -0.11284 |
| 31 | 4.1512 | 298.67 | 0.0204 | 154 | → | 163 | -0.12748 |
|    |        |        |        | 155 | → | 162 | 0.17728  |
|    |        |        |        | 155 | → | 163 | 0.21356  |
|    |        |        |        | 156 | → | 163 | 0.35216  |
|    |        |        |        | 158 | → | 168 | 0.10534  |
|    |        |        |        | 159 | → | 166 | 0.15412  |
|    |        |        |        | 159 | → | 167 | 0.2125   |
|    |        |        |        | 159 | → | 168 | -0.25522 |
|    |        |        |        | 160 | → | 169 | 0.2103   |
| 32 | 4.1755 | 296.93 | 0.0088 | 151 | → | 162 | -0.11248 |
|    |        |        |        | 155 | → | 162 | -0.11144 |
|    |        |        |        | 156 | → | 163 | -0.3527  |
|    |        |        |        | 159 | → | 165 | 0.12261  |
|    |        |        |        | 159 | → | 166 | 0.15701  |
|    |        |        |        | 159 | → | 167 | 0.4269   |
|    |        |        |        | 159 | → | 168 | -0.25005 |
| 33 | 4.2072 | 294.7  | 0.0016 | 154 | → | 162 | 0.20023  |
|    |        |        |        | 155 | → | 162 | 0.46582  |
|    |        |        |        | 155 | → | 163 | -0.27648 |
|    |        |        |        | 156 | → | 163 | 0.15576  |
|    |        |        |        | 159 | → | 167 | 0.15283  |
|    |        |        |        | 160 | → | 169 | -0.20994 |
| 34 | 4.2244 | 293.5  | 0.0325 | 155 | → | 162 | -0.18617 |
|    |        |        |        | 155 | → | 163 | 0.35568  |
|    |        |        |        | 156 | → | 163 | 0.24449  |
|    |        |        |        | 158 | → | 166 | 0.102    |
|    |        |        |        | 159 | → | 167 | 0.19456  |
|    |        |        |        | 159 | → | 168 | 0.10996  |
|    |        |        |        | 160 | → | 169 | -0.32749 |
| 35 | 4.2679 | 290.51 | 0.0049 | 152 | → | 163 | -0.13325 |
|    |        |        |        | 157 | → | 164 | 0.15722  |
|    |        |        |        | 157 | → | 165 | 0.15077  |
|    |        |        |        | 157 | → | 166 | -0.16338 |
|    |        |        |        | 158 | → | 167 | 0.34554  |
|    |        |        |        | 158 | → | 168 | 0.27916  |
|    |        |        |        | 159 | → | 167 | 0.22742  |
|    |        |        |        | 159 | → | 168 | 0.25575  |
| 36 | 4.2861 | 289.27 | 0.0065 | 154 | → | 161 | 0.11867  |
|    |        |        |        | 157 | → | 164 | -0.11237 |
|    |        |        |        | 157 | → | 165 | -0.11393 |
|    |        |        |        | 158 | → | 167 | -0.19846 |
|    |        |        |        | 158 | → | 168 | -0.11519 |

|    |        |        |        |     |   |     |          |
|----|--------|--------|--------|-----|---|-----|----------|
|    |        |        |        | 159 | → | 167 | 0.29251  |
|    |        |        |        | 159 | → | 168 | 0.38055  |
|    |        |        |        | 160 | → | 169 | 0.27526  |
|    |        |        |        | 160 | → | 173 | -0.10078 |
| 37 | 4.2987 | 288.42 | 0.0047 | 157 | → | 167 | 0.12432  |
|    |        |        |        | 157 | → | 168 | -0.14136 |
|    |        |        |        | 158 | → | 165 | -0.14232 |
|    |        |        |        | 158 | → | 166 | -0.29452 |
|    |        |        |        | 158 | → | 167 | -0.32256 |
|    |        |        |        | 158 | → | 168 | 0.40068  |
|    |        |        |        | 159 | → | 166 | -0.10092 |
|    |        |        |        | 160 | → | 169 | -0.11959 |
| 38 | 4.3343 | 286.05 | 0.0038 | 154 | → | 161 | 0.60524  |
|    |        |        |        | 154 | → | 162 | -0.24156 |
|    |        |        |        | 155 | → | 162 | 0.16199  |
| 39 | 4.3672 | 283.9  | 0.0026 | 154 | → | 161 | 0.27003  |
|    |        |        |        | 154 | → | 162 | 0.57206  |
|    |        |        |        | 155 | → | 162 | -0.15646 |
|    |        |        |        | 156 | → | 163 | 0.10907  |
|    |        |        |        | 157 | → | 164 | 0.12336  |
| 40 | 4.3886 | 282.52 | 0.0046 | 154 | → | 162 | -0.12869 |
|    |        |        |        | 157 | → | 164 | 0.52335  |
|    |        |        |        | 157 | → | 165 | 0.13079  |
|    |        |        |        | 157 | → | 167 | 0.17267  |
|    |        |        |        | 158 | → | 164 | 0.20856  |
|    |        |        |        | 158 | → | 167 | -0.23626 |

**Table S5.** TDDFT calculated transitions for *fac*-[Ru(Q3PzH)(Q3Pz)<sub>2</sub>].

| Excited State | Energy (eV) | Wavelength (nm) | f      | Transitions |   |     |          |
|---------------|-------------|-----------------|--------|-------------|---|-----|----------|
| 1             | 1.9402      | 639.03          | 0.0046 | 160         | → | 161 | 0.64529  |
|               |             |                 |        | 160         | → | 162 | -0.25531 |
| 2             | 2.0912      | 592.88          | 0.0716 | 160         | → | 161 | 0.27445  |
|               |             |                 |        | 160         | → | 162 | 0.60922  |
|               |             |                 |        | 160         | → | 163 | 0.20157  |
| 3             | 2.2749      | 545.02          | 0.0871 | 159         | → | 161 | -0.16369 |
|               |             |                 |        | 159         | → | 162 | 0.1151   |
|               |             |                 |        | 159         | → | 163 | 0.19381  |
|               |             |                 |        | 160         | → | 162 | -0.21516 |
|               |             |                 |        | 160         | → | 163 | 0.59334  |
| 4             | 2.4691      | 502.13          | 0.0046 | 158         | → | 161 | 0.53299  |
|               |             |                 |        | 158         | → | 162 | -0.17201 |
|               |             |                 |        | 158         | → | 163 | -0.11339 |
|               |             |                 |        | 159         | → | 161 | -0.25017 |
|               |             |                 |        | 159         | → | 162 | -0.29858 |
|               |             |                 |        | 159         | → | 163 | 0.10816  |
| 5             | 2.4856      | 498.81          | 0.0142 | 158         | → | 161 | 0.39239  |

|    |        |        |        |     |   |     |          |
|----|--------|--------|--------|-----|---|-----|----------|
|    |        |        |        | 159 | → | 161 | 0.28986  |
|    |        |        |        | 159 | → | 162 | 0.46926  |
|    |        |        |        | 159 | → | 163 | -0.13587 |
| 6  | 2.5626 | 483.82 | 0.061  | 158 | → | 161 | 0.13891  |
|    |        |        |        | 158 | → | 162 | 0.52468  |
|    |        |        |        | 159 | → | 161 | -0.37705 |
|    |        |        |        | 159 | → | 162 | 0.19029  |
|    |        |        |        | 159 | → | 163 | -0.1051  |
| 7  | 2.5816 | 480.27 | 0.0707 | 158 | → | 161 | 0.14075  |
|    |        |        |        | 158 | → | 162 | 0.31347  |
|    |        |        |        | 158 | → | 163 | 0.18759  |
|    |        |        |        | 159 | → | 161 | 0.33533  |
|    |        |        |        | 159 | → | 162 | -0.12133 |
|    |        |        |        | 159 | → | 163 | 0.45585  |
| 8  | 2.6364 | 470.28 | 0.0152 | 158 | → | 162 | -0.19993 |
|    |        |        |        | 158 | → | 163 | 0.65475  |
| 9  | 2.7411 | 452.32 | 0.0561 | 158 | → | 162 | -0.18115 |
|    |        |        |        | 159 | → | 161 | -0.22496 |
|    |        |        |        | 159 | → | 162 | 0.32409  |
|    |        |        |        | 159 | → | 163 | 0.43109  |
|    |        |        |        | 160 | → | 163 | -0.27658 |
| 10 | 3.0971 | 400.32 | 0.0075 | 157 | → | 161 | 0.69552  |
| 11 | 3.1574 | 392.68 | 0.0649 | 157 | → | 162 | 0.58825  |
|    |        |        |        | 157 | → | 163 | 0.34543  |
| 12 | 3.2099 | 386.25 | 0.0182 | 160 | → | 164 | 0.68664  |
| 13 | 3.2446 | 382.12 | 0.0032 | 160 | → | 165 | 0.66984  |
| 14 | 3.3196 | 373.49 | 0.0606 | 156 | → | 161 | 0.37494  |
|    |        |        |        | 156 | → | 162 | 0.48525  |
|    |        |        |        | 157 | → | 162 | -0.12055 |
|    |        |        |        | 157 | → | 163 | 0.2766   |
|    |        |        |        | 160 | → | 166 | -0.1176  |
| 15 | 3.3525 | 369.82 | 0.0078 | 156 | → | 161 | -0.19035 |
|    |        |        |        | 156 | → | 162 | -0.21288 |
|    |        |        |        | 157 | → | 162 | -0.32899 |
|    |        |        |        | 157 | → | 163 | 0.53186  |
| 16 | 3.444  | 360    | 0.0099 | 156 | → | 161 | 0.15432  |
|    |        |        |        | 160 | → | 166 | 0.6587   |
| 17 | 3.4633 | 357.99 | 0.0052 | 156 | → | 161 | 0.53863  |
|    |        |        |        | 156 | → | 162 | -0.44192 |
| 18 | 3.4707 | 357.23 | 0.0211 | 156 | → | 163 | 0.69445  |
| 19 | 3.5671 | 347.57 | 0.0004 | 159 | → | 164 | 0.64204  |
|    |        |        |        | 159 | → | 166 | 0.13188  |
|    |        |        |        | 159 | → | 167 | 0.15867  |
| 20 | 3.6097 | 343.47 | 0.0235 | 158 | → | 164 | 0.14943  |
|    |        |        |        | 159 | → | 164 | -0.12424 |
|    |        |        |        | 159 | → | 165 | 0.12389  |

|    |        |        |        |     |   |     |          |
|----|--------|--------|--------|-----|---|-----|----------|
|    |        |        |        | 160 | → | 167 | 0.615    |
|    |        |        |        | 160 | → | 168 | -0.11486 |
| 21 | 3.6631 | 338.46 | 0.0086 | 159 | → | 165 | 0.17163  |
|    |        |        |        | 160 | → | 165 | 0.13311  |
|    |        |        |        | 160 | → | 168 | 0.44195  |
|    |        |        |        | 160 | → | 169 | 0.3382   |
|    |        |        |        | 160 | → | 174 | 0.11588  |
|    |        |        |        | 160 | → | 176 | -0.23121 |
| 22 | 3.7396 | 331.54 | 0.0011 | 158 | → | 164 | -0.25136 |
|    |        |        |        | 159 | → | 165 | 0.56384  |
|    |        |        |        | 160 | → | 167 | -0.13298 |
|    |        |        |        | 160 | → | 168 | -0.18351 |
| 23 | 3.7645 | 329.35 | 0.0401 | 158 | → | 164 | 0.58791  |
|    |        |        |        | 158 | → | 167 | 0.13956  |
|    |        |        |        | 159 | → | 165 | 0.11898  |
|    |        |        |        | 160 | → | 167 | -0.21959 |
|    |        |        |        | 160 | → | 168 | -0.16056 |
| 24 | 3.819  | 324.65 | 0.0024 | 158 | → | 165 | 0.59889  |
|    |        |        |        | 158 | → | 169 | -0.10934 |
|    |        |        |        | 158 | → | 175 | 0.12515  |
|    |        |        |        | 160 | → | 169 | -0.22057 |
| 25 | 3.8345 | 323.34 | 0.0161 | 158 | → | 164 | -0.14446 |
|    |        |        |        | 158 | → | 165 | 0.2433   |
|    |        |        |        | 159 | → | 165 | -0.27432 |
|    |        |        |        | 160 | → | 168 | -0.25939 |
|    |        |        |        | 160 | → | 169 | 0.41161  |
|    |        |        |        | 160 | → | 175 | -0.18197 |
| 26 | 3.8508 | 321.97 | 0.0969 | 155 | → | 161 | 0.63629  |
|    |        |        |        | 155 | → | 162 | -0.14711 |
|    |        |        |        | 159 | → | 166 | -0.15253 |
|    |        |        |        | 159 | → | 167 | -0.12305 |
| 27 | 3.8924 | 318.53 | 0.0182 | 155 | → | 161 | 0.20993  |
|    |        |        |        | 159 | → | 164 | -0.16302 |
|    |        |        |        | 159 | → | 166 | 0.5703   |
|    |        |        |        | 159 | → | 167 | 0.27222  |
| 28 | 3.9636 | 312.81 | 0.0038 | 154 | → | 161 | -0.10886 |
|    |        |        |        | 155 | → | 162 | -0.20138 |
|    |        |        |        | 158 | → | 165 | -0.11463 |
|    |        |        |        | 158 | → | 166 | 0.32769  |
|    |        |        |        | 158 | → | 169 | -0.12617 |
|    |        |        |        | 158 | → | 175 | 0.17524  |
|    |        |        |        | 159 | → | 167 | -0.10776 |
|    |        |        |        | 159 | → | 176 | -0.11139 |
|    |        |        |        | 160 | → | 168 | -0.22176 |
|    |        |        |        | 160 | → | 169 | 0.11669  |
|    |        |        |        | 160 | → | 175 | 0.20172  |



|     |        |        |          |     |        |        |          |     |   |     |          |
|-----|--------|--------|----------|-----|--------|--------|----------|-----|---|-----|----------|
| 29  | 3.9744 | 311.96 | 0.0064   | 160 | →      | 176    | -0.16495 |     |   |     |          |
|     |        |        |          | 155 | →      | 162    | -0.14649 |     |   |     |          |
|     |        |        |          | 158 | →      | 165    | -0.15671 |     |   |     |          |
|     |        |        |          | 158 | →      | 166    | 0.26789  |     |   |     |          |
|     |        |        |          | 158 | →      | 169    | -0.12434 |     |   |     |          |
|     |        |        |          | 158 | →      | 175    | 0.12291  |     |   |     |          |
|     |        |        |          | 159 | →      | 166    | -0.14561 |     |   |     |          |
|     |        |        |          | 159 | →      | 167    | 0.32052  |     |   |     |          |
|     |        |        |          | 159 | →      | 168    | -0.15977 |     |   |     |          |
|     |        |        |          | 159 | →      | 175    | -0.11994 |     |   |     |          |
|     |        |        |          | 159 | →      | 176    | 0.17239  |     |   |     |          |
|     |        |        |          | 160 | →      | 168    | 0.15296  |     |   |     |          |
|     |        |        |          | 160 | →      | 175    | -0.1127  |     |   |     |          |
|     |        |        |          | 160 | →      | 176    | 0.11601  |     |   |     |          |
| 30  | 3.9931 | 310.5  | 0.0054   | 154 | →      | 161    | 0.40598  |     |   |     |          |
|     |        |        |          | 155 | →      | 161    | 0.1211   |     |   |     |          |
|     |        |        |          | 155 | →      | 162    | 0.35382  |     |   |     |          |
|     |        |        |          | 155 | →      | 163    | 0.12967  |     |   |     |          |
|     |        |        |          | 158 | →      | 166    | 0.29926  |     |   |     |          |
|     |        |        |          | 158 | →      | 167    | 0.1548   |     |   |     |          |
| 31  | 4.0182 | 308.56 | 0.008    | 154 | →      | 161    | 0.27553  |     |   |     |          |
|     |        |        |          | 158 | →      | 166    | -0.13709 |     |   |     |          |
|     |        |        |          | 158 | →      | 167    | -0.21105 |     |   |     |          |
|     |        |        |          | 158 | →      | 175    | 0.11194  |     |   |     |          |
|     |        |        |          | 159 | →      | 166    | -0.19556 |     |   |     |          |
|     |        |        |          | 159 | →      | 167    | 0.29353  |     |   |     |          |
|     |        |        |          | 159 | →      | 168    | 0.10927  |     |   |     |          |
|     |        |        |          | 159 | →      | 169    | 0.163    |     |   |     |          |
|     |        |        |          | 159 | →      | 175    | -0.14081 |     |   |     |          |
|     |        |        |          | 159 | →      | 176    | -0.10566 |     |   |     |          |
|     |        |        |          | 160 | →      | 169    | 0.18277  |     |   |     |          |
|     |        |        |          | 160 | →      | 175    | 0.14263  |     |   |     |          |
|     |        |        |          | 32  | 4.0231 | 308.18 | 0.003    | 154 | → | 161 | 0.4472   |
|     |        |        |          |     |        |        |          | 154 | → | 162 | -0.18881 |
| 154 | →      | 163    | -0.12423 |     |        |        |          |     |   |     |          |
| 155 | →      | 162    | -0.40607 |     |        |        |          |     |   |     |          |
| 159 | →      | 167    | -0.1674  |     |        |        |          |     |   |     |          |
| 33  | 4.0491 | 306.2  | 0.0041   | 155 | →      | 162    | -0.10503 |     |   |     |          |
|     |        |        |          | 158 | →      | 165    | 0.13133  |     |   |     |          |
|     |        |        |          | 158 | →      | 166    | 0.20259  |     |   |     |          |
|     |        |        |          | 158 | →      | 167    | 0.25324  |     |   |     |          |
|     |        |        |          | 158 | →      | 168    | 0.13579  |     |   |     |          |
|     |        |        |          | 158 | →      | 169    | 0.19238  |     |   |     |          |
|     |        |        |          | 158 | →      | 175    | -0.22746 |     |   |     |          |
|     |        |        |          | 158 | →      | 176    | -0.1561  |     |   |     |          |
|     |        |        |          | 159 | →      | 165    | 0.10039  |     |   |     |          |

|    |        |        |        |     |   |     |          |
|----|--------|--------|--------|-----|---|-----|----------|
|    |        |        |        | 159 | → | 167 | 0.123    |
|    |        |        |        | 159 | → | 168 | 0.17388  |
|    |        |        |        | 159 | → | 169 | 0.16355  |
|    |        |        |        | 159 | → | 176 | -0.14992 |
|    |        |        |        | 160 | → | 168 | 0.11694  |
|    |        |        |        | 160 | → | 176 | 0.15659  |
| 34 | 4.0915 | 303.03 | 0.0042 | 154 | → | 162 | 0.33997  |
|    |        |        |        | 154 | → | 163 | 0.11069  |
|    |        |        |        | 155 | → | 162 | -0.27191 |
|    |        |        |        | 155 | → | 163 | 0.29723  |
|    |        |        |        | 159 | → | 167 | 0.22577  |
|    |        |        |        | 159 | → | 169 | -0.12948 |
|    |        |        |        | 159 | → | 175 | 0.15235  |
|    |        |        |        | 160 | → | 168 | -0.12571 |
|    |        |        |        | 160 | → | 176 | -0.16688 |
| 35 | 4.1082 | 301.8  | 0.0004 | 154 | → | 162 | -0.24518 |
|    |        |        |        | 155 | → | 163 | -0.27925 |
|    |        |        |        | 158 | → | 166 | -0.14785 |
|    |        |        |        | 158 | → | 167 | 0.30009  |
|    |        |        |        | 158 | → | 175 | -0.13111 |
|    |        |        |        | 159 | → | 166 | -0.11435 |
|    |        |        |        | 159 | → | 167 | 0.19411  |
|    |        |        |        | 159 | → | 169 | -0.11099 |
|    |        |        |        | 159 | → | 175 | 0.18062  |
|    |        |        |        | 160 | → | 169 | -0.12989 |
|    |        |        |        | 160 | → | 176 | -0.15905 |
| 36 | 4.1573 | 298.23 | 0.0072 | 154 | → | 162 | 0.18499  |
|    |        |        |        | 158 | → | 166 | -0.31781 |
|    |        |        |        | 158 | → | 167 | 0.44716  |
|    |        |        |        | 158 | → | 168 | -0.10965 |
|    |        |        |        | 158 | → | 175 | 0.17843  |
|    |        |        |        | 159 | → | 169 | 0.11225  |
|    |        |        |        | 159 | → | 175 | -0.14176 |
| 37 | 4.1937 | 295.64 | 0.0027 | 153 | → | 161 | 0.11951  |
|    |        |        |        | 153 | → | 162 | 0.17432  |
|    |        |        |        | 154 | → | 162 | 0.40239  |
|    |        |        |        | 154 | → | 163 | -0.27925 |
|    |        |        |        | 155 | → | 163 | -0.38389 |
|    |        |        |        | 157 | → | 164 | 0.12092  |
| 38 | 4.225  | 293.45 | 0.0007 | 153 | → | 163 | 0.13193  |
|    |        |        |        | 154 | → | 163 | 0.12781  |
|    |        |        |        | 157 | → | 164 | 0.41048  |
|    |        |        |        | 157 | → | 165 | -0.2989  |
|    |        |        |        | 157 | → | 166 | -0.24017 |
|    |        |        |        | 158 | → | 168 | -0.10928 |
|    |        |        |        | 159 | → | 168 | 0.19424  |

|     |        |        |          |     |        |        |          |
|-----|--------|--------|----------|-----|--------|--------|----------|
| 39  | 4.2631 | 290.83 | 0.0044   | 154 | →      | 162    | 0.11931  |
|     |        |        |          | 154 | →      | 163    | 0.12956  |
|     |        |        |          | 155 | →      | 163    | -0.15574 |
|     |        |        |          | 157 | →      | 164    | -0.19894 |
|     |        |        |          | 158 | →      | 168    | -0.28527 |
|     |        |        |          | 159 | →      | 168    | 0.4046   |
|     |        |        |          | 160 | →      | 169    | -0.10211 |
|     |        |        |          | 160 | →      | 171    | -0.10306 |
|     |        |        |          | 160 | →      | 175    | -0.21343 |
|     |        |        |          | 40  | 4.3051 | 287.99 | 0.0036   |
| 154 | →      | 163    | 0.50613  |     |        |        |          |
| 155 | →      | 163    | -0.29372 |     |        |        |          |
| 156 | →      | 165    | -0.11622 |     |        |        |          |
| 159 | →      | 168    | -0.25592 |     |        |        |          |
| 159 | →      | 169    | 0.10842  |     |        |        |          |

**Table S6.** TDDFT calculated transitions for *fac*-[Ru(Q3Pz)<sub>3</sub>].

| Excited State | Energy (eV) | Wavelength (nm) | f      | Transitions |   |     |          |
|---------------|-------------|-----------------|--------|-------------|---|-----|----------|
| 1             | 1.9016      | 651.98          | 0.0087 | 160         | → | 162 | 0.69055  |
| 2             | 1.9295      | 642.58          | 0.0578 | 160         | → | 161 | 0.66462  |
|               |             |                 |        | 160         | → | 163 | 0.18093  |
| 3             | 2.1123      | 586.95          | 0.0546 | 158         | → | 162 | 0.12946  |
|               |             |                 |        | 158         | → | 163 | -0.11111 |
|               |             |                 |        | 159         | → | 161 | 0.478    |
|               |             |                 |        | 159         | → | 162 | -0.10123 |
|               |             |                 |        | 160         | → | 161 | 0.18884  |
| 4             | 2.1537      | 575.67          | 0.0048 | 160         | → | 163 | -0.41893 |
|               |             |                 |        | 158         | → | 161 | -0.12106 |
|               |             |                 |        | 159         | → | 161 | 0.21652  |
|               |             |                 |        | 159         | → | 162 | 0.47191  |
| 5             | 2.1846      | 567.53          | 0.0435 | 159         | → | 163 | -0.44071 |
|               |             |                 |        | 158         | → | 162 | -0.21594 |
|               |             |                 |        | 158         | → | 163 | 0.1778   |
|               |             |                 |        | 159         | → | 161 | 0.43178  |
|               |             |                 |        | 159         | → | 162 | -0.26191 |
| 6             | 2.2314      | 555.62          | 0.0006 | 160         | → | 161 | -0.10282 |
|               |             |                 |        | 160         | → | 163 | 0.37818  |
|               |             |                 |        | 158         | → | 161 | -0.11708 |
|               |             |                 |        | 158         | → | 162 | -0.20073 |
|               |             |                 |        | 159         | → | 162 | 0.37985  |
| 7             | 2.2699      | 546.21          | 0.0122 | 159         | → | 163 | 0.52618  |
|               |             |                 |        | 158         | → | 161 | 0.6073   |
|               |             |                 |        | 158         | → | 163 | -0.2948  |
|               |             |                 |        | 159         | → | 162 | 0.12975  |
| 8             | 2.3861      | 519.61          | 0.1233 | 158         | → | 161 | 0.28431  |

|    |        |        |        |     |   |     |          |
|----|--------|--------|--------|-----|---|-----|----------|
|    |        |        |        | 158 | → | 163 | 0.58686  |
|    |        |        |        | 160 | → | 163 | -0.20784 |
| 9  | 2.5923 | 478.27 | 0.0756 | 158 | → | 162 | 0.58413  |
|    |        |        |        | 159 | → | 161 | 0.12138  |
|    |        |        |        | 159 | → | 162 | 0.14428  |
|    |        |        |        | 160 | → | 163 | 0.28266  |
| 10 | 3.0508 | 406.4  | 0.0478 | 155 | → | 161 | -0.17166 |
|    |        |        |        | 157 | → | 161 | 0.58304  |
|    |        |        |        | 157 | → | 162 | -0.20629 |
|    |        |        |        | 160 | → | 164 | -0.23432 |
| 11 | 3.0523 | 406.2  | 0.0046 | 157 | → | 161 | 0.2169   |
|    |        |        |        | 160 | → | 164 | 0.64514  |
| 12 | 3.1479 | 393.87 | 0.0689 | 155 | → | 162 | -0.11096 |
|    |        |        |        | 156 | → | 161 | 0.34023  |
|    |        |        |        | 157 | → | 161 | -0.12183 |
|    |        |        |        | 157 | → | 162 | -0.32179 |
|    |        |        |        | 157 | → | 163 | 0.4742   |
| 13 | 3.1594 | 392.43 | 0.0544 | 155 | → | 161 | 0.26088  |
|    |        |        |        | 155 | → | 163 | 0.13152  |
|    |        |        |        | 156 | → | 161 | 0.39259  |
|    |        |        |        | 156 | → | 162 | -0.22838 |
|    |        |        |        | 156 | → | 163 | 0.23189  |
|    |        |        |        | 157 | → | 161 | 0.17982  |
|    |        |        |        | 157 | → | 162 | 0.14163  |
|    |        |        |        | 157 | → | 163 | -0.12543 |
|    |        |        |        | 160 | → | 165 | 0.25207  |
|    |        |        |        | 160 | → | 166 | -0.10539 |
| 14 | 3.1834 | 389.47 | 0.0469 | 155 | → | 162 | 0.10888  |
|    |        |        |        | 156 | → | 161 | -0.19821 |
|    |        |        |        | 156 | → | 163 | -0.10235 |
|    |        |        |        | 157 | → | 163 | 0.16755  |
|    |        |        |        | 160 | → | 165 | 0.59925  |
|    |        |        |        | 160 | → | 166 | -0.1273  |
| 15 | 3.1907 | 388.58 | 0.0574 | 155 | → | 161 | 0.30092  |
|    |        |        |        | 155 | → | 162 | 0.35663  |
|    |        |        |        | 155 | → | 163 | -0.10769 |
|    |        |        |        | 156 | → | 161 | -0.1112  |
|    |        |        |        | 156 | → | 162 | -0.13481 |
|    |        |        |        | 157 | → | 161 | 0.10382  |
|    |        |        |        | 157 | → | 162 | 0.22653  |
|    |        |        |        | 157 | → | 163 | 0.35516  |
|    |        |        |        | 160 | → | 165 | -0.15244 |
|    |        |        |        | 160 | → | 166 | 0.10936  |
| 16 | 3.2402 | 382.65 | 0.0064 | 155 | → | 161 | -0.32717 |
|    |        |        |        | 155 | → | 162 | 0.20369  |
|    |        |        |        | 155 | → | 163 | 0.15271  |

|    |        |        |        |     |   |     |          |
|----|--------|--------|--------|-----|---|-----|----------|
|    |        |        |        | 156 | → | 161 | 0.28728  |
|    |        |        |        | 156 | → | 162 | 0.31252  |
|    |        |        |        | 157 | → | 162 | 0.34633  |
| 17 | 3.2518 | 381.28 | 0.0188 | 155 | → | 161 | 0.35563  |
|    |        |        |        | 155 | → | 163 | -0.20204 |
|    |        |        |        | 156 | → | 162 | 0.53447  |
| 18 | 3.2904 | 376.81 | 0.0018 | 157 | → | 162 | -0.10593 |
|    |        |        |        | 160 | → | 165 | 0.16899  |
|    |        |        |        | 160 | → | 166 | 0.64254  |
| 19 | 3.3352 | 371.74 | 0.0076 | 155 | → | 162 | 0.50845  |
|    |        |        |        | 156 | → | 161 | 0.10911  |
|    |        |        |        | 157 | → | 161 | -0.11743 |
|    |        |        |        | 157 | → | 162 | -0.36471 |
|    |        |        |        | 157 | → | 163 | -0.21392 |
| 20 | 3.3612 | 368.87 | 0.0029 | 158 | → | 164 | -0.11735 |
|    |        |        |        | 159 | → | 164 | 0.67607  |
| 21 | 3.3972 | 364.96 | 0.0056 | 155 | → | 163 | 0.55642  |
|    |        |        |        | 156 | → | 161 | -0.22132 |
|    |        |        |        | 156 | → | 162 | 0.13871  |
|    |        |        |        | 156 | → | 163 | 0.25219  |
|    |        |        |        | 157 | → | 163 | 0.17275  |
| 22 | 3.3997 | 364.69 | 0.0037 | 155 | → | 161 | -0.20833 |
|    |        |        |        | 155 | → | 162 | 0.14627  |
|    |        |        |        | 155 | → | 163 | -0.25144 |
|    |        |        |        | 156 | → | 163 | 0.57938  |
|    |        |        |        | 157 | → | 161 | -0.10573 |
| 23 | 3.4532 | 359.04 | 0.0003 | 158 | → | 164 | 0.64294  |
|    |        |        |        | 158 | → | 165 | -0.10729 |
|    |        |        |        | 159 | → | 164 | 0.11212  |
|    |        |        |        | 159 | → | 165 | -0.1357  |
|    |        |        |        | 159 | → | 166 | -0.1028  |
| 24 | 3.4937 | 354.88 | 0.0016 | 158 | → | 164 | 0.12722  |
|    |        |        |        | 159 | → | 165 | 0.67762  |
| 25 | 3.5681 | 347.48 | 0.0091 | 158 | → | 165 | 0.64823  |
|    |        |        |        | 160 | → | 169 | 0.16206  |
| 26 | 3.6025 | 344.16 | 0.0042 | 158 | → | 165 | -0.17139 |
|    |        |        |        | 159 | → | 166 | 0.543    |
|    |        |        |        | 160 | → | 167 | -0.17074 |
|    |        |        |        | 160 | → | 169 | 0.29871  |
|    |        |        |        | 160 | → | 175 | 0.11205  |
| 27 | 3.6306 | 341.5  | 0.0038 | 158 | → | 164 | -0.15633 |
|    |        |        |        | 158 | → | 165 | -0.11615 |
|    |        |        |        | 158 | → | 166 | 0.16738  |
|    |        |        |        | 159 | → | 166 | -0.32504 |
|    |        |        |        | 160 | → | 168 | -0.12748 |
|    |        |        |        | 160 | → | 169 | 0.44842  |

|    |        |        |        |     |   |     |          |
|----|--------|--------|--------|-----|---|-----|----------|
|    |        |        |        | 160 | → | 174 | -0.15438 |
|    |        |        |        | 160 | → | 175 | 0.11929  |
| 28 | 3.6829 | 336.65 | 0.0084 | 160 | → | 167 | 0.31472  |
|    |        |        |        | 160 | → | 168 | 0.54851  |
|    |        |        |        | 160 | → | 169 | 0.15382  |
|    |        |        |        | 160 | → | 175 | 0.13867  |
| 29 | 3.6927 | 335.76 | 0.0118 | 158 | → | 166 | 0.64486  |
|    |        |        |        | 159 | → | 166 | 0.12706  |
|    |        |        |        | 160 | → | 169 | -0.12179 |
| 30 | 3.7273 | 332.64 | 0.0551 | 154 | → | 162 | 0.10159  |
|    |        |        |        | 159 | → | 166 | 0.12185  |
|    |        |        |        | 159 | → | 169 | -0.14458 |
|    |        |        |        | 160 | → | 167 | 0.50926  |
|    |        |        |        | 160 | → | 168 | -0.35641 |
|    |        |        |        | 160 | → | 169 | 0.11034  |
| 31 | 3.8092 | 325.49 | 0.0017 | 158 | → | 174 | -0.1562  |
|    |        |        |        | 159 | → | 166 | -0.1392  |
|    |        |        |        | 159 | → | 167 | 0.22769  |
|    |        |        |        | 159 | → | 168 | 0.17591  |
|    |        |        |        | 159 | → | 169 | -0.3138  |
|    |        |        |        | 159 | → | 174 | 0.34214  |
|    |        |        |        | 160 | → | 167 | -0.19797 |
|    |        |        |        | 160 | → | 175 | 0.14591  |
| 32 | 3.9102 | 317.08 | 0.0141 | 154 | → | 161 | 0.59652  |
|    |        |        |        | 154 | → | 162 | -0.12935 |
|    |        |        |        | 154 | → | 163 | 0.16388  |
|    |        |        |        | 159 | → | 167 | 0.1317   |
|    |        |        |        | 159 | → | 169 | -0.12715 |
| 33 | 3.9357 | 315.02 | 0.0144 | 154 | → | 161 | 0.24183  |
|    |        |        |        | 158 | → | 167 | -0.23938 |
|    |        |        |        | 158 | → | 169 | 0.23605  |
|    |        |        |        | 158 | → | 174 | -0.17341 |
|    |        |        |        | 159 | → | 168 | 0.29633  |
|    |        |        |        | 159 | → | 169 | 0.18901  |
|    |        |        |        | 159 | → | 175 | 0.18115  |
|    |        |        |        | 160 | → | 169 | 0.15973  |
|    |        |        |        | 160 | → | 174 | 0.19267  |
| 34 | 3.949  | 313.96 | 0.0158 | 154 | → | 162 | -0.10566 |
|    |        |        |        | 159 | → | 167 | 0.59343  |
|    |        |        |        | 159 | → | 168 | -0.14132 |
|    |        |        |        | 159 | → | 169 | 0.20577  |
| 35 | 3.9741 | 311.98 | 0.0133 | 154 | → | 162 | 0.34982  |
|    |        |        |        | 154 | → | 163 | -0.13138 |
|    |        |        |        | 158 | → | 167 | 0.24757  |
|    |        |        |        | 158 | → | 174 | 0.16639  |
|    |        |        |        | 158 | → | 175 | 0.20649  |

|    |        |        |        |  |     |   |     |          |
|----|--------|--------|--------|--|-----|---|-----|----------|
|    |        |        |        |  | 159 | → | 168 | 0.18169  |
|    |        |        |        |  | 160 | → | 169 | -0.10251 |
|    |        |        |        |  | 160 | → | 175 | 0.24757  |
| 36 | 3.9818 | 311.38 | 0.0029 |  | 154 | → | 162 | -0.20918 |
|    |        |        |        |  | 154 | → | 163 | 0.19829  |
|    |        |        |        |  | 158 | → | 168 | 0.25906  |
|    |        |        |        |  | 158 | → | 169 | 0.21486  |
|    |        |        |        |  | 158 | → | 175 | 0.23669  |
|    |        |        |        |  | 159 | → | 167 | -0.13464 |
|    |        |        |        |  | 159 | → | 168 | -0.23019 |
|    |        |        |        |  | 160 | → | 175 | 0.27647  |
| 37 | 4.0183 | 308.55 | 0.0067 |  | 154 | → | 162 | 0.47517  |
|    |        |        |        |  | 158 | → | 167 | -0.3102  |
|    |        |        |        |  | 159 | → | 168 | -0.2873  |
|    |        |        |        |  | 160 | → | 167 | -0.11208 |
| 38 | 4.0557 | 305.7  | 0.0067 |  | 154 | → | 162 | 0.11696  |
|    |        |        |        |  | 158 | → | 167 | 0.44847  |
|    |        |        |        |  | 158 | → | 168 | -0.17522 |
|    |        |        |        |  | 158 | → | 169 | 0.26688  |
|    |        |        |        |  | 158 | → | 174 | -0.15574 |
|    |        |        |        |  | 159 | → | 168 | -0.23425 |
| 39 | 4.0727 | 304.43 | 0.0064 |  | 152 | → | 161 | 0.14162  |
|    |        |        |        |  | 153 | → | 161 | -0.19791 |
|    |        |        |        |  | 154 | → | 162 | 0.11823  |
|    |        |        |        |  | 154 | → | 163 | 0.54883  |
|    |        |        |        |  | 158 | → | 167 | 0.10213  |
|    |        |        |        |  | 159 | → | 168 | 0.22743  |
|    |        |        |        |  | 160 | → | 175 | -0.10413 |
| 40 | 4.1041 | 302.1  | 0.0073 |  | 148 | → | 163 | 0.12528  |
|    |        |        |        |  | 155 | → | 164 | -0.1023  |
|    |        |        |        |  | 155 | → | 165 | -0.11287 |
|    |        |        |        |  | 157 | → | 164 | 0.55468  |
|    |        |        |        |  | 157 | → | 165 | 0.23259  |
|    |        |        |        |  | 159 | → | 168 | -0.11502 |

**Table S7.** TDDFT calculated transitions for *mer*-[Ru(Q3PzH)<sub>3</sub>]<sup>2+</sup>.

| Excited State | Energy (eV) | Wavelength (nm) | f      | Transitions |   |     |          |
|---------------|-------------|-----------------|--------|-------------|---|-----|----------|
| 1             | 2.731       | 453.99          | 0.1438 | 159         | → | 161 | 0.14756  |
|               |             |                 |        | 160         | → | 161 | 0.66451  |
|               |             |                 |        | 160         | → | 162 | 0.14543  |
| 2             | 2.8101      | 441.21          | 0.0175 | 159         | → | 161 | -0.1347  |
|               |             |                 |        | 160         | → | 161 | -0.12092 |
|               |             |                 |        | 160         | → | 162 | 0.66208  |
|               |             |                 |        | 160         | → | 163 | 0.13349  |
| 3             | 2.8521      | 434.72          | 0.0561 | 159         | → | 161 | 0.64847  |
|               |             |                 |        | 160         | → | 161 | -0.16601 |

|    |        |        |        |     |   |     |          |
|----|--------|--------|--------|-----|---|-----|----------|
|    |        |        |        | 160 | → | 162 | 0.12942  |
|    |        |        |        | 160 | → | 163 | -0.15037 |
| 4  | 2.9389 | 421.87 | 0.0303 | 158 | → | 161 | -0.29867 |
|    |        |        |        | 159 | → | 161 | 0.1245   |
|    |        |        |        | 159 | → | 162 | -0.26671 |
|    |        |        |        | 159 | → | 163 | 0.27546  |
|    |        |        |        | 160 | → | 163 | 0.47159  |
| 5  | 2.9549 | 419.59 | 0.0096 | 158 | → | 161 | 0.53195  |
|    |        |        |        | 158 | → | 162 | 0.14898  |
|    |        |        |        | 159 | → | 162 | -0.41028 |
| 6  | 2.9876 | 415    | 0.03   | 158 | → | 161 | 0.153    |
|    |        |        |        | 159 | → | 162 | 0.17915  |
|    |        |        |        | 159 | → | 163 | 0.62369  |
|    |        |        |        | 160 | → | 163 | -0.16043 |
| 7  | 3.0211 | 410.4  | 0.0034 | 158 | → | 161 | 0.27513  |
|    |        |        |        | 158 | → | 162 | -0.3027  |
|    |        |        |        | 158 | → | 163 | -0.22086 |
|    |        |        |        | 159 | → | 162 | 0.35481  |
|    |        |        |        | 159 | → | 163 | -0.12157 |
|    |        |        |        | 160 | → | 163 | 0.34007  |
| 8  | 3.0962 | 400.43 | 0.0155 | 158 | → | 162 | -0.37113 |
|    |        |        |        | 158 | → | 163 | 0.56929  |
| 9  | 3.2321 | 383.61 | 0.105  | 158 | → | 162 | 0.46789  |
|    |        |        |        | 158 | → | 163 | 0.30806  |
|    |        |        |        | 159 | → | 162 | 0.2873   |
|    |        |        |        | 160 | → | 163 | 0.24396  |
| 10 | 3.5989 | 344.51 | 0.0016 | 158 | → | 172 | 0.15121  |
|    |        |        |        | 158 | → | 174 | 0.12216  |
|    |        |        |        | 159 | → | 175 | -0.10007 |
|    |        |        |        | 160 | → | 164 | 0.14697  |
|    |        |        |        | 160 | → | 165 | -0.26368 |
|    |        |        |        | 160 | → | 166 | 0.18571  |
|    |        |        |        | 160 | → | 168 | 0.19788  |
|    |        |        |        | 160 | → | 170 | -0.11003 |
|    |        |        |        | 160 | → | 171 | -0.15001 |
|    |        |        |        | 160 | → | 172 | 0.27206  |
|    |        |        |        | 160 | → | 173 | -0.1548  |
|    |        |        |        | 160 | → | 174 | 0.2213   |
| 11 | 3.7469 | 330.9  | 0.0046 | 157 | → | 161 | 0.29799  |
|    |        |        |        | 158 | → | 172 | -0.13332 |
|    |        |        |        | 158 | → | 174 | -0.10889 |
|    |        |        |        | 159 | → | 165 | 0.18962  |
|    |        |        |        | 159 | → | 168 | -0.10191 |
|    |        |        |        | 159 | → | 172 | -0.20676 |
|    |        |        |        | 159 | → | 173 | 0.15912  |
|    |        |        |        | 159 | → | 174 | -0.16129 |



|    |        |        |        |     |   |     |          |
|----|--------|--------|--------|-----|---|-----|----------|
|    |        |        |        | 159 | → | 175 | -0.12962 |
|    |        |        |        | 160 | → | 164 | -0.14224 |
|    |        |        |        | 160 | → | 165 | -0.14136 |
|    |        |        |        | 160 | → | 175 | 0.18755  |
| 12 | 3.7635 | 329.44 | 0.0014 | 157 | → | 161 | 0.61624  |
|    |        |        |        | 159 | → | 172 | 0.10317  |
| 13 | 3.7929 | 326.88 | 0.0016 | 158 | → | 172 | -0.12215 |
|    |        |        |        | 160 | → | 164 | 0.592    |
|    |        |        |        | 160 | → | 165 | 0.16475  |
|    |        |        |        | 160 | → | 166 | 0.1066   |
| 14 | 3.8964 | 318.2  | 0.0537 | 156 | → | 161 | -0.2411  |
|    |        |        |        | 157 | → | 162 | -0.12267 |
|    |        |        |        | 157 | → | 163 | 0.25336  |
|    |        |        |        | 158 | → | 171 | 0.15746  |
|    |        |        |        | 158 | → | 172 | -0.11623 |
|    |        |        |        | 158 | → | 175 | 0.19144  |
|    |        |        |        | 159 | → | 171 | -0.11498 |
|    |        |        |        | 159 | → | 175 | -0.1809  |
|    |        |        |        | 160 | → | 164 | -0.12317 |
|    |        |        |        | 160 | → | 171 | -0.16847 |
|    |        |        |        | 160 | → | 172 | 0.11313  |
|    |        |        |        | 160 | → | 175 | -0.23647 |
| 15 | 3.8989 | 318    | 0.1532 | 155 | → | 161 | 0.11994  |
|    |        |        |        | 156 | → | 161 | -0.30244 |
|    |        |        |        | 157 | → | 162 | -0.23348 |
|    |        |        |        | 157 | → | 163 | 0.40818  |
|    |        |        |        | 158 | → | 175 | -0.11877 |
|    |        |        |        | 159 | → | 175 | 0.12752  |
|    |        |        |        | 160 | → | 164 | 0.15475  |
|    |        |        |        | 160 | → | 171 | 0.10834  |
|    |        |        |        | 160 | → | 175 | 0.12169  |
| 16 | 3.9306 | 315.43 | 0.0298 | 156 | → | 161 | 0.13949  |
|    |        |        |        | 156 | → | 162 | 0.10276  |
|    |        |        |        | 157 | → | 162 | -0.10613 |
|    |        |        |        | 158 | → | 171 | -0.11029 |
|    |        |        |        | 158 | → | 172 | 0.1692   |
|    |        |        |        | 158 | → | 174 | 0.13436  |
|    |        |        |        | 159 | → | 164 | -0.11201 |
|    |        |        |        | 159 | → | 165 | 0.15542  |
|    |        |        |        | 159 | → | 172 | -0.12069 |
|    |        |        |        | 160 | → | 165 | 0.4495   |
|    |        |        |        | 160 | → | 169 | 0.10594  |
| 17 | 3.9451 | 314.27 | 0.0094 | 156 | → | 161 | 0.50031  |
|    |        |        |        | 156 | → | 162 | 0.14841  |
|    |        |        |        | 157 | → | 162 | -0.35486 |
|    |        |        |        | 157 | → | 163 | 0.14705  |

|    |        |        |        |     |   |     |          |
|----|--------|--------|--------|-----|---|-----|----------|
| 18 | 3.9877 | 310.92 | 0.0215 | 160 | → | 165 | -0.14582 |
|    |        |        |        | 155 | → | 161 | 0.1239   |
|    |        |        |        | 156 | → | 161 | 0.2357   |
|    |        |        |        | 156 | → | 162 | -0.21529 |
|    |        |        |        | 157 | → | 162 | 0.45182  |
| 19 | 4.0153 | 308.78 | 0.0403 | 157 | → | 163 | 0.40739  |
|    |        |        |        | 155 | → | 162 | 0.19343  |
|    |        |        |        | 156 | → | 162 | 0.52007  |
|    |        |        |        | 157 | → | 162 | 0.25583  |
|    |        |        |        | 159 | → | 164 | 0.205    |
| 20 | 4.0243 | 308.09 | 0.0344 | 160 | → | 166 | -0.1737  |
|    |        |        |        | 156 | → | 162 | 0.26391  |
|    |        |        |        | 159 | → | 164 | -0.38547 |
|    |        |        |        | 160 | → | 166 | 0.38661  |
|    |        |        |        | 160 | → | 168 | 0.13893  |
| 21 | 4.058  | 305.53 | 0.0211 | 159 | → | 164 | 0.45275  |
|    |        |        |        | 159 | → | 165 | 0.14787  |
|    |        |        |        | 159 | → | 166 | 0.11176  |
|    |        |        |        | 159 | → | 175 | 0.12493  |
|    |        |        |        | 160 | → | 166 | 0.40053  |
| 22 | 4.1149 | 301.31 | 0.0075 | 155 | → | 161 | 0.61142  |
|    |        |        |        | 156 | → | 163 | 0.20125  |
|    |        |        |        | 157 | → | 163 | -0.23146 |
| 23 | 4.124  | 300.64 | 0.0135 | 156 | → | 163 | 0.40883  |
|    |        |        |        | 158 | → | 164 | 0.21713  |
|    |        |        |        | 158 | → | 165 | -0.16258 |
|    |        |        |        | 159 | → | 164 | 0.12314  |
|    |        |        |        | 159 | → | 165 | -0.20227 |
|    |        |        |        | 159 | → | 166 | -0.31141 |
|    |        |        |        | 159 | → | 168 | -0.10515 |
| 24 | 4.1395 | 299.52 | 0.0129 | 155 | → | 161 | -0.16281 |
|    |        |        |        | 156 | → | 163 | 0.45448  |
|    |        |        |        | 158 | → | 164 | -0.40282 |
|    |        |        |        | 158 | → | 167 | -0.11004 |
|    |        |        |        | 159 | → | 166 | 0.1522   |
| 25 | 4.1513 | 298.66 | 0.0146 | 156 | → | 163 | 0.2141   |
|    |        |        |        | 158 | → | 164 | 0.36564  |
|    |        |        |        | 158 | → | 165 | 0.13279  |
|    |        |        |        | 158 | → | 166 | 0.13753  |
|    |        |        |        | 159 | → | 165 | 0.28811  |
|    |        |        |        | 159 | → | 166 | 0.24262  |
|    |        |        |        | 160 | → | 165 | -0.10434 |
|    |        |        |        | 160 | → | 167 | -0.24856 |
| 26 | 4.1681 | 297.46 | 0.008  | 152 | → | 161 | -0.12405 |
|    |        |        |        | 153 | → | 161 | 0.12898  |
|    |        |        |        | 153 | → | 163 | -0.10089 |

|    |        |        |        |     |   |     |          |
|----|--------|--------|--------|-----|---|-----|----------|
|    |        |        |        | 158 | → | 164 | 0.26219  |
|    |        |        |        | 158 | → | 165 | 0.15455  |
|    |        |        |        | 159 | → | 166 | 0.13428  |
|    |        |        |        | 160 | → | 164 | -0.11617 |
|    |        |        |        | 160 | → | 165 | 0.1933   |
|    |        |        |        | 160 | → | 167 | 0.44131  |
|    |        |        |        | 160 | → | 168 | 0.1273   |
| 27 | 4.1907 | 295.86 | 0.0029 | 154 | → | 161 | -0.1093  |
|    |        |        |        | 158 | → | 166 | -0.10404 |
|    |        |        |        | 159 | → | 175 | 0.10391  |
|    |        |        |        | 160 | → | 165 | 0.10145  |
|    |        |        |        | 160 | → | 166 | -0.16703 |
|    |        |        |        | 160 | → | 167 | -0.21909 |
|    |        |        |        | 160 | → | 168 | 0.5262   |
|    |        |        |        | 160 | → | 169 | -0.16031 |
| 28 | 4.2436 | 292.17 | 0.0117 | 155 | → | 163 | -0.10854 |
|    |        |        |        | 158 | → | 165 | 0.304    |
|    |        |        |        | 158 | → | 166 | 0.38821  |
|    |        |        |        | 158 | → | 168 | 0.1341   |
|    |        |        |        | 159 | → | 166 | -0.25463 |
|    |        |        |        | 159 | → | 168 | -0.19829 |
|    |        |        |        | 160 | → | 168 | 0.16358  |
|    |        |        |        | 160 | → | 175 | -0.13054 |
| 29 | 4.2556 | 291.35 | 0.0151 | 155 | → | 163 | 0.29751  |
|    |        |        |        | 158 | → | 165 | 0.24698  |
|    |        |        |        | 159 | → | 165 | -0.23431 |
|    |        |        |        | 159 | → | 175 | -0.11872 |
|    |        |        |        | 160 | → | 165 | 0.15546  |
|    |        |        |        | 160 | → | 166 | 0.14225  |
|    |        |        |        | 160 | → | 167 | -0.22816 |
|    |        |        |        | 160 | → | 168 | -0.12905 |
|    |        |        |        | 160 | → | 169 | -0.21316 |
| 30 | 4.2849 | 289.35 | 0      | 155 | → | 162 | 0.50782  |
|    |        |        |        | 155 | → | 163 | -0.32133 |
|    |        |        |        | 156 | → | 162 | -0.14449 |
|    |        |        |        | 159 | → | 165 | -0.12917 |
|    |        |        |        | 160 | → | 169 | -0.17488 |
| 31 | 4.2938 | 288.75 | 0.0016 | 155 | → | 162 | -0.24519 |
|    |        |        |        | 155 | → | 163 | -0.17862 |
|    |        |        |        | 158 | → | 165 | -0.17543 |
|    |        |        |        | 158 | → | 166 | 0.27511  |
|    |        |        |        | 158 | → | 169 | -0.10227 |
|    |        |        |        | 159 | → | 165 | -0.27349 |
|    |        |        |        | 159 | → | 166 | 0.26777  |
|    |        |        |        | 159 | → | 172 | -0.13616 |
| 32 | 4.3144 | 287.37 | 0.0015 | 155 | → | 162 | 0.14996  |

|    |        |        |        |     |   |     |          |
|----|--------|--------|--------|-----|---|-----|----------|
|    |        |        |        | 155 | → | 163 | 0.233    |
|    |        |        |        | 158 | → | 168 | 0.10191  |
|    |        |        |        | 159 | → | 165 | -0.19139 |
|    |        |        |        | 159 | → | 166 | 0.12157  |
|    |        |        |        | 159 | → | 167 | -0.21329 |
|    |        |        |        | 159 | → | 168 | 0.15487  |
|    |        |        |        | 159 | → | 172 | -0.10695 |
|    |        |        |        | 160 | → | 168 | 0.15239  |
|    |        |        |        | 160 | → | 169 | 0.37641  |
| 33 | 4.3411 | 285.61 | 0.0044 | 154 | → | 162 | -0.11338 |
|    |        |        |        | 155 | → | 162 | 0.28834  |
|    |        |        |        | 155 | → | 163 | 0.38492  |
|    |        |        |        | 158 | → | 165 | -0.18975 |
|    |        |        |        | 158 | → | 166 | 0.11085  |
|    |        |        |        | 159 | → | 166 | 0.10079  |
|    |        |        |        | 159 | → | 167 | 0.25872  |
|    |        |        |        | 159 | → | 168 | -0.18416 |
| 34 | 4.3775 | 283.23 | 0.0125 | 155 | → | 163 | 0.12064  |
|    |        |        |        | 158 | → | 165 | -0.18694 |
|    |        |        |        | 158 | → | 166 | 0.24013  |
|    |        |        |        | 159 | → | 165 | 0.12659  |
|    |        |        |        | 159 | → | 166 | -0.19008 |
|    |        |        |        | 159 | → | 167 | -0.17543 |
|    |        |        |        | 159 | → | 168 | 0.41578  |
|    |        |        |        | 160 | → | 167 | 0.10275  |
|    |        |        |        | 160 | → | 169 | -0.23866 |
|    |        |        |        | 160 | → | 172 | -0.12912 |
| 35 | 4.4289 | 279.94 | 0.0209 | 154 | → | 162 | -0.12431 |
|    |        |        |        | 158 | → | 167 | 0.30484  |
|    |        |        |        | 158 | → | 168 | -0.29076 |
|    |        |        |        | 159 | → | 167 | -0.23655 |
|    |        |        |        | 159 | → | 168 | -0.14405 |
|    |        |        |        | 159 | → | 171 | -0.1159  |
|    |        |        |        | 159 | → | 172 | 0.17216  |
|    |        |        |        | 159 | → | 174 | 0.11395  |
|    |        |        |        | 160 | → | 169 | 0.12176  |
|    |        |        |        | 160 | → | 171 | 0.1063   |
|    |        |        |        | 160 | → | 175 | 0.18292  |
| 36 | 4.4353 | 279.54 | 0.0051 | 158 | → | 166 | 0.14948  |
|    |        |        |        | 158 | → | 172 | -0.12903 |
|    |        |        |        | 158 | → | 173 | 0.11312  |
|    |        |        |        | 158 | → | 175 | -0.10619 |
|    |        |        |        | 159 | → | 166 | -0.10877 |
|    |        |        |        | 159 | → | 167 | 0.36758  |
|    |        |        |        | 159 | → | 168 | 0.25503  |
|    |        |        |        | 160 | → | 165 | 0.10424  |

|    |        |        |        |     |   |     |          |
|----|--------|--------|--------|-----|---|-----|----------|
|    |        |        |        | 160 | → | 169 | 0.19647  |
|    |        |        |        | 160 | → | 172 | 0.14218  |
|    |        |        |        | 160 | → | 173 | -0.112   |
|    |        |        |        | 160 | → | 175 | 0.15938  |
| 37 | 4.4675 | 277.53 | 0.002  | 158 | → | 167 | 0.17233  |
|    |        |        |        | 158 | → | 172 | -0.12488 |
|    |        |        |        | 159 | → | 166 | -0.10341 |
|    |        |        |        | 159 | → | 167 | -0.18207 |
|    |        |        |        | 159 | → | 169 | -0.14085 |
|    |        |        |        | 159 | → | 171 | 0.22117  |
|    |        |        |        | 159 | → | 172 | -0.13132 |
|    |        |        |        | 159 | → | 173 | -0.11482 |
|    |        |        |        | 159 | → | 175 | 0.28701  |
|    |        |        |        | 159 | → | 177 | -0.10229 |
|    |        |        |        | 160 | → | 168 | -0.11671 |
|    |        |        |        | 160 | → | 171 | -0.17627 |
|    |        |        |        | 160 | → | 172 | 0.20124  |
|    |        |        |        | 160 | → | 174 | 0.15158  |
| 38 | 4.4958 | 275.78 | 0.0018 | 152 | → | 162 | -0.10516 |
|    |        |        |        | 154 | → | 162 | 0.12387  |
|    |        |        |        | 158 | → | 166 | 0.18436  |
|    |        |        |        | 158 | → | 167 | 0.10215  |
|    |        |        |        | 158 | → | 169 | 0.14964  |
|    |        |        |        | 159 | → | 168 | -0.14272 |
|    |        |        |        | 159 | → | 169 | 0.45984  |
|    |        |        |        | 159 | → | 172 | 0.10303  |
|    |        |        |        | 159 | → | 175 | 0.10672  |
| 39 | 4.533  | 273.51 | 0.0074 | 158 | → | 164 | -0.12208 |
|    |        |        |        | 158 | → | 165 | 0.20801  |
|    |        |        |        | 158 | → | 166 | -0.14696 |
|    |        |        |        | 158 | → | 167 | 0.43486  |
|    |        |        |        | 158 | → | 168 | 0.33264  |
|    |        |        |        | 158 | → | 169 | -0.13248 |
|    |        |        |        | 159 | → | 167 | 0.16246  |
|    |        |        |        | 159 | → | 168 | 0.11414  |
| 40 | 4.5554 | 272.17 | 0.0074 | 154 | → | 161 | -0.15306 |
|    |        |        |        | 154 | → | 163 | -0.10706 |
|    |        |        |        | 158 | → | 168 | -0.31695 |
|    |        |        |        | 158 | → | 169 | -0.26569 |
|    |        |        |        | 159 | → | 165 | -0.11163 |
|    |        |        |        | 159 | → | 168 | 0.14359  |
|    |        |        |        | 159 | → | 169 | 0.36773  |
|    |        |        |        | 160 | → | 169 | 0.10574  |

**Table S8.** TDDFT calculated transitions for *mer*-[Ru(Q3PzH)<sub>2</sub>(Q3Pz<sub>a</sub>)<sup>+</sup>].

| Excited State | Energy (eV) | Wavelength (nm) | f      | Transitions |   |     |          |
|---------------|-------------|-----------------|--------|-------------|---|-----|----------|
| 1             | 2.2748      | 545.03          | 0.006  | 160         | → | 161 | -0.47304 |
|               |             |                 |        | 160         | → | 162 | 0.51488  |
| 2             | 2.3697      | 523.21          | 0.159  | 160         | → | 161 | 0.51265  |
|               |             |                 |        | 160         | → | 162 | 0.46974  |
| 3             | 2.5739      | 481.69          | 0.0596 | 158         | → | 163 | 0.13777  |
|               |             |                 |        | 159         | → | 161 | -0.24679 |
|               |             |                 |        | 159         | → | 162 | 0.16661  |
| 4             | 2.6251      | 472.29          | 0.0055 | 160         | → | 163 | 0.60843  |
|               |             |                 |        | 159         | → | 161 | 0.50873  |
|               |             |                 |        | 159         | → | 162 | 0.45972  |
| 5             | 2.7364      | 453.09          | 0.0228 | 158         | → | 161 | 0.28151  |
|               |             |                 |        | 158         | → | 162 | -0.24477 |
|               |             |                 |        | 159         | → | 161 | 0.27756  |
|               |             |                 |        | 159         | → | 162 | -0.233   |
|               |             |                 |        | 159         | → | 163 | 0.43362  |
| 6             | 2.7621      | 448.88          | 0.0028 | 160         | → | 163 | 0.11066  |
|               |             |                 |        | 158         | → | 161 | -0.37515 |
|               |             |                 |        | 158         | → | 162 | 0.44251  |
|               |             |                 |        | 159         | → | 161 | 0.15254  |
|               |             |                 |        | 159         | → | 162 | -0.13629 |
| 7             | 2.7963      | 443.39          | 0.0722 | 159         | → | 163 | 0.27499  |
|               |             |                 |        | 160         | → | 163 | 0.16344  |
|               |             |                 |        | 158         | → | 161 | 0.49121  |
|               |             |                 |        | 158         | → | 162 | 0.45083  |
|               |             |                 |        | 158         | → | 163 | -0.1389  |
| 8             | 2.8518      | 434.75          | 0.0659 | 159         | → | 162 | 0.10698  |
|               |             |                 |        | 158         | → | 163 | -0.28397 |
|               |             |                 |        | 159         | → | 161 | -0.23532 |
|               |             |                 |        | 159         | → | 162 | 0.36211  |
|               |             |                 |        | 159         | → | 163 | 0.43444  |
| 9             | 3.0302      | 409.16          | 0.0239 | 160         | → | 163 | -0.1311  |
|               |             |                 |        | 157         | → | 163 | -0.10602 |
|               |             |                 |        | 158         | → | 163 | 0.57797  |
|               |             |                 |        | 159         | → | 161 | -0.11682 |
|               |             |                 |        | 159         | → | 162 | 0.1626   |
| 10            | 3.2474      | 381.79          | 0.0177 | 159         | → | 163 | 0.13198  |
|               |             |                 |        | 160         | → | 163 | -0.20321 |
|               |             |                 |        | 157         | → | 161 | 0.59474  |
| 11            | 3.3979      | 364.89          | 0.0162 | 157         | → | 162 | 0.32942  |
|               |             |                 |        | 157         | → | 161 | -0.285   |
| 12            | 3.4304      | 361.43          | 0.0122 | 157         | → | 162 | 0.56611  |
|               |             |                 |        | 157         | → | 163 | -0.20397 |
|               |             |                 |        | 160         | → | 165 | -0.11212 |
|               |             |                 |        | 157         | → | 161 | -0.10765 |
|               |             |                 |        | 157         | → | 162 | 0.2048   |

|    |        |        |        |     |   |     |          |
|----|--------|--------|--------|-----|---|-----|----------|
|    |        |        |        | 157 | → | 163 | 0.12451  |
|    |        |        |        | 160 | → | 164 | -0.21238 |
|    |        |        |        | 160 | → | 165 | 0.4631   |
|    |        |        |        | 160 | → | 166 | -0.18561 |
|    |        |        |        | 160 | → | 167 | 0.19861  |
|    |        |        |        | 160 | → | 169 | 0.1458   |
|    |        |        |        | 160 | → | 173 | 0.15081  |
| 13 | 3.4836 | 355.91 | 0.0351 | 157 | → | 161 | -0.15648 |
|    |        |        |        | 157 | → | 163 | 0.58993  |
|    |        |        |        | 160 | → | 164 | 0.26709  |
|    |        |        |        | 160 | → | 165 | -0.14101 |
| 14 | 3.5384 | 350.39 | 0.0108 | 157 | → | 163 | -0.24832 |
|    |        |        |        | 160 | → | 164 | 0.55484  |
|    |        |        |        | 160 | → | 165 | 0.10224  |
|    |        |        |        | 160 | → | 166 | -0.14573 |
|    |        |        |        | 160 | → | 167 | 0.12267  |
|    |        |        |        | 160 | → | 169 | 0.1032   |
|    |        |        |        | 160 | → | 173 | 0.11868  |
| 15 | 3.6187 | 342.62 | 0.0021 | 160 | → | 164 | 0.13165  |
|    |        |        |        | 160 | → | 165 | 0.35371  |
|    |        |        |        | 160 | → | 166 | 0.5398   |
|    |        |        |        | 160 | → | 169 | -0.14963 |
| 16 | 3.709  | 334.28 | 0.0035 | 159 | → | 164 | 0.21081  |
|    |        |        |        | 159 | → | 165 | 0.24819  |
|    |        |        |        | 159 | → | 166 | -0.11324 |
|    |        |        |        | 159 | → | 167 | 0.20202  |
|    |        |        |        | 159 | → | 169 | 0.19208  |
|    |        |        |        | 159 | → | 173 | 0.2953   |
|    |        |        |        | 159 | → | 175 | 0.11028  |
|    |        |        |        | 160 | → | 164 | 0.12444  |
|    |        |        |        | 160 | → | 165 | 0.17458  |
|    |        |        |        | 160 | → | 166 | -0.14618 |
|    |        |        |        | 160 | → | 167 | -0.14984 |
|    |        |        |        | 160 | → | 177 | 0.12117  |
| 17 | 3.7739 | 328.53 | 0.0016 | 158 | → | 165 | -0.11951 |
|    |        |        |        | 158 | → | 169 | -0.103   |
|    |        |        |        | 158 | → | 173 | -0.11539 |
|    |        |        |        | 159 | → | 164 | 0.22555  |
|    |        |        |        | 159 | → | 173 | 0.10346  |
|    |        |        |        | 160 | → | 164 | -0.10591 |
|    |        |        |        | 160 | → | 165 | -0.25361 |
|    |        |        |        | 160 | → | 166 | 0.21613  |
|    |        |        |        | 160 | → | 167 | 0.36517  |
|    |        |        |        | 160 | → | 169 | 0.13868  |
|    |        |        |        | 160 | → | 173 | 0.14699  |
| 18 | 3.798  | 326.45 | 0.001  | 158 | → | 165 | 0.12413  |

|    |        |        |        |     |   |     |          |
|----|--------|--------|--------|-----|---|-----|----------|
|    |        |        |        | 159 | → | 164 | 0.5377   |
|    |        |        |        | 159 | → | 165 | -0.15812 |
|    |        |        |        | 159 | → | 166 | 0.16311  |
|    |        |        |        | 159 | → | 168 | 0.14049  |
|    |        |        |        | 160 | → | 166 | -0.13251 |
| 19 | 3.8377 | 323.06 | 0.0206 | 155 | → | 161 | -0.10409 |
|    |        |        |        | 158 | → | 165 | -0.11302 |
|    |        |        |        | 160 | → | 164 | -0.11237 |
|    |        |        |        | 160 | → | 167 | -0.32574 |
|    |        |        |        | 160 | → | 168 | 0.50248  |
| 20 | 3.8842 | 319.2  | 0.0817 | 155 | → | 161 | -0.18446 |
|    |        |        |        | 155 | → | 162 | 0.25958  |
|    |        |        |        | 156 | → | 162 | 0.19844  |
|    |        |        |        | 158 | → | 164 | 0.1083   |
|    |        |        |        | 159 | → | 164 | -0.18106 |
|    |        |        |        | 160 | → | 166 | -0.15061 |
|    |        |        |        | 160 | → | 167 | 0.29865  |
|    |        |        |        | 160 | → | 168 | 0.27091  |
|    |        |        |        | 160 | → | 169 | -0.19553 |
|    |        |        |        | 160 | → | 173 | -0.13049 |
| 21 | 3.894  | 318.4  | 0.031  | 155 | → | 161 | -0.21767 |
|    |        |        |        | 155 | → | 162 | 0.43464  |
|    |        |        |        | 156 | → | 161 | -0.30058 |
|    |        |        |        | 156 | → | 162 | 0.1207   |
|    |        |        |        | 158 | → | 164 | -0.10491 |
|    |        |        |        | 160 | → | 167 | -0.15197 |
|    |        |        |        | 160 | → | 168 | -0.26242 |
| 22 | 3.9164 | 316.58 | 0.089  | 155 | → | 161 | -0.18539 |
|    |        |        |        | 156 | → | 161 | 0.43782  |
|    |        |        |        | 156 | → | 162 | 0.44317  |
|    |        |        |        | 158 | → | 164 | -0.12408 |
| 23 | 3.972  | 312.15 | 0.0184 | 156 | → | 162 | 0.14142  |
|    |        |        |        | 158 | → | 164 | 0.24427  |
|    |        |        |        | 158 | → | 167 | 0.10296  |
|    |        |        |        | 158 | → | 173 | 0.11959  |
|    |        |        |        | 159 | → | 165 | 0.43801  |
|    |        |        |        | 159 | → | 166 | 0.21125  |
|    |        |        |        | 159 | → | 167 | 0.1078   |
|    |        |        |        | 160 | → | 169 | 0.1312   |
|    |        |        |        | 160 | → | 177 | -0.10818 |
| 24 | 3.9923 | 310.56 | 0.0117 | 155 | → | 161 | 0.51787  |
|    |        |        |        | 155 | → | 162 | 0.39698  |
|    |        |        |        | 156 | → | 161 | 0.21424  |
| 25 | 4.0153 | 308.78 | 0.0155 | 158 | → | 164 | -0.26054 |
|    |        |        |        | 158 | → | 165 | -0.25612 |
|    |        |        |        | 158 | → | 167 | -0.19783 |



|    |        |        |        |     |   |     |          |
|----|--------|--------|--------|-----|---|-----|----------|
|    |        |        |        | 158 | → | 169 | -0.1007  |
|    |        |        |        | 158 | → | 173 | -0.10647 |
|    |        |        |        | 159 | → | 165 | 0.24786  |
|    |        |        |        | 159 | → | 166 | 0.32863  |
|    |        |        |        | 160 | → | 169 | -0.22603 |
| 26 | 4.0249 | 308.04 | 0.0068 | 155 | → | 161 | 0.27248  |
|    |        |        |        | 155 | → | 162 | -0.182   |
|    |        |        |        | 156 | → | 161 | -0.3091  |
|    |        |        |        | 156 | → | 162 | 0.40241  |
|    |        |        |        | 158 | → | 164 | 0.14088  |
|    |        |        |        | 158 | → | 165 | -0.23099 |
| 27 | 4.0432 | 306.65 | 0.0202 | 155 | → | 161 | -0.10048 |
|    |        |        |        | 155 | → | 162 | 0.12843  |
|    |        |        |        | 156 | → | 161 | 0.20345  |
|    |        |        |        | 156 | → | 162 | -0.17009 |
|    |        |        |        | 158 | → | 164 | 0.37564  |
|    |        |        |        | 158 | → | 165 | -0.32953 |
|    |        |        |        | 159 | → | 165 | -0.17819 |
|    |        |        |        | 160 | → | 168 | -0.16176 |
| 28 | 4.0789 | 303.96 | 0.0057 | 159 | → | 164 | -0.17169 |
|    |        |        |        | 159 | → | 165 | -0.24725 |
|    |        |        |        | 159 | → | 166 | 0.41785  |
|    |        |        |        | 159 | → | 167 | 0.29604  |
|    |        |        |        | 159 | → | 168 | 0.21849  |
|    |        |        |        | 159 | → | 173 | 0.11554  |
|    |        |        |        | 160 | → | 169 | 0.11705  |
| 29 | 4.0901 | 303.13 | 0.0032 | 158 | → | 164 | 0.14494  |
|    |        |        |        | 158 | → | 166 | -0.15645 |
|    |        |        |        | 158 | → | 176 | -0.16025 |
|    |        |        |        | 158 | → | 177 | 0.25571  |
|    |        |        |        | 159 | → | 166 | 0.12462  |
|    |        |        |        | 160 | → | 171 | 0.11242  |
|    |        |        |        | 160 | → | 172 | 0.13414  |
|    |        |        |        | 160 | → | 174 | -0.14097 |
|    |        |        |        | 160 | → | 176 | -0.18463 |
|    |        |        |        | 160 | → | 177 | 0.36003  |
| 30 | 4.1422 | 299.32 | 0.0091 | 156 | → | 163 | 0.10487  |
|    |        |        |        | 158 | → | 164 | 0.22056  |
|    |        |        |        | 158 | → | 165 | 0.24521  |
|    |        |        |        | 158 | → | 166 | 0.43834  |
|    |        |        |        | 158 | → | 169 | -0.10456 |
|    |        |        |        | 158 | → | 173 | -0.1162  |
|    |        |        |        | 159 | → | 166 | 0.10698  |
|    |        |        |        | 159 | → | 167 | -0.11979 |
|    |        |        |        | 159 | → | 168 | -0.20225 |
| 31 | 4.2031 | 294.98 | 0.0057 | 154 | → | 161 | 0.18485  |

|    |        |        |        |     |   |     |          |
|----|--------|--------|--------|-----|---|-----|----------|
|    |        |        |        | 154 | → | 162 | 0.10291  |
|    |        |        |        | 155 | → | 163 | 0.10166  |
|    |        |        |        | 156 | → | 163 | 0.59023  |
|    |        |        |        | 159 | → | 166 | -0.10673 |
|    |        |        |        | 159 | → | 167 | 0.10183  |
|    |        |        |        | 159 | → | 168 | 0.1255   |
| 32 | 4.2148 | 294.17 | 0.0112 | 154 | → | 161 | -0.14101 |
|    |        |        |        | 155 | → | 163 | 0.20703  |
|    |        |        |        | 156 | → | 163 | -0.13366 |
|    |        |        |        | 158 | → | 166 | 0.3156   |
|    |        |        |        | 159 | → | 166 | -0.25259 |
|    |        |        |        | 159 | → | 167 | 0.25936  |
|    |        |        |        | 159 | → | 168 | 0.18428  |
|    |        |        |        | 159 | → | 169 | -0.1563  |
|    |        |        |        | 159 | → | 173 | -0.16405 |
| 33 | 4.2281 | 293.24 | 0.0052 | 155 | → | 163 | 0.20232  |
|    |        |        |        | 156 | → | 163 | -0.14807 |
|    |        |        |        | 158 | → | 164 | 0.23015  |
|    |        |        |        | 158 | → | 165 | 0.20086  |
|    |        |        |        | 158 | → | 166 | -0.16435 |
|    |        |        |        | 158 | → | 167 | -0.14235 |
|    |        |        |        | 158 | → | 168 | -0.19706 |
|    |        |        |        | 158 | → | 169 | -0.11199 |
|    |        |        |        | 158 | → | 173 | -0.14759 |
|    |        |        |        | 159 | → | 167 | -0.12175 |
|    |        |        |        | 159 | → | 168 | 0.35977  |
|    |        |        |        | 160 | → | 169 | -0.14361 |
| 34 | 4.2448 | 292.09 | 0.0107 | 154 | → | 161 | 0.28675  |
|    |        |        |        | 154 | → | 162 | 0.19235  |
|    |        |        |        | 155 | → | 163 | -0.30972 |
|    |        |        |        | 156 | → | 163 | -0.16347 |
|    |        |        |        | 158 | → | 165 | 0.11188  |
|    |        |        |        | 158 | → | 167 | -0.1096  |
|    |        |        |        | 159 | → | 167 | 0.32019  |
|    |        |        |        | 159 | → | 168 | -0.10617 |
|    |        |        |        | 160 | → | 169 | -0.20426 |
| 35 | 4.2619 | 290.91 | 0.0139 | 155 | → | 163 | 0.45214  |
|    |        |        |        | 158 | → | 165 | 0.11858  |
|    |        |        |        | 158 | → | 166 | -0.1767  |
|    |        |        |        | 159 | → | 167 | 0.20087  |
|    |        |        |        | 159 | → | 168 | -0.359   |
| 36 | 4.2705 | 290.32 | 0.0031 | 154 | → | 161 | 0.395    |
|    |        |        |        | 154 | → | 162 | 0.25719  |
|    |        |        |        | 155 | → | 163 | 0.26678  |
|    |        |        |        | 156 | → | 163 | -0.16768 |
|    |        |        |        | 158 | → | 165 | -0.17564 |

|    |        |        |        |     |   |     |          |
|----|--------|--------|--------|-----|---|-----|----------|
|    |        |        |        | 158 | → | 167 | 0.30154  |
|    |        |        |        | 159 | → | 167 | -0.11205 |
| 37 | 4.2998 | 288.35 | 0.0214 | 154 | → | 161 | -0.20413 |
|    |        |        |        | 154 | → | 162 | -0.12708 |
|    |        |        |        | 155 | → | 163 | -0.12095 |
|    |        |        |        | 157 | → | 166 | -0.10348 |
|    |        |        |        | 158 | → | 165 | -0.11139 |
|    |        |        |        | 158 | → | 166 | -0.10935 |
|    |        |        |        | 158 | → | 167 | 0.45305  |
|    |        |        |        | 158 | → | 168 | -0.1079  |
|    |        |        |        | 160 | → | 169 | -0.23863 |
|    |        |        |        | 160 | → | 173 | 0.13958  |
| 38 | 4.3395 | 285.71 | 0.0044 | 154 | → | 162 | 0.1345   |
|    |        |        |        | 158 | → | 168 | 0.54405  |
|    |        |        |        | 159 | → | 167 | -0.15117 |
|    |        |        |        | 159 | → | 168 | 0.11272  |
|    |        |        |        | 160 | → | 169 | -0.20638 |
|    |        |        |        | 160 | → | 173 | 0.14541  |
| 39 | 4.3878 | 282.56 | 0.0001 | 152 | → | 161 | -0.13567 |
|    |        |        |        | 152 | → | 163 | -0.11559 |
|    |        |        |        | 154 | → | 161 | -0.21581 |
|    |        |        |        | 154 | → | 162 | 0.31773  |
|    |        |        |        | 154 | → | 163 | -0.17781 |
|    |        |        |        | 157 | → | 164 | -0.1022  |
|    |        |        |        | 157 | → | 166 | 0.19295  |
|    |        |        |        | 158 | → | 168 | -0.22686 |
|    |        |        |        | 158 | → | 169 | 0.17262  |
|    |        |        |        | 159 | → | 169 | 0.16109  |
|    |        |        |        | 160 | → | 169 | -0.10683 |
|    |        |        |        | 160 | → | 173 | 0.11673  |
| 40 | 4.4199 | 280.51 | 0.0024 | 152 | → | 161 | 0.15126  |
|    |        |        |        | 152 | → | 163 | 0.12548  |
|    |        |        |        | 154 | → | 161 | -0.27996 |
|    |        |        |        | 154 | → | 162 | 0.42748  |
|    |        |        |        | 157 | → | 164 | 0.13008  |
|    |        |        |        | 157 | → | 165 | -0.14223 |
|    |        |        |        | 157 | → | 166 | -0.25188 |
|    |        |        |        | 158 | → | 169 | -0.10756 |
|    |        |        |        | 160 | → | 173 | -0.13683 |

**Table S9.** TDDFT calculated transitions for *mer*-[Ru(Q3PzH)<sub>2</sub>(Q3Pz<sub>b</sub>)<sup>+</sup>].

| Excited State | Energy (eV) | Wavelength (nm) | f      | Transitions |   |     |          |
|---------------|-------------|-----------------|--------|-------------|---|-----|----------|
| 1             | 2.3575      | 525.92          | 0.0222 | 160         | → | 161 | 0.58029  |
|               |             |                 |        | 160         | → | 162 | 0.38308  |
| 2             | 2.423       | 511.61          | 0.101  | 159         | → | 161 | 0.13462  |
|               |             |                 |        | 160         | → | 161 | -0.36945 |

|    |       |        |        |     |   |     |          |
|----|-------|--------|--------|-----|---|-----|----------|
| 3  | 2.596 | 477.58 | 0.0493 | 160 | → | 162 | 0.57483  |
|    |       |        |        | 159 | → | 161 | 0.52499  |
|    |       |        |        | 159 | → | 162 | 0.14472  |
| 4  | 2.641 | 469.44 | 0.0069 | 160 | → | 163 | 0.41073  |
|    |       |        |        | 158 | → | 161 | 0.21044  |
|    |       |        |        | 159 | → | 161 | 0.10604  |
|    |       |        |        | 159 | → | 162 | 0.53668  |
|    |       |        |        | 159 | → | 163 | 0.22473  |
| 5  | 2.647 | 468.24 | 0.0302 | 160 | → | 163 | -0.27168 |
|    |       |        |        | 158 | → | 162 | 0.1514   |
|    |       |        |        | 159 | → | 161 | 0.40195  |
|    |       |        |        | 159 | → | 162 | -0.33789 |
|    |       |        |        | 160 | → | 161 | 0.10894  |
| 6  | 2.769 | 447.75 | 0.0533 | 160 | → | 163 | -0.40044 |
|    |       |        |        | 157 | → | 161 | 0.17373  |
|    |       |        |        | 157 | → | 162 | -0.1019  |
|    |       |        |        | 158 | → | 161 | 0.55628  |
|    |       |        |        | 158 | → | 162 | -0.25706 |
|    |       |        |        | 159 | → | 162 | -0.13406 |
|    |       |        |        | 159 | → | 163 | -0.19035 |
| 7  | 2.79  | 444.3  | 0.0101 | 158 | → | 162 | -0.1993  |
|    |       |        |        | 158 | → | 163 | -0.25582 |
|    |       |        |        | 159 | → | 162 | -0.14409 |
|    |       |        |        | 159 | → | 163 | 0.57984  |
|    |       |        |        | 160 | → | 163 | 0.11066  |
| 8  | 2.889 | 429.06 | 0.0786 | 157 | → | 162 | 0.13519  |
|    |       |        |        | 157 | → | 163 | -0.11762 |
|    |       |        |        | 158 | → | 161 | 0.2118   |
|    |       |        |        | 158 | → | 162 | 0.54224  |
|    |       |        |        | 158 | → | 163 | -0.27724 |
|    |       |        |        | 159 | → | 161 | -0.12053 |
| 9  | 3.022 | 410.22 | 0.0536 | 157 | → | 161 | 0.22941  |
|    |       |        |        | 157 | → | 162 | -0.12454 |
|    |       |        |        | 157 | → | 163 | 0.19274  |
|    |       |        |        | 158 | → | 161 | 0.13525  |
|    |       |        |        | 158 | → | 162 | 0.15528  |
|    |       |        |        | 158 | → | 163 | 0.48362  |
|    |       |        |        | 159 | → | 163 | 0.18181  |
|    |       |        |        | 160 | → | 163 | 0.21852  |
| 10 | 3.08  | 402.48 | 0.0046 | 157 | → | 161 | 0.57163  |
|    |       |        |        | 157 | → | 162 | -0.21935 |
|    |       |        |        | 158 | → | 161 | -0.25349 |
|    |       |        |        | 158 | → | 163 | -0.16517 |
| 11 | 3.155 | 392.93 | 0.011  | 159 | → | 163 | -0.10328 |
|    |       |        |        | 157 | → | 161 | 0.26215  |
|    |       |        |        | 157 | → | 162 | 0.601    |

|    |       |        |        |     |   |     |          |
|----|-------|--------|--------|-----|---|-----|----------|
|    |       |        |        | 158 | → | 162 | -0.17177 |
| 12 | 3.285 | 377.41 | 0.0707 | 157 | → | 162 | 0.13685  |
|    |       |        |        | 157 | → | 163 | 0.64251  |
|    |       |        |        | 158 | → | 163 | -0.21074 |
| 13 | 3.429 | 361.51 | 0.0116 | 160 | → | 164 | 0.45728  |
|    |       |        |        | 160 | → | 165 | -0.18542 |
|    |       |        |        | 160 | → | 166 | 0.2852   |
|    |       |        |        | 160 | → | 167 | 0.15382  |
|    |       |        |        | 160 | → | 168 | -0.1801  |
|    |       |        |        | 160 | → | 169 | -0.11781 |
|    |       |        |        | 160 | → | 173 | -0.20334 |
| 14 | 3.593 | 344.99 | 0.001  | 159 | → | 164 | -0.20451 |
|    |       |        |        | 159 | → | 166 | -0.1564  |
|    |       |        |        | 159 | → | 167 | -0.10382 |
|    |       |        |        | 159 | → | 173 | 0.13874  |
|    |       |        |        | 160 | → | 164 | 0.32558  |
|    |       |        |        | 160 | → | 165 | 0.46135  |
|    |       |        |        | 160 | → | 168 | 0.15609  |
| 15 | 3.614 | 343.02 | 0.001  | 158 | → | 173 | -0.10254 |
|    |       |        |        | 160 | → | 164 | -0.33909 |
|    |       |        |        | 160 | → | 165 | 0.3464   |
|    |       |        |        | 160 | → | 166 | 0.3857   |
|    |       |        |        | 160 | → | 169 | -0.14233 |
|    |       |        |        | 160 | → | 173 | -0.14937 |
| 16 | 3.701 | 334.95 | 0.0028 | 157 | → | 173 | 0.1416   |
|    |       |        |        | 158 | → | 164 | -0.27037 |
|    |       |        |        | 158 | → | 166 | -0.21926 |
|    |       |        |        | 158 | → | 167 | -0.12987 |
|    |       |        |        | 158 | → | 168 | 0.12487  |
|    |       |        |        | 158 | → | 169 | 0.1411   |
|    |       |        |        | 158 | → | 173 | 0.30213  |
|    |       |        |        | 160 | → | 166 | 0.24329  |
| 17 | 3.775 | 328.4  | 0.0131 | 158 | → | 165 | -0.10149 |
|    |       |        |        | 159 | → | 164 | 0.36526  |
|    |       |        |        | 159 | → | 166 | 0.1637   |
|    |       |        |        | 159 | → | 173 | -0.20222 |
|    |       |        |        | 160 | → | 164 | 0.15439  |
|    |       |        |        | 160 | → | 165 | 0.26949  |
|    |       |        |        | 160 | → | 166 | -0.28079 |
| 18 | 3.837 | 323.08 | 0.0032 | 159 | → | 164 | 0.31477  |
|    |       |        |        | 159 | → | 165 | 0.26196  |
|    |       |        |        | 159 | → | 177 | -0.11268 |
|    |       |        |        | 160 | → | 166 | 0.25179  |
|    |       |        |        | 160 | → | 167 | -0.30085 |
|    |       |        |        | 160 | → | 168 | 0.21902  |
| 19 | 3.85  | 321.99 | 0.0315 | 158 | → | 164 | -0.12352 |

|    |       |        |        |     |   |     |          |
|----|-------|--------|--------|-----|---|-----|----------|
|    |       |        |        | 159 | → | 164 | 0.12663  |
|    |       |        |        | 159 | → | 165 | 0.36807  |
|    |       |        |        | 159 | → | 168 | 0.15599  |
|    |       |        |        | 159 | → | 173 | 0.17942  |
|    |       |        |        | 160 | → | 166 | -0.15635 |
|    |       |        |        | 160 | → | 167 | 0.12864  |
|    |       |        |        | 160 | → | 168 | -0.26719 |
|    |       |        |        | 160 | → | 173 | -0.1799  |
|    |       |        |        | 160 | → | 176 | 0.12938  |
|    |       |        |        | 160 | → | 177 | -0.12635 |
| 20 | 3.866 | 320.69 | 0.0078 | 159 | → | 164 | 0.20184  |
|    |       |        |        | 159 | → | 166 | -0.15599 |
|    |       |        |        | 159 | → | 177 | -0.11446 |
|    |       |        |        | 160 | → | 167 | 0.52995  |
|    |       |        |        | 160 | → | 168 | 0.11529  |
|    |       |        |        | 160 | → | 173 | 0.13158  |
| 21 | 3.902 | 317.71 | 0.0703 | 155 | → | 161 | -0.10911 |
|    |       |        |        | 156 | → | 161 | 0.5494   |
|    |       |        |        | 156 | → | 162 | -0.30877 |
|    |       |        |        | 159 | → | 164 | 0.15514  |
| 22 | 3.915 | 316.68 | 0.0206 | 156 | → | 161 | 0.13879  |
|    |       |        |        | 159 | → | 164 | -0.29086 |
|    |       |        |        | 159 | → | 165 | 0.44212  |
|    |       |        |        | 159 | → | 166 | 0.23089  |
|    |       |        |        | 159 | → | 173 | -0.16521 |
|    |       |        |        | 160 | → | 176 | -0.10154 |
|    |       |        |        | 160 | → | 177 | 0.13292  |
| 23 | 3.944 | 314.3  | 0.0066 | 156 | → | 161 | 0.12956  |
|    |       |        |        | 159 | → | 176 | -0.10273 |
|    |       |        |        | 159 | → | 177 | 0.13254  |
|    |       |        |        | 160 | → | 165 | -0.14164 |
|    |       |        |        | 160 | → | 167 | 0.11486  |
|    |       |        |        | 160 | → | 168 | 0.48342  |
|    |       |        |        | 160 | → | 169 | -0.11692 |
|    |       |        |        | 160 | → | 173 | -0.21231 |
|    |       |        |        | 160 | → | 176 | 0.11777  |
| 24 | 3.966 | 312.58 | 0.0223 | 157 | → | 164 | 0.15842  |
|    |       |        |        | 157 | → | 165 | 0.10255  |
|    |       |        |        | 158 | → | 164 | 0.51576  |
|    |       |        |        | 158 | → | 165 | 0.19411  |
|    |       |        |        | 158 | → | 173 | 0.15671  |
|    |       |        |        | 159 | → | 164 | 0.13447  |
|    |       |        |        | 159 | → | 165 | 0.10462  |
| 25 | 4.004 | 309.64 | 0.0774 | 155 | → | 161 | 0.23474  |
|    |       |        |        | 155 | → | 162 | 0.17021  |
|    |       |        |        | 156 | → | 161 | 0.31491  |

|     |       |        |          |     |       |        |          |     |   |     |          |
|-----|-------|--------|----------|-----|-------|--------|----------|-----|---|-----|----------|
| 26  | 4.023 | 308.17 | 0.0027   | 156 | →     | 162    | 0.52808  |     |   |     |          |
|     |       |        |          | 157 | →     | 165    | 0.182    |     |   |     |          |
|     |       |        |          | 158 | →     | 164    | -0.19867 |     |   |     |          |
|     |       |        |          | 158 | →     | 165    | 0.5609   |     |   |     |          |
|     |       |        |          | 158 | →     | 166    | 0.14221  |     |   |     |          |
|     |       |        |          | 158 | →     | 168    | 0.13049  |     |   |     |          |
| 27  | 4.066 | 304.9  | 0.0254   | 158 | →     | 173    | -0.10708 |     |   |     |          |
|     |       |        |          | 154 | →     | 161    | -0.19114 |     |   |     |          |
|     |       |        |          | 155 | →     | 161    | 0.45264  |     |   |     |          |
|     |       |        |          | 155 | →     | 162    | 0.11048  |     |   |     |          |
|     |       |        |          | 156 | →     | 162    | -0.18206 |     |   |     |          |
|     |       |        |          | 158 | →     | 166    | 0.12321  |     |   |     |          |
|     |       |        |          | 159 | →     | 166    | 0.29107  |     |   |     |          |
|     |       |        |          | 160 | →     | 167    | 0.12447  |     |   |     |          |
| 28  | 4.093 | 302.89 | 0.0044   | 160 | →     | 169    | 0.11045  |     |   |     |          |
|     |       |        |          | 154 | →     | 162    | 0.12129  |     |   |     |          |
|     |       |        |          | 155 | →     | 161    | -0.2362  |     |   |     |          |
|     |       |        |          | 155 | →     | 162    | -0.35588 |     |   |     |          |
|     |       |        |          | 156 | →     | 162    | 0.17462  |     |   |     |          |
|     |       |        |          | 159 | →     | 166    | 0.35691  |     |   |     |          |
|     |       |        |          | 159 | →     | 167    | -0.15301 |     |   |     |          |
|     |       |        |          | 159 | →     | 168    | 0.12828  |     |   |     |          |
|     |       |        |          | 160 | →     | 169    | 0.10908  |     |   |     |          |
|     |       |        |          | 160 | →     | 177    | -0.11159 |     |   |     |          |
| 29  | 4.124 | 300.64 | 0.0214   | 154 | →     | 161    | 0.29087  |     |   |     |          |
|     |       |        |          | 154 | →     | 162    | -0.22205 |     |   |     |          |
|     |       |        |          | 155 | →     | 161    | -0.21064 |     |   |     |          |
|     |       |        |          | 155 | →     | 162    | 0.42187  |     |   |     |          |
|     |       |        |          | 156 | →     | 163    | 0.1677   |     |   |     |          |
|     |       |        |          | 159 | →     | 166    | 0.18187  |     |   |     |          |
|     |       |        |          | 159 | →     | 167    | -0.11997 |     |   |     |          |
|     |       |        |          | 155 | →     | 161    | -0.12033 |     |   |     |          |
| 30  | 4.147 | 298.96 | 0.004    | 155 | →     | 162    | 0.14893  |     |   |     |          |
|     |       |        |          | 156 | →     | 163    | -0.2702  |     |   |     |          |
|     |       |        |          | 158 | →     | 166    | -0.22872 |     |   |     |          |
|     |       |        |          | 158 | →     | 173    | -0.1493  |     |   |     |          |
|     |       |        |          | 159 | →     | 165    | -0.16457 |     |   |     |          |
|     |       |        |          | 159 | →     | 166    | 0.14246  |     |   |     |          |
|     |       |        |          | 159 | →     | 167    | 0.298    |     |   |     |          |
|     |       |        |          | 159 | →     | 168    | 0.23669  |     |   |     |          |
|     |       |        |          | 31  | 4.148 | 298.88 | 0.0215   | 154 | → | 161 | 0.1302   |
|     |       |        |          |     |       |        |          | 154 | → | 162 | -0.14595 |
| 154 | →     | 163    | 0.10583  |     |       |        |          |     |   |     |          |
| 155 | →     | 162    | -0.20053 |     |       |        |          |     |   |     |          |
| 156 | →     | 163    | 0.41141  |     |       |        |          |     |   |     |          |
| 158 | →     | 166    | -0.2063  |     |       |        |          |     |   |     |          |

|    |       |        |        |     |   |     |          |
|----|-------|--------|--------|-----|---|-----|----------|
|    |       |        |        | 158 | → | 167 | -0.10961 |
|    |       |        |        | 159 | → | 167 | 0.28897  |
|    |       |        |        | 160 | → | 169 | 0.14395  |
| 32 | 4.183 | 296.38 | 0.0098 | 154 | → | 161 | -0.22322 |
|    |       |        |        | 154 | → | 162 | 0.10924  |
|    |       |        |        | 154 | → | 163 | 0.11749  |
|    |       |        |        | 155 | → | 161 | -0.17104 |
|    |       |        |        | 155 | → | 162 | 0.13036  |
|    |       |        |        | 158 | → | 166 | 0.14376  |
|    |       |        |        | 159 | → | 167 | 0.27148  |
|    |       |        |        | 159 | → | 168 | -0.21674 |
|    |       |        |        | 159 | → | 173 | -0.10042 |
|    |       |        |        | 160 | → | 169 | 0.30645  |
|    |       |        |        | 160 | → | 177 | -0.12441 |
| 33 | 4.199 | 295.27 | 0.0111 | 158 | → | 166 | 0.42151  |
|    |       |        |        | 158 | → | 173 | 0.16322  |
|    |       |        |        | 159 | → | 165 | -0.11562 |
|    |       |        |        | 159 | → | 167 | 0.31569  |
|    |       |        |        | 159 | → | 168 | 0.22476  |
|    |       |        |        | 160 | → | 169 | -0.13123 |
| 34 | 4.21  | 294.49 | 0.0055 | 154 | → | 161 | 0.41009  |
|    |       |        |        | 154 | → | 162 | -0.14385 |
|    |       |        |        | 155 | → | 161 | 0.19657  |
|    |       |        |        | 155 | → | 162 | -0.16657 |
|    |       |        |        | 156 | → | 163 | -0.35828 |
|    |       |        |        | 160 | → | 169 | 0.18504  |
| 35 | 4.237 | 292.59 | 0.0285 | 157 | → | 164 | 0.33096  |
|    |       |        |        | 157 | → | 165 | -0.16795 |
|    |       |        |        | 157 | → | 166 | -0.20836 |
|    |       |        |        | 158 | → | 165 | 0.12157  |
|    |       |        |        | 158 | → | 167 | -0.30525 |
|    |       |        |        | 158 | → | 168 | -0.10375 |
|    |       |        |        | 159 | → | 168 | -0.28702 |
|    |       |        |        | 160 | → | 169 | -0.13644 |
| 36 | 4.246 | 291.94 | 0.0108 | 153 | → | 161 | -0.16141 |
|    |       |        |        | 157 | → | 164 | 0.28049  |
|    |       |        |        | 157 | → | 165 | -0.13358 |
|    |       |        |        | 158 | → | 167 | -0.14883 |
|    |       |        |        | 159 | → | 166 | -0.17604 |
|    |       |        |        | 159 | → | 168 | 0.30147  |
|    |       |        |        | 159 | → | 169 | -0.12279 |
|    |       |        |        | 159 | → | 173 | -0.1138  |
|    |       |        |        | 159 | → | 177 | 0.11233  |
|    |       |        |        | 160 | → | 169 | 0.24552  |
| 37 | 4.278 | 289.81 | 0.0168 | 154 | → | 161 | 0.20656  |
|    |       |        |        | 154 | → | 162 | 0.30489  |



|    |       |        |        |     |   |     |          |
|----|-------|--------|--------|-----|---|-----|----------|
|    |       |        |        | 154 | → | 163 | 0.10215  |
|    |       |        |        | 155 | → | 163 | -0.15934 |
|    |       |        |        | 157 | → | 164 | 0.25492  |
|    |       |        |        | 157 | → | 165 | -0.15796 |
|    |       |        |        | 157 | → | 167 | 0.11193  |
|    |       |        |        | 158 | → | 164 | -0.10698 |
|    |       |        |        | 158 | → | 166 | -0.19152 |
|    |       |        |        | 158 | → | 167 | 0.30768  |
|    |       |        |        | 159 | → | 167 | 0.13082  |
| 38 | 4.292 | 288.87 | 0.0043 | 154 | → | 161 | 0.19809  |
|    |       |        |        | 154 | → | 162 | 0.43015  |
|    |       |        |        | 156 | → | 162 | -0.10199 |
|    |       |        |        | 157 | → | 164 | -0.14756 |
|    |       |        |        | 157 | → | 167 | -0.11361 |
|    |       |        |        | 158 | → | 164 | 0.14958  |
|    |       |        |        | 158 | → | 166 | 0.11824  |
|    |       |        |        | 158 | → | 167 | -0.32201 |
|    |       |        |        | 158 | → | 168 | 0.16638  |
| 39 | 4.307 | 287.83 | 0.0012 | 153 | → | 161 | -0.21483 |
|    |       |        |        | 153 | → | 162 | 0.13286  |
|    |       |        |        | 154 | → | 162 | -0.2371  |
|    |       |        |        | 154 | → | 163 | 0.13479  |
|    |       |        |        | 155 | → | 163 | -0.23414 |
|    |       |        |        | 157 | → | 166 | 0.20648  |
|    |       |        |        | 158 | → | 168 | 0.33101  |
|    |       |        |        | 159 | → | 168 | -0.15825 |
|    |       |        |        | 160 | → | 169 | -0.13343 |
| 40 | 4.34  | 285.68 | 0.0093 | 153 | → | 161 | -0.22126 |
|    |       |        |        | 153 | → | 162 | 0.14855  |
|    |       |        |        | 154 | → | 163 | -0.21488 |
|    |       |        |        | 155 | → | 163 | 0.48819  |
|    |       |        |        | 156 | → | 163 | 0.17753  |
|    |       |        |        | 157 | → | 166 | 0.11212  |
|    |       |        |        | 158 | → | 167 | 0.12289  |
|    |       |        |        | 158 | → | 168 | 0.14736  |
|    |       |        |        | 159 | → | 169 | 0.10226  |

**Table S10.** TDDFT calculated transitions for *mer*-[Ru(Q3PzH)<sub>2</sub>(Q3Pzc)]<sup>+</sup>.

| Excited State | Energy (eV) | Wavelength (nm) | f      | Transitions |   |     |          |
|---------------|-------------|-----------------|--------|-------------|---|-----|----------|
| 1             | 2.276       | 544.74          | 0.1307 | 159         | → | 161 | 0.10663  |
|               |             |                 |        | 160         | → | 161 | 0.69365  |
| 2             | 2.389       | 518.84          | 0.0062 | 160         | → | 162 | 0.64174  |
|               |             |                 |        | 160         | → | 163 | -0.27341 |
| 3             | 2.527       | 490.51          | 0.025  | 159         | → | 163 | 0.2383   |
|               |             |                 |        | 160         | → | 162 | 0.24128  |
|               |             |                 |        | 160         | → | 163 | 0.59157  |

|    |       |        |        |     |   |     |          |
|----|-------|--------|--------|-----|---|-----|----------|
| 4  | 2.564 | 483.55 | 0.0658 | 158 | → | 161 | 0.17809  |
|    |       |        |        | 159 | → | 161 | 0.66104  |
| 5  | 2.681 | 462.42 | 0.0548 | 158 | → | 162 | 0.18888  |
|    |       |        |        | 158 | → | 163 | 0.10337  |
|    |       |        |        | 159 | → | 162 | 0.57084  |
|    |       |        |        | 159 | → | 163 | 0.27341  |
|    |       |        |        | 160 | → | 163 | -0.13199 |
| 6  | 2.749 | 450.94 | 0.0464 | 157 | → | 161 | -0.10554 |
|    |       |        |        | 158 | → | 161 | 0.67003  |
|    |       |        |        | 159 | → | 161 | -0.16173 |
| 7  | 2.858 | 433.78 | 0.0292 | 157 | → | 162 | -0.12041 |
|    |       |        |        | 158 | → | 162 | 0.59851  |
|    |       |        |        | 158 | → | 163 | 0.25316  |
|    |       |        |        | 159 | → | 162 | -0.21021 |
| 8  | 2.907 | 426.39 | 0.0146 | 158 | → | 162 | -0.26312 |
|    |       |        |        | 158 | → | 163 | 0.47378  |
|    |       |        |        | 159 | → | 162 | -0.20928 |
|    |       |        |        | 159 | → | 163 | 0.371    |
| 9  | 3.048 | 406.75 | 0.0622 | 157 | → | 163 | 0.11197  |
|    |       |        |        | 158 | → | 162 | 0.1236   |
|    |       |        |        | 158 | → | 163 | -0.40848 |
|    |       |        |        | 159 | → | 162 | -0.22252 |
|    |       |        |        | 159 | → | 163 | 0.43684  |
| 10 | 3.291 | 376.73 | 0.0037 | 160 | → | 163 | -0.12626 |
|    |       |        |        | 157 | → | 161 | 0.68495  |
|    |       |        |        | 160 | → | 164 | -0.3205  |
|    |       |        |        | 160 | → | 165 | 0.42304  |
|    |       |        |        | 160 | → | 168 | -0.28165 |
| 11 | 3.359 | 369.07 | 0.0012 | 160 | → | 173 | 0.20612  |
|    |       |        |        | 157 | → | 162 | 0.66227  |
|    |       |        |        | 158 | → | 162 | 0.10226  |
|    |       |        |        | 159 | → | 162 | -0.10938 |
| 12 | 3.375 | 367.3  | 0.0417 | 160 | → | 164 | 0.55949  |
|    |       |        |        | 160 | → | 165 | 0.35912  |
|    |       |        |        | 160 | → | 167 | 0.16477  |
| 13 | 3.432 | 361.25 | 0.0083 | 157 | → | 163 | 0.60802  |
|    |       |        |        | 159 | → | 163 | -0.11724 |
|    |       |        |        | 159 | → | 165 | -0.12641 |
|    |       |        |        | 159 | → | 168 | 0.10956  |
|    |       |        |        | 159 | → | 173 | -0.14884 |
| 14 | 3.572 | 347.04 | 0.0114 | 157 | → | 162 | 0.11566  |
|    |       |        |        | 157 | → | 163 | 0.28854  |
|    |       |        |        | 159 | → | 164 | -0.24034 |
|    |       |        |        | 159 | → | 165 | 0.27503  |
|    |       |        |        | 159 | → | 168 | -0.2629  |
|    |       |        |        | 159 | → | 173 | 0.29646  |
| 15 | 3.616 | 342.84 | 0.0068 |     |   |     |          |

|    |       |        |        |     |   |     |          |
|----|-------|--------|--------|-----|---|-----|----------|
| 16 | 3.674 | 337.43 | 0.003  | 159 | → | 176 | -0.11578 |
|    |       |        |        | 160 | → | 164 | -0.147   |
|    |       |        |        | 160 | → | 166 | 0.64715  |
| 17 | 3.732 | 332.15 | 0.0046 | 160 | → | 167 | 0.16243  |
|    |       |        |        | 158 | → | 165 | -0.1148  |
|    |       |        |        | 158 | → | 173 | -0.10716 |
|    |       |        |        | 160 | → | 164 | -0.20203 |
|    |       |        |        | 160 | → | 165 | 0.28439  |
|    |       |        |        | 160 | → | 166 | -0.14977 |
|    |       |        |        | 160 | → | 167 | 0.34209  |
| 18 | 3.767 | 329.08 | 0.0081 | 160 | → | 168 | 0.30284  |
|    |       |        |        | 160 | → | 169 | 0.11205  |
|    |       |        |        | 160 | → | 173 | -0.19661 |
|    |       |        |        | 155 | → | 161 | -0.12037 |
|    |       |        |        | 156 | → | 161 | 0.54512  |
|    |       |        |        | 160 | → | 165 | -0.1296  |
|    |       |        |        | 160 | → | 166 | -0.11061 |
| 19 | 3.777 | 328.21 | 0.0091 | 160 | → | 167 | 0.33466  |
|    |       |        |        | 160 | → | 168 | -0.10351 |
|    |       |        |        | 156 | → | 161 | -0.3912  |
|    |       |        |        | 160 | → | 165 | -0.22638 |
|    |       |        |        | 160 | → | 167 | 0.41785  |
| 20 | 3.821 | 324.45 | 0.0035 | 160 | → | 168 | -0.2111  |
|    |       |        |        | 160 | → | 173 | 0.10004  |
|    |       |        |        | 158 | → | 165 | 0.12628  |
|    |       |        |        | 159 | → | 164 | 0.56698  |
|    |       |        |        | 159 | → | 165 | 0.28905  |
| 21 | 3.873 | 320.1  | 0.1504 | 159 | → | 167 | 0.13156  |
|    |       |        |        | 155 | → | 161 | 0.64809  |
|    |       |        |        | 156 | → | 162 | 0.13691  |
|    |       |        |        | 156 | → | 163 | 0.13036  |
| 22 | 3.919 | 316.37 | 0.0252 | 160 | → | 167 | 0.10055  |
|    |       |        |        | 158 | → | 164 | 0.3512   |
|    |       |        |        | 158 | → | 165 | -0.202   |
|    |       |        |        | 158 | → | 168 | 0.19491  |
|    |       |        |        | 158 | → | 173 | -0.21789 |
|    |       |        |        | 159 | → | 166 | 0.22359  |
|    |       |        |        | 160 | → | 168 | -0.28602 |
| 23 | 3.965 | 312.69 | 0.0042 | 160 | → | 177 | -0.11719 |
|    |       |        |        | 153 | → | 162 | -0.1163  |
|    |       |        |        | 158 | → | 164 | -0.12071 |
|    |       |        |        | 159 | → | 166 | 0.60233  |
| 24 | 3.993 | 310.46 | 0.0325 | 160 | → | 168 | 0.1188   |
|    |       |        |        | 158 | → | 164 | 0.43386  |
|    |       |        |        | 158 | → | 165 | 0.3348   |
|    |       |        |        | 158 | → | 167 | 0.18793  |

|    |       |        |        |     |   |     |          |
|----|-------|--------|--------|-----|---|-----|----------|
|    |       |        |        | 159 | → | 164 | -0.11666 |
|    |       |        |        | 160 | → | 168 | 0.19785  |
|    |       |        |        | 160 | → | 169 | -0.16338 |
| 25 | 4.03  | 307.62 | 0.0219 | 155 | → | 161 | -0.19443 |
|    |       |        |        | 156 | → | 162 | 0.57138  |
|    |       |        |        | 156 | → | 163 | 0.3202   |
| 26 | 4.035 | 307.22 | 0.0147 | 155 | → | 162 | -0.15942 |
|    |       |        |        | 159 | → | 164 | -0.20977 |
|    |       |        |        | 159 | → | 165 | 0.47057  |
|    |       |        |        | 159 | → | 167 | 0.11464  |
|    |       |        |        | 159 | → | 168 | 0.18329  |
|    |       |        |        | 159 | → | 169 | 0.10797  |
|    |       |        |        | 159 | → | 173 | -0.21562 |
|    |       |        |        | 160 | → | 169 | 0.11634  |
| 27 | 4.063 | 305.12 | 0.0186 | 158 | → | 164 | 0.1535   |
|    |       |        |        | 158 | → | 165 | 0.17419  |
|    |       |        |        | 158 | → | 166 | 0.12697  |
|    |       |        |        | 158 | → | 177 | -0.16145 |
|    |       |        |        | 159 | → | 165 | -0.11607 |
|    |       |        |        | 160 | → | 168 | -0.13498 |
|    |       |        |        | 160 | → | 169 | 0.40349  |
|    |       |        |        | 160 | → | 173 | -0.18153 |
|    |       |        |        | 160 | → | 177 | 0.21671  |
| 28 | 4.102 | 302.23 | 0.0054 | 155 | → | 162 | 0.58269  |
|    |       |        |        | 155 | → | 163 | 0.16772  |
|    |       |        |        | 156 | → | 163 | -0.2348  |
|    |       |        |        | 159 | → | 167 | 0.10995  |
| 29 | 4.134 | 299.9  | 0.0075 | 156 | → | 163 | 0.17198  |
|    |       |        |        | 158 | → | 164 | -0.15348 |
|    |       |        |        | 158 | → | 165 | 0.12938  |
|    |       |        |        | 159 | → | 165 | -0.12701 |
|    |       |        |        | 159 | → | 167 | 0.51888  |
|    |       |        |        | 160 | → | 169 | 0.10752  |
|    |       |        |        | 160 | → | 177 | -0.14661 |
| 30 | 4.143 | 299.25 | 0.0047 | 155 | → | 162 | -0.12623 |
|    |       |        |        | 156 | → | 162 | 0.19609  |
|    |       |        |        | 156 | → | 163 | -0.25286 |
|    |       |        |        | 158 | → | 164 | -0.16287 |
|    |       |        |        | 158 | → | 165 | 0.28331  |
|    |       |        |        | 159 | → | 167 | -0.19709 |
|    |       |        |        | 160 | → | 168 | -0.13932 |
|    |       |        |        | 160 | → | 171 | 0.10039  |
|    |       |        |        | 160 | → | 173 | -0.15278 |
|    |       |        |        | 160 | → | 174 | 0.11828  |
|    |       |        |        | 160 | → | 177 | -0.28211 |
| 31 | 4.158 | 298.13 | 0.0167 | 155 | → | 162 | 0.15598  |

|    |       |        |        |     |   |     |          |
|----|-------|--------|--------|-----|---|-----|----------|
|    |       |        |        | 156 | → | 162 | -0.29233 |
|    |       |        |        | 156 | → | 163 | 0.45236  |
|    |       |        |        | 158 | → | 165 | 0.12491  |
|    |       |        |        | 159 | → | 167 | -0.24358 |
|    |       |        |        | 160 | → | 173 | -0.12247 |
|    |       |        |        | 160 | → | 177 | -0.10698 |
| 32 | 4.196 | 295.44 | 0.0034 | 154 | → | 162 | 0.11611  |
|    |       |        |        | 155 | → | 163 | 0.55562  |
|    |       |        |        | 158 | → | 177 | 0.12653  |
|    |       |        |        | 160 | → | 169 | 0.21637  |
|    |       |        |        | 160 | → | 173 | 0.15535  |
| 33 | 4.226 | 293.38 | 0.0036 | 155 | → | 163 | -0.13823 |
|    |       |        |        | 158 | → | 164 | -0.16469 |
|    |       |        |        | 158 | → | 166 | 0.48525  |
|    |       |        |        | 158 | → | 167 | 0.22285  |
|    |       |        |        | 160 | → | 168 | 0.10628  |
|    |       |        |        | 160 | → | 169 | 0.19405  |
|    |       |        |        | 160 | → | 171 | -0.11135 |
|    |       |        |        | 160 | → | 173 | 0.19432  |
| 34 | 4.253 | 291.52 | 0.0183 | 155 | → | 162 | -0.17648 |
|    |       |        |        | 155 | → | 163 | 0.31634  |
|    |       |        |        | 158 | → | 166 | 0.30897  |
|    |       |        |        | 158 | → | 177 | -0.17685 |
|    |       |        |        | 159 | → | 167 | 0.11805  |
|    |       |        |        | 159 | → | 168 | 0.10309  |
|    |       |        |        | 159 | → | 169 | -0.10923 |
|    |       |        |        | 160 | → | 169 | -0.31505 |
|    |       |        |        | 160 | → | 173 | -0.13594 |
| 35 | 4.289 | 289.02 | 0.0027 | 154 | → | 161 | 0.14428  |
|    |       |        |        | 158 | → | 164 | -0.14842 |
|    |       |        |        | 158 | → | 166 | -0.23434 |
|    |       |        |        | 158 | → | 167 | 0.51947  |
|    |       |        |        | 158 | → | 177 | -0.11136 |
|    |       |        |        | 159 | → | 168 | -0.18675 |
| 36 | 4.319 | 287.06 | 0.0047 | 154 | → | 161 | 0.64398  |
|    |       |        |        | 158 | → | 167 | -0.10566 |
|    |       |        |        | 158 | → | 168 | -0.12374 |
| 37 | 4.334 | 286.04 | 0.0294 | 154 | → | 161 | 0.11118  |
|    |       |        |        | 158 | → | 166 | -0.16974 |
|    |       |        |        | 158 | → | 167 | 0.15422  |
|    |       |        |        | 158 | → | 168 | 0.13488  |
|    |       |        |        | 159 | → | 168 | 0.47773  |
|    |       |        |        | 159 | → | 169 | -0.21321 |
|    |       |        |        | 159 | → | 171 | -0.11043 |
|    |       |        |        | 159 | → | 173 | 0.19597  |
| 38 | 4.355 | 284.68 | 0.0018 | 154 | → | 161 | 0.12668  |

|    |       |        |        |     |   |     |          |
|----|-------|--------|--------|-----|---|-----|----------|
|    |       |        |        | 158 | → | 165 | 0.32705  |
|    |       |        |        | 158 | → | 167 | -0.21762 |
|    |       |        |        | 158 | → | 168 | 0.42463  |
|    |       |        |        | 158 | → | 173 | -0.1543  |
|    |       |        |        | 160 | → | 177 | 0.15837  |
| 39 | 4.486 | 276.35 | 0.0294 | 154 | → | 162 | 0.48121  |
|    |       |        |        | 157 | → | 164 | 0.22336  |
|    |       |        |        | 157 | → | 166 | -0.27809 |
|    |       |        |        | 159 | → | 166 | -0.10723 |
|    |       |        |        | 159 | → | 169 | -0.25565 |
| 40 | 4.497 | 275.69 | 0.0015 | 153 | → | 162 | 0.22465  |
|    |       |        |        | 154 | → | 162 | 0.1439   |
|    |       |        |        | 154 | → | 163 | 0.19286  |
|    |       |        |        | 157 | → | 164 | -0.25953 |
|    |       |        |        | 157 | → | 166 | 0.34674  |
|    |       |        |        | 159 | → | 168 | -0.12256 |
|    |       |        |        | 159 | → | 169 | -0.23379 |
|    |       |        |        | 159 | → | 173 | -0.14631 |

**Table S11.** TDDFT calculated transitions for *mer*-[Ru(Q3PzH<sub>a</sub>)(Q3Pz)<sub>2</sub>].

| Excited State | Energy (eV) | Wavelength (nm) | f      | Transitions |   |     |          |
|---------------|-------------|-----------------|--------|-------------|---|-----|----------|
| 1             | 2.1731      | 570.54          | 0.1431 | 158         | → | 161 | 0.11888  |
|               |             |                 |        | 159         | → | 161 | -0.13505 |
|               |             |                 |        | 160         | → | 161 | 0.67142  |
| 2             | 2.237       | 554.24          | 0.0128 | 159         | → | 161 | 0.6819   |
|               |             |                 |        | 160         | → | 161 | 0.12848  |
| 3             | 2.2592      | 548.79          | 0.0147 | 160         | → | 161 | 0.10009  |
|               |             |                 |        | 160         | → | 162 | 0.66423  |
|               |             |                 |        | 160         | → | 163 | -0.17972 |
| 4             | 2.4017      | 516.24          | 0.0293 | 158         | → | 163 | -0.13715 |
|               |             |                 |        | 159         | → | 162 | 0.46506  |
|               |             |                 |        | 159         | → | 163 | 0.27377  |
|               |             |                 |        | 160         | → | 162 | -0.10361 |
|               |             |                 |        | 160         | → | 163 | -0.39946 |
| 5             | 2.4152      | 513.34          | 0.0174 | 159         | → | 163 | 0.61474  |
|               |             |                 |        | 160         | → | 162 | 0.13837  |
|               |             |                 |        | 160         | → | 163 | 0.25506  |
| 6             | 2.4848      | 498.97          | 0.0022 | 158         | → | 162 | -0.17541 |
|               |             |                 |        | 158         | → | 163 | 0.25218  |
|               |             |                 |        | 159         | → | 162 | 0.46391  |
|               |             |                 |        | 159         | → | 163 | -0.1074  |
|               |             |                 |        | 160         | → | 163 | 0.37897  |
| 7             | 2.5488      | 486.45          | 0.077  | 158         | → | 161 | 0.66643  |
|               |             |                 |        | 158         | → | 163 | -0.12213 |
|               |             |                 |        | 160         | → | 161 | -0.1177  |

|    |        |        |        |     |   |     |          |
|----|--------|--------|--------|-----|---|-----|----------|
| 8  | 2.7291 | 454.31 | 0.0566 | 158 | → | 162 | 0.56765  |
|    |        |        |        | 158 | → | 163 | 0.34473  |
|    |        |        |        | 159 | → | 162 | 0.10379  |
|    |        |        |        | 160 | → | 163 | -0.1047  |
| 9  | 2.9005 | 427.46 | 0.0792 | 157 | → | 161 | -0.10591 |
|    |        |        |        | 158 | → | 162 | -0.33369 |
|    |        |        |        | 158 | → | 163 | 0.4907   |
|    |        |        |        | 159 | → | 162 | -0.18189 |
|    |        |        |        | 160 | → | 163 | -0.23057 |
| 10 | 3.0734 | 403.41 | 0.0139 | 157 | → | 161 | 0.68263  |
| 11 | 3.1926 | 388.35 | 0.0127 | 156 | → | 161 | 0.6842   |
|    |        |        |        | 157 | → | 161 | -0.10974 |
| 12 | 3.279  | 378.11 | 0.0582 | 157 | → | 162 | 0.61006  |
|    |        |        |        | 157 | → | 163 | 0.32249  |
| 13 | 3.309  | 374.69 | 0.0339 | 156 | → | 162 | 0.35017  |
|    |        |        |        | 160 | → | 164 | 0.45205  |
|    |        |        |        | 160 | → | 165 | 0.27158  |
|    |        |        |        | 160 | → | 166 | -0.11926 |
|    |        |        |        | 160 | → | 167 | 0.18747  |
| 14 | 3.3178 | 373.7  | 0.0384 | 156 | → | 162 | 0.57001  |
|    |        |        |        | 157 | → | 163 | 0.11098  |
|    |        |        |        | 160 | → | 164 | -0.31118 |
|    |        |        |        | 160 | → | 165 | -0.125   |
|    |        |        |        | 160 | → | 166 | 0.11124  |
|    |        |        |        | 160 | → | 167 | -0.11135 |
| 15 | 3.3668 | 368.26 | 0.0242 | 156 | → | 162 | -0.13991 |
|    |        |        |        | 157 | → | 162 | -0.34121 |
|    |        |        |        | 157 | → | 163 | 0.55874  |
|    |        |        |        | 160 | → | 164 | -0.11856 |
|    |        |        |        | 160 | → | 165 | 0.13033  |
| 16 | 3.4027 | 364.37 | 0.0063 | 157 | → | 163 | -0.19662 |
|    |        |        |        | 160 | → | 164 | -0.35547 |
|    |        |        |        | 160 | → | 165 | 0.49572  |
|    |        |        |        | 160 | → | 169 | 0.15947  |
| 17 | 3.4655 | 357.77 | 0.0094 | 156 | → | 163 | 0.64693  |
|    |        |        |        | 157 | → | 163 | -0.1158  |
|    |        |        |        | 158 | → | 163 | 0.1251   |
|    |        |        |        | 159 | → | 164 | -0.1032  |
| 18 | 3.5336 | 350.88 | 0.0101 | 156 | → | 163 | 0.12542  |
|    |        |        |        | 159 | → | 164 | 0.45269  |
|    |        |        |        | 159 | → | 165 | 0.16616  |
|    |        |        |        | 160 | → | 164 | -0.11725 |
|    |        |        |        | 160 | → | 166 | -0.41774 |
| 19 | 3.5548 | 348.78 | 0.003  | 160 | → | 167 | 0.11932  |
|    |        |        |        | 159 | → | 164 | 0.4941   |
|    |        |        |        | 160 | → | 164 | 0.15263  |

|    |        |        |        |     |   |     |          |
|----|--------|--------|--------|-----|---|-----|----------|
|    |        |        |        | 160 | → | 166 | 0.42475  |
|    |        |        |        | 160 | → | 167 | -0.1649  |
| 20 | 3.6343 | 341.15 | 0.0057 | 156 | → | 163 | 0.10001  |
|    |        |        |        | 159 | → | 164 | -0.12391 |
|    |        |        |        | 159 | → | 165 | 0.51311  |
|    |        |        |        | 159 | → | 169 | 0.12039  |
|    |        |        |        | 160 | → | 165 | -0.16432 |
|    |        |        |        | 160 | → | 166 | 0.24182  |
|    |        |        |        | 160 | → | 167 | 0.1073   |
|    |        |        |        | 160 | → | 169 | 0.12035  |
| 21 | 3.6471 | 339.95 | 0.0111 | 159 | → | 165 | -0.22772 |
|    |        |        |        | 160 | → | 165 | -0.26915 |
|    |        |        |        | 160 | → | 166 | 0.13342  |
|    |        |        |        | 160 | → | 167 | 0.44171  |
|    |        |        |        | 160 | → | 168 | -0.10538 |
|    |        |        |        | 160 | → | 169 | 0.15538  |
|    |        |        |        | 160 | → | 174 | 0.10104  |
|    |        |        |        | 160 | → | 175 | -0.11932 |
| 22 | 3.6958 | 335.47 | 0.0141 | 158 | → | 164 | 0.11306  |
|    |        |        |        | 159 | → | 166 | 0.64024  |
|    |        |        |        | 159 | → | 167 | -0.10092 |
|    |        |        |        | 159 | → | 168 | -0.10274 |
|    |        |        |        | 160 | → | 167 | 0.13294  |
| 23 | 3.7341 | 332.03 | 0.0019 | 158 | → | 164 | 0.23671  |
|    |        |        |        | 158 | → | 165 | 0.25976  |
|    |        |        |        | 158 | → | 167 | 0.17903  |
|    |        |        |        | 158 | → | 169 | 0.127    |
|    |        |        |        | 158 | → | 174 | 0.12433  |
|    |        |        |        | 158 | → | 175 | -0.14653 |
|    |        |        |        | 159 | → | 166 | -0.20462 |
|    |        |        |        | 160 | → | 166 | 0.11361  |
|    |        |        |        | 160 | → | 167 | 0.30854  |
|    |        |        |        | 160 | → | 169 | -0.1477  |
|    |        |        |        | 160 | → | 175 | 0.11462  |
| 24 | 3.79   | 327.13 | 0.0024 | 158 | → | 164 | 0.32067  |
|    |        |        |        | 158 | → | 165 | 0.10072  |
|    |        |        |        | 159 | → | 165 | -0.2366  |
|    |        |        |        | 159 | → | 167 | 0.16925  |
|    |        |        |        | 160 | → | 165 | -0.10794 |
|    |        |        |        | 160 | → | 167 | -0.22615 |
|    |        |        |        | 160 | → | 168 | -0.17609 |
|    |        |        |        | 160 | → | 169 | 0.28555  |
|    |        |        |        | 160 | → | 174 | 0.11155  |
|    |        |        |        | 160 | → | 175 | -0.11473 |
| 25 | 3.8339 | 323.39 | 0.0165 | 158 | → | 164 | 0.47711  |
|    |        |        |        | 158 | → | 165 | -0.14735 |



|    |        |        |        |     |   |     |          |
|----|--------|--------|--------|-----|---|-----|----------|
|    |        |        |        | 159 | → | 165 | 0.20272  |
|    |        |        |        | 159 | → | 167 | -0.2103  |
|    |        |        |        | 159 | → | 169 | -0.14822 |
|    |        |        |        | 159 | → | 174 | -0.12039 |
|    |        |        |        | 159 | → | 175 | 0.13913  |
| 26 | 3.8639 | 320.88 | 0.0256 | 155 | → | 161 | 0.16727  |
|    |        |        |        | 158 | → | 164 | 0.2246   |
|    |        |        |        | 158 | → | 165 | -0.23193 |
|    |        |        |        | 158 | → | 167 | -0.12109 |
|    |        |        |        | 158 | → | 174 | -0.10867 |
|    |        |        |        | 158 | → | 175 | 0.13113  |
|    |        |        |        | 159 | → | 167 | 0.38139  |
|    |        |        |        | 160 | → | 168 | 0.25824  |
| 27 | 3.8871 | 318.96 | 0.0547 | 154 | → | 161 | -0.16351 |
|    |        |        |        | 155 | → | 161 | 0.62267  |
|    |        |        |        | 160 | → | 168 | -0.14156 |
| 28 | 3.9378 | 314.86 | 0.0273 | 155 | → | 161 | -0.13939 |
|    |        |        |        | 158 | → | 165 | 0.14354  |
|    |        |        |        | 158 | → | 166 | 0.33926  |
|    |        |        |        | 158 | → | 167 | -0.12669 |
|    |        |        |        | 159 | → | 166 | 0.10158  |
|    |        |        |        | 159 | → | 167 | 0.32266  |
|    |        |        |        | 159 | → | 168 | 0.14617  |
|    |        |        |        | 159 | → | 169 | -0.209   |
|    |        |        |        | 159 | → | 174 | -0.11845 |
|    |        |        |        | 159 | → | 175 | 0.15899  |
|    |        |        |        | 160 | → | 176 | 0.12387  |
| 29 | 3.9531 | 313.64 | 0.0032 | 158 | → | 165 | -0.20312 |
|    |        |        |        | 158 | → | 166 | 0.50263  |
|    |        |        |        | 159 | → | 166 | -0.10669 |
|    |        |        |        | 159 | → | 167 | -0.27039 |
|    |        |        |        | 159 | → | 168 | -0.11475 |
|    |        |        |        | 159 | → | 169 | 0.13065  |
| 30 | 3.9805 | 311.48 | 0.0235 | 154 | → | 161 | 0.66212  |
|    |        |        |        | 155 | → | 161 | 0.15827  |
| 31 | 4.0191 | 308.48 | 0.0089 | 158 | → | 165 | -0.14445 |
|    |        |        |        | 158 | → | 174 | 0.10803  |
|    |        |        |        | 158 | → | 175 | -0.14306 |
|    |        |        |        | 160 | → | 168 | 0.44253  |
|    |        |        |        | 160 | → | 169 | 0.3834   |
| 32 | 4.035  | 307.27 | 0.0089 | 158 | → | 165 | 0.44612  |
|    |        |        |        | 158 | → | 166 | 0.18909  |
|    |        |        |        | 158 | → | 169 | -0.15472 |
|    |        |        |        | 158 | → | 172 | 0.1034   |
|    |        |        |        | 158 | → | 174 | -0.13505 |
|    |        |        |        | 158 | → | 175 | 0.17691  |

|    |        |        |        |     |   |     |          |
|----|--------|--------|--------|-----|---|-----|----------|
|    |        |        |        | 159 | → | 167 | -0.13549 |
|    |        |        |        | 160 | → | 168 | 0.20851  |
|    |        |        |        | 160 | → | 169 | 0.11724  |
| 33 | 4.077  | 304.1  | 0.0179 | 154 | → | 162 | -0.1302  |
|    |        |        |        | 158 | → | 176 | -0.12718 |
|    |        |        |        | 159 | → | 169 | -0.2127  |
|    |        |        |        | 159 | → | 176 | 0.26348  |
|    |        |        |        | 160 | → | 168 | -0.20746 |
|    |        |        |        | 160 | → | 169 | 0.26085  |
|    |        |        |        | 160 | → | 172 | 0.14924  |
|    |        |        |        | 160 | → | 174 | -0.16903 |
|    |        |        |        | 160 | → | 175 | 0.23243  |
|    |        |        |        | 160 | → | 176 | -0.14635 |
| 34 | 4.101  | 302.33 | 0.0104 | 153 | → | 162 | 0.12978  |
|    |        |        |        | 155 | → | 162 | 0.16653  |
|    |        |        |        | 159 | → | 168 | 0.56992  |
|    |        |        |        | 159 | → | 169 | 0.23856  |
| 35 | 4.1265 | 300.46 | 0.0046 | 156 | → | 167 | -0.10141 |
|    |        |        |        | 158 | → | 166 | 0.17594  |
|    |        |        |        | 158 | → | 167 | 0.5874   |
| 36 | 4.1483 | 298.88 | 0.0061 | 154 | → | 162 | -0.2583  |
|    |        |        |        | 154 | → | 163 | -0.1924  |
|    |        |        |        | 155 | → | 162 | 0.43544  |
|    |        |        |        | 155 | → | 163 | 0.36516  |
| 37 | 4.1931 | 295.68 | 0.0094 | 152 | → | 161 | -0.11306 |
|    |        |        |        | 153 | → | 161 | 0.57195  |
|    |        |        |        | 157 | → | 164 | 0.22731  |
|    |        |        |        | 157 | → | 165 | -0.13977 |
|    |        |        |        | 158 | → | 165 | 0.10644  |
|    |        |        |        | 159 | → | 169 | 0.11139  |
| 38 | 4.1993 | 295.25 | 0.0085 | 154 | → | 162 | 0.51088  |
|    |        |        |        | 155 | → | 162 | 0.39059  |
|    |        |        |        | 159 | → | 168 | -0.11353 |
|    |        |        |        | 159 | → | 169 | -0.14266 |
| 39 | 4.2152 | 294.14 | 0.0019 | 154 | → | 162 | 0.34754  |
|    |        |        |        | 154 | → | 163 | -0.13827 |
|    |        |        |        | 155 | → | 162 | -0.29348 |
|    |        |        |        | 155 | → | 163 | 0.46181  |
|    |        |        |        | 157 | → | 164 | -0.10464 |
| 40 | 4.2429 | 292.21 | 0.0154 | 152 | → | 161 | 0.1161   |
|    |        |        |        | 153 | → | 161 | -0.25031 |
|    |        |        |        | 155 | → | 163 | 0.15479  |
|    |        |        |        | 157 | → | 164 | 0.15815  |
|    |        |        |        | 157 | → | 165 | -0.13643 |
|    |        |        |        | 159 | → | 168 | -0.13313 |
|    |        |        |        | 159 | → | 169 | 0.33122  |

|     |   |     |          |
|-----|---|-----|----------|
| 160 | → | 168 | -0.10803 |
| 160 | → | 169 | 0.11074  |
| 160 | → | 171 | 0.14329  |
| 160 | → | 176 | 0.22993  |

**Table S12.** TDDFT calculated transitions for *mer*-[Ru(Q3PzH<sub>b</sub>)(Q3Pz)<sub>2</sub>].

| Excited State | Energy (eV) | Wavelength (nm) | f      | Transitions |   |     |          |
|---------------|-------------|-----------------|--------|-------------|---|-----|----------|
| 1             | 2.05        | 604.8           | 0.0021 | 160         | → | 161 | 0.22522  |
|               |             |                 |        | 160         | → | 162 | 0.63855  |
|               |             |                 |        | 160         | → | 163 | -0.18391 |
| 2             | 2.105       | 589             | 0.0491 | 160         | → | 161 | 0.65707  |
|               |             |                 |        | 160         | → | 162 | -0.23575 |
| 3             | 2.2279      | 556.51          | 0.0687 | 158         | → | 163 | -0.14256 |
|               |             |                 |        | 159         | → | 163 | 0.19692  |
|               |             |                 |        | 160         | → | 162 | 0.15977  |
|               |             |                 |        | 160         | → | 163 | 0.61792  |
| 4             | 2.4162      | 513.13          | 0.0011 | 159         | → | 161 | 0.56041  |
|               |             |                 |        | 159         | → | 162 | -0.28042 |
|               |             |                 |        | 159         | → | 163 | -0.29103 |
| 5             | 2.5253      | 490.98          | 0.063  | 159         | → | 161 | 0.39152  |
|               |             |                 |        | 159         | → | 162 | 0.26847  |
|               |             |                 |        | 159         | → | 163 | 0.48567  |
|               |             |                 |        | 160         | → | 163 | -0.12131 |
| 6             | 2.6339      | 470.73          | 0.1475 | 158         | → | 161 | 0.1356   |
|               |             |                 |        | 158         | → | 163 | -0.32897 |
|               |             |                 |        | 159         | → | 161 | 0.11248  |
|               |             |                 |        | 159         | → | 162 | 0.50287  |
|               |             |                 |        | 159         | → | 163 | -0.28114 |
| 7             | 2.6757      | 463.37          | 0.0123 | 158         | → | 161 | 0.19709  |
|               |             |                 |        | 158         | → | 162 | 0.64448  |
|               |             |                 |        | 159         | → | 163 | 0.10021  |
| 8             | 2.7257      | 454.87          | 0.0292 | 158         | → | 161 | 0.62174  |
|               |             |                 |        | 158         | → | 162 | -0.1458  |
|               |             |                 |        | 158         | → | 163 | 0.26     |
| 9             | 2.8445      | 435.87          | 0.0264 | 158         | → | 161 | -0.18475 |
|               |             |                 |        | 158         | → | 162 | 0.17956  |
|               |             |                 |        | 158         | → | 163 | 0.5037   |
|               |             |                 |        | 159         | → | 162 | 0.23753  |
|               |             |                 |        | 159         | → | 163 | -0.1693  |
|               |             |                 |        | 160         | → | 163 | 0.21045  |
| 10            | 3.1317      | 395.9           | 0.0497 | 156         | → | 161 | -0.18305 |
|               |             |                 |        | 157         | → | 161 | 0.649    |
| 11            | 3.1776      | 390.18          | 0.0598 | 156         | → | 161 | 0.13066  |
|               |             |                 |        | 156         | → | 162 | 0.17954  |
|               |             |                 |        | 157         | → | 162 | 0.64185  |
| 12            | 3.2243      | 384.53          | 0.0066 | 156         | → | 163 | 0.11219  |

|    |        |        |        |     |   |     |          |
|----|--------|--------|--------|-----|---|-----|----------|
|    |        |        |        | 157 | → | 161 | 0.10106  |
|    |        |        |        | 157 | → | 163 | -0.38716 |
|    |        |        |        | 160 | → | 165 | 0.49158  |
|    |        |        |        | 160 | → | 167 | 0.16612  |
| 13 | 3.2508 | 381.4  | 0.0559 | 156 | → | 161 | -0.21498 |
|    |        |        |        | 156 | → | 162 | -0.2083  |
|    |        |        |        | 157 | → | 162 | 0.1192   |
|    |        |        |        | 157 | → | 163 | 0.43618  |
|    |        |        |        | 160 | → | 165 | 0.39221  |
|    |        |        |        | 160 | → | 167 | 0.1073   |
| 14 | 3.2794 | 378.07 | 0.0146 | 156 | → | 161 | 0.1399   |
|    |        |        |        | 156 | → | 162 | 0.28107  |
|    |        |        |        | 156 | → | 163 | -0.11981 |
|    |        |        |        | 157 | → | 162 | -0.15277 |
|    |        |        |        | 157 | → | 163 | 0.12002  |
|    |        |        |        | 160 | → | 164 | 0.55695  |
|    |        |        |        | 160 | → | 165 | 0.1353   |
| 15 | 3.3153 | 373.98 | 0.0273 | 156 | → | 161 | 0.14614  |
|    |        |        |        | 156 | → | 162 | 0.46162  |
|    |        |        |        | 156 | → | 163 | -0.15214 |
|    |        |        |        | 157 | → | 162 | -0.12153 |
|    |        |        |        | 157 | → | 163 | 0.23056  |
|    |        |        |        | 160 | → | 164 | -0.39773 |
| 16 | 3.3215 | 373.27 | 0.0029 | 156 | → | 161 | 0.5656   |
|    |        |        |        | 156 | → | 162 | -0.31876 |
|    |        |        |        | 156 | → | 163 | -0.14923 |
|    |        |        |        | 157 | → | 161 | 0.16675  |
|    |        |        |        | 157 | → | 163 | 0.10392  |
| 17 | 3.4573 | 358.62 | 0.0004 | 160 | → | 166 | 0.67858  |
| 18 | 3.4923 | 355.02 | 0.0025 | 156 | → | 161 | 0.14629  |
|    |        |        |        | 156 | → | 163 | 0.62565  |
|    |        |        |        | 157 | → | 163 | 0.23336  |
| 19 | 3.5607 | 348.21 | 0.017  | 160 | → | 165 | -0.2402  |
|    |        |        |        | 160 | → | 167 | 0.63166  |
| 20 | 3.5832 | 346.02 | 0.0013 | 159 | → | 164 | -0.25426 |
|    |        |        |        | 159 | → | 165 | 0.52838  |
|    |        |        |        | 159 | → | 167 | 0.24906  |
|    |        |        |        | 159 | → | 175 | 0.17416  |
| 21 | 3.6196 | 342.53 | 0.0035 | 159 | → | 164 | 0.59394  |
|    |        |        |        | 159 | → | 165 | 0.25569  |
|    |        |        |        | 159 | → | 166 | 0.16429  |
|    |        |        |        | 159 | → | 167 | 0.11461  |
| 22 | 3.7742 | 328.5  | 0.0034 | 158 | → | 164 | 0.11691  |
|    |        |        |        | 159 | → | 166 | 0.1709   |
|    |        |        |        | 160 | → | 167 | 0.14083  |
|    |        |        |        | 160 | → | 168 | 0.3057   |

|    |        |        |        |     |   |     |          |
|----|--------|--------|--------|-----|---|-----|----------|
|    |        |        |        | 160 | → | 169 | 0.45327  |
|    |        |        |        | 160 | → | 175 | -0.17804 |
|    |        |        |        | 160 | → | 176 | 0.11962  |
| 23 | 3.8034 | 325.98 | 0.0353 | 158 | → | 164 | -0.15359 |
|    |        |        |        | 158 | → | 165 | 0.46547  |
|    |        |        |        | 158 | → | 167 | 0.2195   |
|    |        |        |        | 158 | → | 172 | -0.12216 |
|    |        |        |        | 158 | → | 175 | 0.23619  |
|    |        |        |        | 160 | → | 168 | 0.19858  |
| 24 | 3.8348 | 323.31 | 0.0445 | 155 | → | 161 | 0.10406  |
|    |        |        |        | 159 | → | 164 | 0.10341  |
|    |        |        |        | 159 | → | 166 | -0.22806 |
|    |        |        |        | 160 | → | 168 | 0.47279  |
|    |        |        |        | 160 | → | 169 | -0.32601 |
|    |        |        |        | 160 | → | 176 | -0.12645 |
| 25 | 3.8392 | 322.95 | 0.0075 | 159 | → | 164 | -0.18923 |
|    |        |        |        | 159 | → | 166 | 0.54007  |
|    |        |        |        | 159 | → | 168 | 0.13538  |
|    |        |        |        | 159 | → | 175 | -0.11173 |
|    |        |        |        | 160 | → | 168 | 0.12259  |
|    |        |        |        | 160 | → | 169 | -0.2506  |
|    |        |        |        | 160 | → | 176 | -0.10461 |
| 26 | 3.8884 | 318.86 | 0.0559 | 155 | → | 161 | 0.63949  |
|    |        |        |        | 155 | → | 162 | -0.11501 |
|    |        |        |        | 159 | → | 166 | 0.13433  |
|    |        |        |        | 159 | → | 167 | 0.10026  |
| 27 | 3.9222 | 316.11 | 0.0039 | 155 | → | 161 | -0.13702 |
|    |        |        |        | 158 | → | 164 | 0.19265  |
|    |        |        |        | 158 | → | 165 | 0.1273   |
|    |        |        |        | 159 | → | 165 | -0.33388 |
|    |        |        |        | 159 | → | 167 | 0.41604  |
|    |        |        |        | 159 | → | 168 | -0.14686 |
|    |        |        |        | 159 | → | 172 | -0.1056  |
|    |        |        |        | 159 | → | 175 | 0.20063  |
| 28 | 3.9574 | 313.3  | 0.0037 | 154 | → | 162 | 0.1245   |
|    |        |        |        | 158 | → | 164 | 0.58172  |
|    |        |        |        | 158 | → | 165 | 0.20161  |
|    |        |        |        | 159 | → | 168 | 0.1042   |
| 29 | 4.0002 | 309.95 | 0.0187 | 155 | → | 162 | 0.41787  |
|    |        |        |        | 155 | → | 163 | 0.52247  |
| 30 | 4.0089 | 309.27 | 0.0017 | 154 | → | 162 | 0.11675  |
|    |        |        |        | 155 | → | 162 | -0.19497 |
|    |        |        |        | 158 | → | 166 | 0.10067  |
|    |        |        |        | 159 | → | 166 | -0.16081 |
|    |        |        |        | 159 | → | 167 | 0.41637  |
|    |        |        |        | 159 | → | 168 | 0.25414  |

|    |        |        |        |     |   |     |          |
|----|--------|--------|--------|-----|---|-----|----------|
|    |        |        |        | 159 | → | 169 | 0.10412  |
|    |        |        |        | 159 | → | 172 | 0.11704  |
|    |        |        |        | 159 | → | 175 | -0.2201  |
|    |        |        |        | 160 | → | 175 | -0.10648 |
| 31 | 4.0493 | 306.19 | 0.0088 | 154 | → | 162 | 0.20165  |
|    |        |        |        | 155 | → | 161 | 0.12539  |
|    |        |        |        | 155 | → | 162 | 0.44287  |
|    |        |        |        | 155 | → | 163 | -0.4052  |
|    |        |        |        | 158 | → | 166 | 0.18802  |
| 32 | 4.0672 | 304.84 | 0.0052 | 154 | → | 161 | 0.35458  |
|    |        |        |        | 154 | → | 162 | 0.3779   |
|    |        |        |        | 155 | → | 162 | -0.19992 |
|    |        |        |        | 158 | → | 164 | -0.12792 |
|    |        |        |        | 158 | → | 165 | 0.18357  |
|    |        |        |        | 158 | → | 175 | -0.11712 |
|    |        |        |        | 159 | → | 169 | -0.10937 |
| 33 | 4.0878 | 303.3  | 0.0004 | 154 | → | 161 | 0.17844  |
|    |        |        |        | 158 | → | 164 | 0.16871  |
|    |        |        |        | 158 | → | 165 | -0.28177 |
|    |        |        |        | 158 | → | 166 | 0.3033   |
|    |        |        |        | 158 | → | 167 | 0.21157  |
|    |        |        |        | 158 | → | 169 | -0.13237 |
|    |        |        |        | 158 | → | 175 | 0.14451  |
|    |        |        |        | 158 | → | 176 | -0.11856 |
|    |        |        |        | 160 | → | 168 | 0.13179  |
|    |        |        |        | 160 | → | 175 | 0.16123  |
|    |        |        |        | 160 | → | 176 | 0.17178  |
| 34 | 4.1004 | 302.37 | 0.0045 | 154 | → | 161 | 0.49631  |
|    |        |        |        | 154 | → | 162 | -0.17227 |
|    |        |        |        | 155 | → | 163 | -0.10929 |
|    |        |        |        | 158 | → | 165 | -0.10143 |
|    |        |        |        | 158 | → | 166 | -0.33086 |
|    |        |        |        | 159 | → | 167 | 0.10557  |
| 35 | 4.1209 | 300.87 | 0.0175 | 154 | → | 161 | -0.18127 |
|    |        |        |        | 154 | → | 162 | 0.43808  |
|    |        |        |        | 158 | → | 165 | -0.13408 |
|    |        |        |        | 158 | → | 166 | -0.3914  |
|    |        |        |        | 158 | → | 167 | 0.17441  |
| 36 | 4.1802 | 296.6  | 0.0047 | 153 | → | 161 | -0.11884 |
|    |        |        |        | 154 | → | 163 | 0.18928  |
|    |        |        |        | 158 | → | 166 | -0.14617 |
|    |        |        |        | 158 | → | 167 | -0.13833 |
|    |        |        |        | 158 | → | 176 | -0.14075 |
|    |        |        |        | 159 | → | 168 | 0.25628  |
|    |        |        |        | 159 | → | 169 | -0.20578 |
|    |        |        |        | 160 | → | 169 | -0.17505 |

|    |        |        |        |     |   |     |          |
|----|--------|--------|--------|-----|---|-----|----------|
|    |        |        |        | 160 | → | 174 | 0.10666  |
|    |        |        |        | 160 | → | 176 | 0.37194  |
| 37 | 4.2051 | 294.84 | 0.0059 | 153 | → | 162 | -0.12595 |
|    |        |        |        | 153 | → | 163 | -0.17732 |
|    |        |        |        | 154 | → | 162 | -0.11043 |
|    |        |        |        | 154 | → | 163 | 0.14896  |
|    |        |        |        | 157 | → | 164 | -0.12992 |
|    |        |        |        | 158 | → | 167 | 0.39431  |
|    |        |        |        | 159 | → | 169 | -0.12575 |
|    |        |        |        | 160 | → | 168 | -0.19048 |
|    |        |        |        | 160 | → | 171 | 0.13674  |
|    |        |        |        | 160 | → | 172 | 0.14893  |
|    |        |        |        | 160 | → | 175 | -0.24299 |
| 38 | 4.2356 | 292.72 | 0.0029 | 153 | → | 161 | 0.11901  |
|    |        |        |        | 154 | → | 163 | -0.25261 |
|    |        |        |        | 156 | → | 164 | 0.13911  |
|    |        |        |        | 156 | → | 166 | 0.16013  |
|    |        |        |        | 157 | → | 164 | 0.37388  |
|    |        |        |        | 158 | → | 166 | -0.13031 |
|    |        |        |        | 158 | → | 167 | 0.11021  |
|    |        |        |        | 159 | → | 168 | -0.23717 |
|    |        |        |        | 160 | → | 169 | -0.11427 |
|    |        |        |        | 160 | → | 172 | 0.10002  |
|    |        |        |        | 160 | → | 175 | -0.15614 |
|    |        |        |        | 160 | → | 176 | 0.16002  |
| 39 | 4.2558 | 291.33 | 0.0101 | 153 | → | 161 | -0.17751 |
|    |        |        |        | 153 | → | 163 | -0.11374 |
|    |        |        |        | 154 | → | 161 | 0.105    |
|    |        |        |        | 154 | → | 163 | 0.46414  |
|    |        |        |        | 156 | → | 164 | 0.10098  |
|    |        |        |        | 157 | → | 164 | 0.18721  |
|    |        |        |        | 158 | → | 167 | -0.16289 |
|    |        |        |        | 159 | → | 168 | -0.27594 |
| 40 | 4.2659 | 290.64 | 0.0147 | 150 | → | 163 | -0.11217 |
|    |        |        |        | 153 | → | 161 | 0.10127  |
|    |        |        |        | 154 | → | 163 | 0.15786  |
|    |        |        |        | 156 | → | 166 | 0.12042  |
|    |        |        |        | 157 | → | 164 | 0.35248  |
|    |        |        |        | 157 | → | 166 | -0.11845 |
|    |        |        |        | 158 | → | 167 | 0.1557   |
|    |        |        |        | 158 | → | 169 | 0.10993  |
|    |        |        |        | 158 | → | 176 | 0.12004  |
|    |        |        |        | 159 | → | 168 | 0.29835  |
|    |        |        |        | 159 | → | 175 | 0.15786  |
|    |        |        |        | 160 | → | 175 | 0.10362  |

**Table S13.** TDDFT calculated transitions for *mer*-[Ru(Q3PzH<sub>c</sub>)(Q3Pz)<sub>2</sub>].

| Excited State | Energy (eV) | Wavelength (nm) | f      | Transitions |   |     |          |
|---------------|-------------|-----------------|--------|-------------|---|-----|----------|
| 1             | 1.9785      | 626.65          | 0.0066 | 160         | → | 161 | 0.69684  |
| 2             | 2.1641      | 572.9           | 0.1234 | 158         | → | 162 | -0.10213 |
|               |             |                 |        | 160         | → | 162 | 0.69115  |
| 3             | 2.3491      | 527.78          | 0.0419 | 158         | → | 161 | -0.20997 |
|               |             |                 |        | 158         | → | 163 | -0.1464  |
|               |             |                 |        | 159         | → | 161 | 0.18997  |
|               |             |                 |        | 160         | → | 163 | 0.6112   |
| 4             | 2.4337      | 509.45          | 0.0161 | 158         | → | 161 | 0.62668  |
|               |             |                 |        | 159         | → | 161 | 0.27198  |
|               |             |                 |        | 160         | → | 163 | 0.13446  |
| 5             | 2.4998      | 495.99          | 0.0197 | 158         | → | 162 | -0.25727 |
|               |             |                 |        | 159         | → | 161 | -0.17761 |
|               |             |                 |        | 159         | → | 162 | 0.61769  |
| 6             | 2.5234      | 491.34          | 0.0457 | 158         | → | 161 | -0.21062 |
|               |             |                 |        | 159         | → | 161 | 0.4726   |
|               |             |                 |        | 159         | → | 162 | 0.21067  |
|               |             |                 |        | 159         | → | 163 | 0.36998  |
|               |             |                 |        | 160         | → | 163 | -0.17196 |
| 7             | 2.6194      | 473.33          | 0.1175 | 158         | → | 162 | 0.62621  |
|               |             |                 |        | 158         | → | 163 | -0.12143 |
|               |             |                 |        | 159         | → | 162 | 0.2316   |
|               |             |                 |        | 160         | → | 162 | 0.11687  |
| 8             | 2.6768      | 463.18          | 0.0342 | 158         | → | 162 | 0.13717  |
|               |             |                 |        | 158         | → | 163 | 0.45775  |
|               |             |                 |        | 159         | → | 161 | 0.23798  |
|               |             |                 |        | 159         | → | 163 | -0.4337  |
| 9             | 2.8517      | 434.77          | 0.0069 | 157         | → | 162 | -0.11114 |
|               |             |                 |        | 158         | → | 163 | 0.46693  |
|               |             |                 |        | 159         | → | 161 | -0.21458 |
|               |             |                 |        | 159         | → | 163 | 0.35056  |
|               |             |                 |        | 160         | → | 163 | 0.2259   |
| 10            | 3.0785      | 402.74          | 0.0164 | 157         | → | 161 | 0.60551  |
|               |             |                 |        | 157         | → | 162 | -0.33711 |
| 11            | 3.1077      | 398.96          | 0.0018 | 157         | → | 161 | 0.33405  |
|               |             |                 |        | 157         | → | 162 | 0.59528  |
|               |             |                 |        | 160         | → | 164 | -0.10918 |
| 12            | 3.2283      | 384.06          | 0.0086 | 160         | → | 164 | 0.66472  |
| 13            | 3.3406      | 371.14          | 0.1166 | 156         | → | 162 | -0.1597  |
|               |             |                 |        | 157         | → | 163 | 0.65593  |
|               |             |                 |        | 160         | → | 165 | 0.12129  |
| 14            | 3.3933      | 365.38          | 0.0095 | 157         | → | 163 | -0.1337  |
|               |             |                 |        | 160         | → | 165 | 0.54129  |
|               |             |                 |        | 160         | → | 166 | -0.3238  |
|               |             |                 |        | 160         | → | 169 | -0.17162 |



|     |        |        |         |     |        |        |          |
|-----|--------|--------|---------|-----|--------|--------|----------|
| 15  | 3.4206 | 362.46 | 0.0123  | 156 | →      | 162    | 0.47992  |
|     |        |        |         | 157 | →      | 163    | 0.13772  |
|     |        |        |         | 160 | →      | 165    | -0.27543 |
|     |        |        |         | 160 | →      | 166    | -0.37773 |
| 16  | 3.4526 | 359.1  | 0.0144  | 156 | →      | 162    | 0.45944  |
|     |        |        |         | 157 | →      | 163    | 0.10474  |
|     |        |        |         | 160 | →      | 165    | 0.24521  |
|     |        |        |         | 160 | →      | 166    | 0.44118  |
| 17  | 3.4657 | 357.75 | 0.003   | 156 | →      | 161    | 0.68059  |
| 18  | 3.5379 | 350.45 | 0.0033  | 156 | →      | 162    | -0.10273 |
|     |        |        |         | 159 | →      | 164    | -0.39898 |
|     |        |        |         | 159 | →      | 167    | -0.13182 |
|     |        |        |         | 160 | →      | 164    | -0.1394  |
| 19  | 3.5663 | 347.66 | 0.0113  | 160 | →      | 167    | 0.48197  |
|     |        |        |         | 158 | →      | 164    | -0.15887 |
|     |        |        |         | 159 | →      | 164    | 0.49672  |
|     |        |        |         | 159 | →      | 167    | 0.13663  |
| 20  | 3.6635 | 338.43 | 0.006   | 160 | →      | 167    | 0.33868  |
|     |        |        |         | 156 | →      | 163    | 0.57433  |
|     |        |        |         | 158 | →      | 164    | -0.12835 |
|     |        |        |         | 160 | →      | 166    | 0.1157   |
| 21  | 3.7155 | 333.7  | 0.0181  | 160 | →      | 167    | 0.16376  |
|     |        |        |         | 160 | →      | 169    | -0.15766 |
|     |        |        |         | 156 | →      | 163    | 0.35181  |
|     |        |        |         | 159 | →      | 165    | -0.12474 |
| 22  | 3.7233 | 333    | 0.0487  | 159 | →      | 169    | 0.13805  |
|     |        |        |         | 159 | →      | 173    | -0.10913 |
|     |        |        |         | 159 | →      | 175    | 0.14009  |
|     |        |        |         | 160 | →      | 166    | -0.12049 |
| 23  | 3.7733 | 328.58 | 0.0012  | 160 | →      | 167    | -0.16659 |
|     |        |        |         | 160 | →      | 169    | 0.34823  |
|     |        |        |         | 160 | →      | 173    | -0.15731 |
|     |        |        |         | 160 | →      | 175    | 0.18872  |
| 22  | 3.7233 | 333    | 0.0487  | 158 | →      | 164    | 0.60188  |
|     |        |        |         | 158 | →      | 167    | 0.14759  |
|     |        |        |         | 160 | →      | 167    | 0.20395  |
|     |        |        |         | 23  | 3.7733 | 328.58 | 0.0012   |
| 158 | →      | 166    | 0.11092 |     |        |        |          |
| 158 | →      | 169    | 0.12909 |     |        |        |          |
| 159 | →      | 165    | 0.27458 |     |        |        |          |
| 23  | 3.7733 | 328.58 | 0.0012  | 159 | →      | 166    | -0.20375 |
|     |        |        |         | 159 | →      | 169    | -0.21918 |
|     |        |        |         | 159 | →      | 173    | 0.16722  |
|     |        |        |         | 159 | →      | 175    | -0.20102 |
| 23  | 3.7733 | 328.58 | 0.0012  | 160 | →      | 168    | -0.24969 |
|     |        |        |         | 160 | →      | 169    | 0.18012  |

|    |        |        |        |     |   |     |          |
|----|--------|--------|--------|-----|---|-----|----------|
|    |        |        |        | 160 | → | 177 | 0.11936  |
| 24 | 3.8156 | 324.94 | 0.0192 | 155 | → | 161 | 0.38368  |
|    |        |        |        | 155 | → | 162 | -0.1201  |
|    |        |        |        | 159 | → | 166 | -0.12658 |
|    |        |        |        | 160 | → | 168 | 0.50882  |
| 25 | 3.8293 | 323.78 | 0.0559 | 155 | → | 161 | 0.52716  |
|    |        |        |        | 158 | → | 165 | 0.10007  |
|    |        |        |        | 159 | → | 167 | 0.1193   |
|    |        |        |        | 160 | → | 168 | -0.32136 |
| 26 | 3.8673 | 320.6  | 0.0122 | 154 | → | 162 | 0.12397  |
|    |        |        |        | 155 | → | 162 | 0.59288  |
|    |        |        |        | 159 | → | 165 | 0.23614  |
|    |        |        |        | 159 | → | 167 | 0.11768  |
|    |        |        |        | 160 | → | 168 | 0.15737  |
| 27 | 3.8794 | 319.59 | 0.0109 | 155 | → | 161 | -0.11715 |
|    |        |        |        | 155 | → | 162 | -0.26252 |
|    |        |        |        | 159 | → | 164 | -0.11613 |
|    |        |        |        | 159 | → | 165 | 0.48669  |
|    |        |        |        | 159 | → | 166 | 0.26918  |
|    |        |        |        | 159 | → | 167 | 0.19886  |
| 28 | 3.8962 | 318.22 | 0.0112 | 158 | → | 165 | 0.15885  |
|    |        |        |        | 159 | → | 164 | 0.15723  |
|    |        |        |        | 159 | → | 166 | 0.48043  |
|    |        |        |        | 159 | → | 167 | -0.3354  |
|    |        |        |        | 159 | → | 175 | -0.118   |
|    |        |        |        | 160 | → | 169 | 0.10869  |
| 29 | 3.9326 | 315.27 | 0.0031 | 155 | → | 162 | -0.12353 |
|    |        |        |        | 158 | → | 165 | 0.51648  |
|    |        |        |        | 158 | → | 166 | -0.12732 |
|    |        |        |        | 158 | → | 169 | -0.10026 |
|    |        |        |        | 159 | → | 165 | 0.15153  |
|    |        |        |        | 159 | → | 166 | -0.23399 |
|    |        |        |        | 160 | → | 169 | 0.14443  |
| 30 | 3.9556 | 313.44 | 0.0053 | 158 | → | 164 | -0.126   |
|    |        |        |        | 158 | → | 165 | 0.33549  |
|    |        |        |        | 158 | → | 166 | 0.47456  |
|    |        |        |        | 158 | → | 167 | 0.19808  |
|    |        |        |        | 158 | → | 169 | 0.12256  |
|    |        |        |        | 158 | → | 175 | 0.10587  |
|    |        |        |        | 159 | → | 165 | -0.12209 |
| 31 | 3.9675 | 312.5  | 0.0117 | 158 | → | 164 | -0.19415 |
|    |        |        |        | 158 | → | 166 | -0.3809  |
|    |        |        |        | 158 | → | 167 | 0.47549  |
|    |        |        |        | 158 | → | 169 | 0.13125  |
|    |        |        |        | 158 | → | 175 | 0.11439  |
| 32 | 4.032  | 307.5  | 0.0243 | 154 | → | 161 | 0.28871  |

|    |        |        |        |     |   |     |          |
|----|--------|--------|--------|-----|---|-----|----------|
|    |        |        |        | 155 | → | 163 | 0.12822  |
|    |        |        |        | 158 | → | 166 | -0.11211 |
|    |        |        |        | 158 | → | 167 | -0.1457  |
|    |        |        |        | 159 | → | 165 | -0.17582 |
|    |        |        |        | 159 | → | 166 | 0.17711  |
|    |        |        |        | 159 | → | 167 | 0.42723  |
|    |        |        |        | 159 | → | 169 | -0.17684 |
|    |        |        |        | 159 | → | 173 | 0.11882  |
|    |        |        |        | 159 | → | 175 | -0.14388 |
|    |        |        |        | 160 | → | 169 | 0.10799  |
| 33 | 4.0558 | 305.69 | 0.0225 | 154 | → | 161 | 0.54376  |
|    |        |        |        | 155 | → | 161 | 0.10366  |
|    |        |        |        | 158 | → | 165 | -0.10476 |
|    |        |        |        | 159 | → | 167 | -0.13104 |
|    |        |        |        | 160 | → | 176 | -0.12529 |
|    |        |        |        | 160 | → | 177 | -0.19239 |
| 34 | 4.096  | 302.7  | 0.005  | 154 | → | 161 | 0.24835  |
|    |        |        |        | 158 | → | 167 | -0.21998 |
|    |        |        |        | 158 | → | 175 | 0.1178   |
|    |        |        |        | 158 | → | 176 | -0.10452 |
|    |        |        |        | 158 | → | 177 | -0.18598 |
|    |        |        |        | 159 | → | 167 | -0.18614 |
|    |        |        |        | 159 | → | 169 | 0.10611  |
|    |        |        |        | 159 | → | 175 | 0.12018  |
|    |        |        |        | 160 | → | 171 | 0.10735  |
|    |        |        |        | 160 | → | 175 | -0.13141 |
|    |        |        |        | 160 | → | 176 | 0.17318  |
|    |        |        |        | 160 | → | 177 | 0.30158  |
|    |        |        |        | 160 | → | 179 | 0.11518  |
| 35 | 4.1241 | 300.64 | 0.0005 | 154 | → | 161 | -0.10649 |
|    |        |        |        | 154 | → | 163 | 0.14134  |
|    |        |        |        | 155 | → | 163 | 0.66693  |
| 36 | 4.1455 | 299.08 | 0.0017 | 157 | → | 165 | -0.12413 |
|    |        |        |        | 158 | → | 165 | 0.11138  |
|    |        |        |        | 158 | → | 166 | -0.18231 |
|    |        |        |        | 158 | → | 167 | -0.28542 |
|    |        |        |        | 158 | → | 169 | 0.2987   |
|    |        |        |        | 158 | → | 173 | -0.14584 |
|    |        |        |        | 158 | → | 175 | 0.15327  |
|    |        |        |        | 158 | → | 176 | 0.10699  |
|    |        |        |        | 158 | → | 177 | 0.17642  |
|    |        |        |        | 160 | → | 169 | -0.27465 |
|    |        |        |        | 160 | → | 173 | -0.12168 |
|    |        |        |        | 160 | → | 175 | 0.13937  |
| 37 | 4.2009 | 295.14 | 0.0042 | 154 | → | 162 | 0.67733  |
|    |        |        |        | 155 | → | 162 | -0.14715 |

|    |        |        |        |     |   |     |          |
|----|--------|--------|--------|-----|---|-----|----------|
| 38 | 4.2611 | 290.97 | 0.0036 | 152 | → | 162 | -0.11243 |
|    |        |        |        | 153 | → | 162 | -0.14844 |
|    |        |        |        | 157 | → | 164 | 0.19522  |
|    |        |        |        | 157 | → | 165 | 0.28069  |
|    |        |        |        | 157 | → | 166 | 0.10748  |
|    |        |        |        | 159 | → | 168 | 0.51169  |
| 39 | 4.2811 | 289.61 | 0.0082 | 152 | → | 162 | -0.11365 |
|    |        |        |        | 157 | → | 164 | 0.2867   |
|    |        |        |        | 157 | → | 165 | 0.39913  |
|    |        |        |        | 158 | → | 168 | -0.19707 |
|    |        |        |        | 159 | → | 168 | -0.34666 |
| 40 | 4.3057 | 287.95 | 0.0043 | 152 | → | 162 | 0.10428  |
|    |        |        |        | 153 | → | 162 | -0.18162 |
|    |        |        |        | 157 | → | 164 | 0.41715  |
|    |        |        |        | 157 | → | 165 | -0.30078 |
|    |        |        |        | 157 | → | 166 | 0.17478  |
|    |        |        |        | 157 | → | 167 | 0.11418  |
|    |        |        |        | 158 | → | 168 | -0.27242 |

**Table S14.** TDDFT calculated transitions for *mer*-[Ru(Q3Pz)<sub>3</sub>]<sup>-</sup>.

| Excited State | Energy (eV) | Wavelength (nm) | f      | Transitions |   |     |          |
|---------------|-------------|-----------------|--------|-------------|---|-----|----------|
| 1             | 1.9128      | 648.19          | 0.0425 | 158         | → | 161 | -0.11438 |
|               |             |                 |        | 159         | → | 161 | -0.10268 |
|               |             |                 |        | 160         | → | 161 | 0.67766  |
| 2             | 1.9663      | 630.54          | 0.0234 | 159         | → | 161 | 0.13227  |
|               |             |                 |        | 160         | → | 162 | 0.67406  |
| 3             | 2.0862      | 594.3           | 0.0042 | 159         | → | 161 | 0.45802  |
|               |             |                 |        | 159         | → | 162 | 0.29278  |
|               |             |                 |        | 159         | → | 163 | -0.29943 |
|               |             |                 |        | 160         | → | 163 | 0.30971  |
| 4             | 2.1036      | 589.38          | 0.014  | 159         | → | 161 | -0.32783 |
|               |             |                 |        | 159         | → | 162 | -0.22413 |
|               |             |                 |        | 159         | → | 163 | -0.14866 |
|               |             |                 |        | 160         | → | 162 | 0.10005  |
|               |             |                 |        | 160         | → | 163 | 0.53577  |
| 5             | 2.2089      | 561.29          | 0.0926 | 158         | → | 161 | 0.16303  |
|               |             |                 |        | 159         | → | 161 | -0.32122 |
|               |             |                 |        | 159         | → | 162 | 0.5689   |
|               |             |                 |        | 160         | → | 162 | 0.12544  |
| 6             | 2.3787      | 521.22          | 0.1362 | 158         | → | 161 | 0.48143  |
|               |             |                 |        | 158         | → | 163 | -0.12466 |
|               |             |                 |        | 159         | → | 161 | 0.16206  |
|               |             |                 |        | 159         | → | 163 | 0.42057  |
|               |             |                 |        | 160         | → | 161 | 0.12266  |
|               |             |                 |        | 160         | → | 163 | 0.11115  |
| 7             | 2.4012      | 516.35          | 0.0172 | 158         | → | 161 | -0.35088 |

|    |        |        |        |     |   |     |          |
|----|--------|--------|--------|-----|---|-----|----------|
|    |        |        |        | 158 | → | 162 | 0.40927  |
|    |        |        |        | 158 | → | 163 | -0.32398 |
|    |        |        |        | 159 | → | 162 | 0.10428  |
|    |        |        |        | 159 | → | 163 | 0.25686  |
|    |        |        |        | 160 | → | 163 | 0.1133   |
| 8  | 2.4887 | 498.19 | 0.0507 | 158 | → | 161 | 0.16216  |
|    |        |        |        | 158 | → | 162 | 0.51664  |
|    |        |        |        | 158 | → | 163 | 0.41489  |
|    |        |        |        | 159 | → | 161 | -0.1003  |
| 9  | 2.6729 | 463.85 | 0.0209 | 158 | → | 161 | -0.23608 |
|    |        |        |        | 158 | → | 162 | -0.17502 |
|    |        |        |        | 158 | → | 163 | 0.41739  |
|    |        |        |        | 159 | → | 163 | 0.33632  |
|    |        |        |        | 160 | → | 163 | 0.25745  |
| 10 | 3.0187 | 410.71 | 0.0046 | 157 | → | 161 | 0.60107  |
|    |        |        |        | 157 | → | 162 | -0.33389 |
| 11 | 3.1017 | 399.73 | 0.0039 | 157 | → | 162 | 0.11392  |
|    |        |        |        | 160 | → | 164 | 0.67884  |
| 12 | 3.1264 | 396.57 | 0.0158 | 157 | → | 161 | 0.34012  |
|    |        |        |        | 157 | → | 162 | 0.59993  |
| 13 | 3.2438 | 382.22 | 0.1292 | 156 | → | 161 | 0.10392  |
|    |        |        |        | 156 | → | 162 | -0.10187 |
|    |        |        |        | 157 | → | 163 | 0.60144  |
|    |        |        |        | 160 | → | 165 | 0.28     |
| 14 | 3.2501 | 381.48 | 0.0369 | 156 | → | 162 | 0.13852  |
|    |        |        |        | 157 | → | 163 | -0.24744 |
|    |        |        |        | 159 | → | 164 | -0.10608 |
|    |        |        |        | 160 | → | 165 | 0.60435  |
| 15 | 3.2706 | 379.09 | 0.0785 | 155 | → | 161 | -0.16167 |
|    |        |        |        | 155 | → | 162 | -0.15264 |
|    |        |        |        | 156 | → | 161 | 0.61138  |
|    |        |        |        | 156 | → | 162 | 0.23077  |
| 16 | 3.2968 | 376.08 | 0.0009 | 156 | → | 161 | -0.20262 |
|    |        |        |        | 156 | → | 162 | 0.2619   |
|    |        |        |        | 157 | → | 163 | 0.21273  |
|    |        |        |        | 159 | → | 164 | -0.38807 |
|    |        |        |        | 160 | → | 165 | -0.10073 |
|    |        |        |        | 160 | → | 166 | 0.40336  |
| 17 | 3.3157 | 373.94 | 0.0362 | 155 | → | 161 | -0.16396 |
|    |        |        |        | 156 | → | 161 | -0.19506 |
|    |        |        |        | 156 | → | 162 | 0.5149   |
|    |        |        |        | 157 | → | 163 | 0.11492  |
|    |        |        |        | 159 | → | 164 | 0.26899  |
|    |        |        |        | 160 | → | 166 | -0.26786 |
| 18 | 3.3292 | 372.41 | 0.0046 | 159 | → | 164 | 0.49636  |
|    |        |        |        | 160 | → | 166 | 0.47746  |

|    |        |        |        |     |   |     |          |
|----|--------|--------|--------|-----|---|-----|----------|
| 19 | 3.4015 | 364.49 | 0.0114 | 155 | → | 161 | 0.58536  |
|    |        |        |        | 155 | → | 162 | -0.31501 |
|    |        |        |        | 156 | → | 162 | 0.20017  |
| 20 | 3.4504 | 359.34 | 0.0059 | 155 | → | 161 | 0.2241   |
|    |        |        |        | 155 | → | 162 | 0.52343  |
|    |        |        |        | 156 | → | 161 | 0.14608  |
|    |        |        |        | 156 | → | 162 | 0.16306  |
|    |        |        |        | 156 | → | 163 | 0.14022  |
|    |        |        |        | 159 | → | 165 | 0.26165  |
| 21 | 3.4755 | 356.73 | 0.0029 | 155 | → | 161 | -0.12038 |
|    |        |        |        | 155 | → | 162 | -0.24679 |
|    |        |        |        | 159 | → | 165 | 0.54908  |
|    |        |        |        | 159 | → | 166 | -0.19876 |
|    |        |        |        | 159 | → | 174 | -0.12134 |
|    |        |        |        | 160 | → | 169 | 0.10871  |
|    |        |        |        | 160 | → | 169 | 0.10871  |
| 22 | 3.5316 | 351.07 | 0.0059 | 155 | → | 162 | -0.12695 |
|    |        |        |        | 156 | → | 163 | 0.37589  |
|    |        |        |        | 158 | → | 164 | -0.23135 |
|    |        |        |        | 159 | → | 165 | 0.10526  |
|    |        |        |        | 159 | → | 166 | 0.49569  |
| 23 | 3.5341 | 350.82 | 0.007  | 155 | → | 163 | 0.18114  |
|    |        |        |        | 156 | → | 163 | 0.52556  |
|    |        |        |        | 158 | → | 164 | 0.27153  |
|    |        |        |        | 159 | → | 165 | -0.12725 |
|    |        |        |        | 159 | → | 166 | -0.24627 |
|    |        |        |        | 159 | → | 166 | -0.24627 |
| 24 | 3.5498 | 349.27 | 0.0044 | 156 | → | 163 | -0.14461 |
|    |        |        |        | 158 | → | 164 | 0.53085  |
|    |        |        |        | 159 | → | 165 | 0.13776  |
|    |        |        |        | 159 | → | 166 | 0.35559  |
|    |        |        |        | 160 | → | 167 | -0.11758 |
|    |        |        |        | 160 | → | 167 | -0.11758 |
| 25 | 3.588  | 345.55 | 0.0006 | 155 | → | 163 | -0.14997 |
|    |        |        |        | 158 | → | 164 | 0.25578  |
|    |        |        |        | 160 | → | 165 | 0.13241  |
|    |        |        |        | 160 | → | 167 | 0.46115  |
|    |        |        |        | 160 | → | 168 | 0.20609  |
|    |        |        |        | 160 | → | 169 | -0.21944 |
|    |        |        |        | 160 | → | 174 | 0.17645  |
| 26 | 3.6379 | 340.81 | 0.0063 | 155 | → | 163 | 0.60403  |
|    |        |        |        | 156 | → | 163 | -0.14371 |
|    |        |        |        | 160 | → | 167 | 0.29728  |
| 27 | 3.6655 | 338.25 | 0.0108 | 155 | → | 163 | 0.19543  |
|    |        |        |        | 158 | → | 165 | -0.23476 |
|    |        |        |        | 158 | → | 174 | 0.10175  |
|    |        |        |        | 160 | → | 167 | -0.3048  |
|    |        |        |        | 160 | → | 168 | 0.49086  |
| 28 | 3.6899 | 336.01 | 0.0137 | 155 | → | 163 | -0.10414 |

|    |        |        |        |     |   |     |          |
|----|--------|--------|--------|-----|---|-----|----------|
|    |        |        |        | 158 | → | 165 | 0.3777   |
|    |        |        |        | 158 | → | 174 | -0.16433 |
|    |        |        |        | 160 | → | 168 | 0.41644  |
|    |        |        |        | 160 | → | 169 | 0.20868  |
| 29 | 3.7222 | 333.09 | 0.0272 | 158 | → | 165 | 0.32698  |
|    |        |        |        | 159 | → | 165 | 0.20587  |
|    |        |        |        | 159 | → | 167 | 0.22333  |
|    |        |        |        | 159 | → | 168 | 0.11954  |
|    |        |        |        | 159 | → | 169 | -0.2776  |
|    |        |        |        | 159 | → | 174 | 0.23451  |
|    |        |        |        | 159 | → | 175 | 0.11621  |
|    |        |        |        | 160 | → | 169 | -0.22822 |
| 30 | 3.7848 | 327.58 | 0.0014 | 158 | → | 165 | 0.1517   |
|    |        |        |        | 158 | → | 166 | 0.46637  |
|    |        |        |        | 159 | → | 168 | -0.1118  |
|    |        |        |        | 159 | → | 169 | 0.18271  |
|    |        |        |        | 159 | → | 174 | -0.20582 |
|    |        |        |        | 160 | → | 169 | -0.31479 |
| 31 | 3.7913 | 327.03 | 0.0052 | 154 | → | 161 | 0.60292  |
|    |        |        |        | 154 | → | 162 | -0.34179 |
| 32 | 3.8008 | 326.2  | 0.0175 | 158 | → | 165 | -0.13917 |
|    |        |        |        | 158 | → | 166 | 0.505    |
|    |        |        |        | 159 | → | 168 | 0.12462  |
|    |        |        |        | 159 | → | 169 | -0.15701 |
|    |        |        |        | 159 | → | 174 | 0.18878  |
|    |        |        |        | 160 | → | 167 | 0.10051  |
|    |        |        |        | 160 | → | 169 | 0.2797   |
| 33 | 3.874  | 320.04 | 0.0272 | 158 | → | 165 | -0.10332 |
|    |        |        |        | 159 | → | 167 | 0.59139  |
|    |        |        |        | 159 | → | 168 | 0.10838  |
|    |        |        |        | 159 | → | 169 | 0.20237  |
|    |        |        |        | 160 | → | 169 | 0.119    |
| 34 | 3.8976 | 318.1  | 0.0032 | 158 | → | 165 | 0.32845  |
|    |        |        |        | 158 | → | 167 | 0.17774  |
|    |        |        |        | 158 | → | 168 | 0.1055   |
|    |        |        |        | 158 | → | 169 | -0.26546 |
|    |        |        |        | 158 | → | 172 | 0.13753  |
|    |        |        |        | 158 | → | 174 | 0.392    |
|    |        |        |        | 160 | → | 169 | 0.18461  |
|    |        |        |        | 160 | → | 174 | 0.10747  |
| 35 | 3.9103 | 317.07 | 0.0056 | 154 | → | 161 | 0.2841   |
|    |        |        |        | 154 | → | 162 | 0.46634  |
|    |        |        |        | 159 | → | 167 | 0.18175  |
|    |        |        |        | 159 | → | 168 | -0.34691 |
| 36 | 3.922  | 316.12 | 0.0127 | 154 | → | 161 | 0.15322  |
|    |        |        |        | 154 | → | 162 | 0.36675  |

|    |        |        |        |     |   |     |          |
|----|--------|--------|--------|-----|---|-----|----------|
|    |        |        |        | 159 | → | 168 | 0.53938  |
| 37 | 3.9712 | 312.21 | 0.0012 | 158 | → | 175 | -0.13643 |
|    |        |        |        | 160 | → | 167 | 0.11601  |
|    |        |        |        | 160 | → | 169 | -0.10681 |
|    |        |        |        | 160 | → | 174 | -0.28979 |
|    |        |        |        | 160 | → | 175 | 0.38255  |
|    |        |        |        | 160 | → | 177 | 0.17553  |
|    |        |        |        | 160 | → | 178 | 0.26876  |
| 38 | 4.0333 | 307.4  | 0.0004 | 154 | → | 163 | 0.68149  |
| 39 | 4.1089 | 301.74 | 0.0098 | 157 | → | 164 | -0.23374 |
|    |        |        |        | 157 | → | 166 | 0.13383  |
|    |        |        |        | 158 | → | 167 | 0.56334  |
|    |        |        |        | 158 | → | 168 | -0.16393 |
|    |        |        |        | 158 | → | 169 | 0.12566  |
|    |        |        |        | 158 | → | 174 | -0.12546 |
| 40 | 4.1378 | 299.64 | 0.0015 | 157 | → | 164 | 0.4839   |
|    |        |        |        | 157 | → | 166 | -0.28471 |
|    |        |        |        | 158 | → | 167 | 0.27653  |
|    |        |        |        | 158 | → | 168 | -0.14195 |

**Table S15.** TDDFT calculated transitions for *fac*-[Ru(Q1Pz)<sub>3</sub>]<sup>2+</sup>.

| Excited State | Energy (eV) | Wavelength (nm) | f      | Transitions |   |     |          |
|---------------|-------------|-----------------|--------|-------------|---|-----|----------|
| 1             | 2.6579      | 466.47          | 0.0397 | 160         | → | 161 | 0.61016  |
|               |             |                 |        | 160         | → | 162 | 0.30257  |
|               |             |                 |        | 160         | → | 163 | -0.11447 |
| 2             | 2.7384      | 452.76          | 0.057  | 160         | → | 161 | -0.27803 |
|               |             |                 |        | 160         | → | 162 | 0.61761  |
|               |             |                 |        | 160         | → | 163 | 0.14906  |
| 3             | 2.7957      | 443.48          | 0.0195 | 159         | → | 161 | -0.44303 |
|               |             |                 |        | 159         | → | 163 | 0.14653  |
|               |             |                 |        | 160         | → | 161 | 0.17672  |
|               |             |                 |        | 160         | → | 163 | 0.47806  |
| 4             | 2.8713      | 431.8           | 0.0365 | 159         | → | 161 | 0.49076  |
|               |             |                 |        | 159         | → | 162 | 0.19132  |
|               |             |                 |        | 159         | → | 163 | 0.29721  |
|               |             |                 |        | 160         | → | 162 | -0.10441 |
|               |             |                 |        | 160         | → | 163 | 0.30856  |
|               |             |                 |        | 160         | → | 163 | 0.50451  |
| 5             | 2.8843      | 429.85          | 0.0144 | 159         | → | 163 | -0.4586  |
|               |             |                 |        | 160         | → | 163 | 0.12661  |
|               |             |                 |        | 160         | → | 163 | 0.12661  |
| 6             | 2.9321      | 422.85          | 0.0125 | 158         | → | 162 | -0.22788 |
|               |             |                 |        | 159         | → | 161 | -0.19492 |
|               |             |                 |        | 159         | → | 162 | 0.42159  |
|               |             |                 |        | 159         | → | 163 | 0.36902  |
|               |             |                 |        | 160         | → | 163 | -0.26509 |
| 7             | 3.0549      | 405.85          | 0.013  | 158         | → | 161 | 0.64756  |



|    |        |        |        |     |   |     |          |
|----|--------|--------|--------|-----|---|-----|----------|
|    |        |        |        | 158 | → | 162 | -0.10007 |
|    |        |        |        | 158 | → | 163 | 0.21463  |
| 8  | 3.1478 | 393.88 | 0.1004 | 158 | → | 161 | -0.18567 |
|    |        |        |        | 158 | → | 162 | 0.13484  |
|    |        |        |        | 158 | → | 163 | 0.6397   |
| 9  | 3.1991 | 387.56 | 0.0323 | 158 | → | 161 | 0.10724  |
|    |        |        |        | 158 | → | 162 | 0.61772  |
|    |        |        |        | 159 | → | 163 | 0.10759  |
|    |        |        |        | 160 | → | 163 | -0.17095 |
| 10 | 3.6405 | 340.57 | 0.0006 | 159 | → | 170 | 0.12994  |
|    |        |        |        | 159 | → | 175 | -0.10693 |
|    |        |        |        | 160 | → | 164 | 0.31012  |
|    |        |        |        | 160 | → | 165 | 0.10986  |
|    |        |        |        | 160 | → | 166 | 0.15838  |
|    |        |        |        | 160 | → | 167 | 0.23609  |
|    |        |        |        | 160 | → | 168 | -0.15146 |
|    |        |        |        | 160 | → | 170 | 0.19329  |
|    |        |        |        | 160 | → | 171 | 0.19798  |
|    |        |        |        | 160 | → | 174 | 0.23589  |
|    |        |        |        | 160 | → | 175 | -0.15015 |
| 11 | 3.7125 | 333.97 | 0.0073 | 158 | → | 170 | -0.13728 |
|    |        |        |        | 158 | → | 175 | 0.11155  |
|    |        |        |        | 159 | → | 165 | -0.13656 |
|    |        |        |        | 159 | → | 167 | 0.15968  |
|    |        |        |        | 159 | → | 168 | -0.12698 |
|    |        |        |        | 159 | → | 170 | 0.2866   |
|    |        |        |        | 159 | → | 175 | -0.2097  |
|    |        |        |        | 160 | → | 165 | 0.22492  |
|    |        |        |        | 160 | → | 167 | -0.11417 |
|    |        |        |        | 160 | → | 169 | 0.10522  |
|    |        |        |        | 160 | → | 170 | -0.16919 |
|    |        |        |        | 160 | → | 171 | 0.12447  |
|    |        |        |        | 160 | → | 174 | 0.12034  |
|    |        |        |        | 160 | → | 175 | 0.12094  |
| 12 | 3.7815 | 327.87 | 0.0039 | 158 | → | 171 | -0.15949 |
|    |        |        |        | 158 | → | 174 | -0.17568 |
|    |        |        |        | 159 | → | 164 | -0.15754 |
|    |        |        |        | 159 | → | 167 | -0.18447 |
|    |        |        |        | 159 | → | 168 | 0.10074  |
|    |        |        |        | 159 | → | 170 | -0.22837 |
|    |        |        |        | 159 | → | 175 | 0.16815  |
|    |        |        |        | 160 | → | 164 | 0.1593   |
|    |        |        |        | 160 | → | 165 | 0.32465  |
|    |        |        |        | 160 | → | 170 | -0.14442 |
|    |        |        |        | 160 | → | 171 | 0.11234  |
|    |        |        |        | 160 | → | 174 | 0.12203  |

|    |        |        |        |     |   |     |          |
|----|--------|--------|--------|-----|---|-----|----------|
| 13 | 3.8194 | 324.61 | 0.0691 | 160 | → | 175 | 0.10266  |
|    |        |        |        | 155 | → | 161 | 0.14179  |
|    |        |        |        | 156 | → | 161 | 0.10239  |
|    |        |        |        | 157 | → | 161 | 0.64399  |
| 14 | 3.8655 | 320.75 | 0.0507 | 160 | → | 164 | 0.10168  |
|    |        |        |        | 155 | → | 161 | -0.16224 |
|    |        |        |        | 156 | → | 161 | 0.39733  |
|    |        |        |        | 156 | → | 162 | 0.2017   |
|    |        |        |        | 156 | → | 163 | -0.21445 |
|    |        |        |        | 157 | → | 162 | 0.2549   |
| 15 | 3.8933 | 318.45 | 0.0215 | 157 | → | 163 | -0.26084 |
|    |        |        |        | 159 | → | 165 | -0.10184 |
|    |        |        |        | 160 | → | 166 | -0.15562 |
|    |        |        |        | 156 | → | 161 | -0.22883 |
| 16 | 3.9137 | 316.8  | 0.0305 | 160 | → | 164 | 0.46698  |
|    |        |        |        | 160 | → | 165 | -0.31117 |
|    |        |        |        | 160 | → | 166 | -0.18795 |
|    |        |        |        | 155 | → | 161 | 0.14085  |
|    |        |        |        | 155 | → | 163 | -0.18871 |
|    |        |        |        | 156 | → | 161 | -0.16672 |
| 17 | 3.9306 | 315.43 | 0.061  | 156 | → | 162 | -0.21881 |
|    |        |        |        | 157 | → | 162 | 0.48096  |
|    |        |        |        | 157 | → | 163 | -0.26699 |
|    |        |        |        | 160 | → | 166 | 0.15219  |
|    |        |        |        | 155 | → | 162 | -0.21659 |
|    |        |        |        | 156 | → | 162 | -0.32725 |
|    |        |        |        | 156 | → | 163 | -0.1027  |
|    |        |        |        | 157 | → | 162 | 0.17639  |
|    |        |        |        | 157 | → | 163 | 0.35887  |
|    |        |        |        | 160 | → | 164 | -0.16801 |
| 18 | 3.9451 | 314.28 | 0.0867 | 160 | → | 165 | -0.12275 |
|    |        |        |        | 160 | → | 166 | -0.20037 |
|    |        |        |        | 160 | → | 167 | 0.10632  |
|    |        |        |        | 155 | → | 162 | -0.16706 |
|    |        |        |        | 156 | → | 161 | 0.18878  |
|    |        |        |        | 156 | → | 163 | -0.12638 |
|    |        |        |        | 157 | → | 163 | 0.2715   |
|    |        |        |        | 160 | → | 164 | 0.22041  |
|    |        |        |        | 160 | → | 165 | 0.1454   |
|    |        |        |        | 160 | → | 166 | 0.32426  |
| 19 | 4.012  | 309.03 | 0.0038 | 160 | → | 167 | -0.14347 |
|    |        |        |        | 160 | → | 169 | -0.11716 |
|    |        |        |        | 160 | → | 171 | -0.15095 |
|    |        |        |        | 160 | → | 174 | -0.13645 |
|    |        |        |        | 156 | → | 161 | 0.19883  |
|    |        |        |        | 156 | → | 162 | -0.20777 |

|    |        |        |        |     |   |     |          |
|----|--------|--------|--------|-----|---|-----|----------|
|    |        |        |        | 158 | → | 170 | 0.10578  |
|    |        |        |        | 159 | → | 164 | 0.3496   |
|    |        |        |        | 159 | → | 165 | 0.1504   |
|    |        |        |        | 159 | → | 171 | 0.116    |
|    |        |        |        | 159 | → | 174 | 0.11325  |
|    |        |        |        | 160 | → | 164 | 0.15217  |
|    |        |        |        | 160 | → | 166 | -0.14431 |
|    |        |        |        | 160 | → | 167 | -0.25379 |
|    |        |        |        | 160 | → | 168 | 0.17474  |
| 20 | 4.0228 | 308.2  | 0.0061 | 156 | → | 161 | 0.11915  |
|    |        |        |        | 156 | → | 162 | -0.18645 |
|    |        |        |        | 157 | → | 162 | -0.14396 |
|    |        |        |        | 157 | → | 163 | -0.11728 |
|    |        |        |        | 158 | → | 167 | -0.10917 |
|    |        |        |        | 158 | → | 171 | -0.12178 |
|    |        |        |        | 158 | → | 174 | -0.13276 |
|    |        |        |        | 160 | → | 165 | -0.35956 |
|    |        |        |        | 160 | → | 166 | 0.36219  |
|    |        |        |        | 160 | → | 171 | 0.11189  |
|    |        |        |        | 160 | → | 174 | 0.10127  |
| 21 | 4.0378 | 307.06 | 0.0179 | 155 | → | 161 | 0.13012  |
|    |        |        |        | 155 | → | 162 | 0.11833  |
|    |        |        |        | 156 | → | 161 | 0.29954  |
|    |        |        |        | 156 | → | 162 | -0.27679 |
|    |        |        |        | 156 | → | 163 | 0.32809  |
|    |        |        |        | 157 | → | 162 | -0.11558 |
|    |        |        |        | 159 | → | 164 | -0.22884 |
|    |        |        |        | 159 | → | 165 | -0.16937 |
| 22 | 4.0738 | 304.35 | 0.0104 | 155 | → | 161 | 0.267    |
|    |        |        |        | 156 | → | 161 | 0.14501  |
|    |        |        |        | 156 | → | 162 | 0.3001   |
|    |        |        |        | 156 | → | 163 | 0.34353  |
|    |        |        |        | 157 | → | 161 | -0.12349 |
|    |        |        |        | 157 | → | 162 | 0.182    |
|    |        |        |        | 157 | → | 163 | 0.14414  |
|    |        |        |        | 159 | → | 165 | 0.19987  |
| 23 | 4.1003 | 302.37 | 0.0099 | 156 | → | 163 | 0.2324   |
|    |        |        |        | 157 | → | 162 | 0.12518  |
|    |        |        |        | 158 | → | 164 | -0.1031  |
|    |        |        |        | 159 | → | 164 | 0.39534  |
|    |        |        |        | 159 | → | 165 | -0.20303 |
|    |        |        |        | 159 | → | 166 | -0.29856 |
|    |        |        |        | 159 | → | 170 | -0.12038 |
|    |        |        |        | 160 | → | 167 | 0.2086   |
| 24 | 4.1201 | 300.93 | 0.0056 | 155 | → | 161 | 0.47553  |
|    |        |        |        | 155 | → | 162 | -0.11118 |

|    |        |        |        |     |   |     |          |
|----|--------|--------|--------|-----|---|-----|----------|
|    |        |        |        | 155 | → | 163 | 0.1551   |
|    |        |        |        | 156 | → | 163 | -0.22957 |
|    |        |        |        | 157 | → | 162 | -0.11138 |
|    |        |        |        | 157 | → | 163 | -0.12075 |
|    |        |        |        | 158 | → | 167 | -0.10747 |
|    |        |        |        | 158 | → | 170 | -0.1145  |
|    |        |        |        | 160 | → | 166 | -0.11697 |
|    |        |        |        | 160 | → | 167 | 0.19301  |
| 25 | 4.1238 | 300.66 | 0.0024 | 155 | → | 161 | -0.2627  |
|    |        |        |        | 156 | → | 162 | -0.11904 |
|    |        |        |        | 156 | → | 163 | 0.17602  |
|    |        |        |        | 158 | → | 164 | -0.19788 |
|    |        |        |        | 158 | → | 167 | -0.15919 |
|    |        |        |        | 158 | → | 170 | -0.13402 |
|    |        |        |        | 159 | → | 164 | 0.10877  |
|    |        |        |        | 159 | → | 165 | 0.27142  |
|    |        |        |        | 159 | → | 166 | 0.2278   |
|    |        |        |        | 160 | → | 166 | -0.15361 |
|    |        |        |        | 160 | → | 168 | -0.22911 |
|    |        |        |        | 160 | → | 169 | -0.12036 |
| 26 | 4.1738 | 297.06 | 0.0087 | 155 | → | 162 | -0.30734 |
|    |        |        |        | 156 | → | 163 | 0.10397  |
|    |        |        |        | 157 | → | 163 | -0.15765 |
|    |        |        |        | 159 | → | 164 | 0.15332  |
|    |        |        |        | 159 | → | 165 | -0.19345 |
|    |        |        |        | 159 | → | 166 | 0.36711  |
|    |        |        |        | 159 | → | 167 | -0.20836 |
|    |        |        |        | 160 | → | 166 | 0.12049  |
|    |        |        |        | 160 | → | 168 | 0.18647  |
| 27 | 4.177  | 296.82 | 0.004  | 155 | → | 162 | 0.50264  |
|    |        |        |        | 157 | → | 162 | 0.12314  |
|    |        |        |        | 157 | → | 163 | 0.18288  |
|    |        |        |        | 159 | → | 164 | 0.13098  |
|    |        |        |        | 159 | → | 166 | 0.29552  |
|    |        |        |        | 159 | → | 167 | -0.19889 |
|    |        |        |        | 160 | → | 167 | 0.10888  |
| 28 | 4.1869 | 296.13 | 0.0031 | 155 | → | 161 | -0.10973 |
|    |        |        |        | 155 | → | 163 | 0.142    |
|    |        |        |        | 158 | → | 165 | 0.20304  |
|    |        |        |        | 158 | → | 171 | 0.10502  |
|    |        |        |        | 159 | → | 165 | 0.21311  |
|    |        |        |        | 160 | → | 167 | 0.26921  |
|    |        |        |        | 160 | → | 168 | 0.33877  |
|    |        |        |        | 160 | → | 169 | 0.27267  |
| 29 | 4.2124 | 294.33 | 0.0062 | 155 | → | 163 | 0.43768  |
|    |        |        |        | 157 | → | 162 | 0.13864  |

|    |        |        |        |     |   |     |          |
|----|--------|--------|--------|-----|---|-----|----------|
|    |        |        |        | 158 | → | 164 | -0.29281 |
|    |        |        |        | 159 | → | 164 | -0.12724 |
|    |        |        |        | 159 | → | 165 | -0.19744 |
|    |        |        |        | 160 | → | 167 | -0.14056 |
| 30 | 4.2233 | 293.57 | 0.0006 | 155 | → | 163 | -0.31126 |
|    |        |        |        | 158 | → | 164 | -0.31093 |
|    |        |        |        | 158 | → | 165 | 0.13952  |
|    |        |        |        | 158 | → | 166 | 0.16237  |
|    |        |        |        | 158 | → | 167 | -0.11563 |
|    |        |        |        | 159 | → | 165 | -0.11342 |
|    |        |        |        | 160 | → | 167 | -0.10788 |
|    |        |        |        | 160 | → | 169 | 0.34358  |
|    |        |        |        | 160 | → | 170 | 0.12714  |
| 31 | 4.2471 | 291.93 | 0.0071 | 154 | → | 163 | -0.10958 |
|    |        |        |        | 155 | → | 163 | 0.29804  |
|    |        |        |        | 158 | → | 164 | 0.19017  |
|    |        |        |        | 159 | → | 164 | 0.10682  |
|    |        |        |        | 159 | → | 167 | -0.10519 |
|    |        |        |        | 159 | → | 169 | -0.10876 |
|    |        |        |        | 160 | → | 168 | -0.28634 |
|    |        |        |        | 160 | → | 169 | 0.3897   |
| 32 | 4.3008 | 288.28 | 0.0126 | 154 | → | 161 | -0.10948 |
|    |        |        |        | 158 | → | 165 | 0.49328  |
|    |        |        |        | 158 | → | 166 | 0.11516  |
|    |        |        |        | 159 | → | 165 | 0.10822  |
|    |        |        |        | 159 | → | 167 | -0.20375 |
|    |        |        |        | 160 | → | 168 | -0.17255 |
|    |        |        |        | 160 | → | 169 | -0.12116 |
|    |        |        |        | 160 | → | 170 | -0.10509 |
|    |        |        |        | 160 | → | 171 | 0.14525  |
|    |        |        |        | 160 | → | 174 | 0.13249  |
| 33 | 4.3386 | 285.77 | 0.0202 | 158 | → | 164 | 0.12344  |
|    |        |        |        | 158 | → | 166 | -0.14076 |
|    |        |        |        | 158 | → | 169 | 0.10246  |
|    |        |        |        | 159 | → | 165 | -0.19143 |
|    |        |        |        | 159 | → | 166 | 0.20199  |
|    |        |        |        | 159 | → | 167 | 0.17886  |
|    |        |        |        | 159 | → | 168 | 0.30096  |
|    |        |        |        | 159 | → | 169 | 0.32839  |
|    |        |        |        | 159 | → | 171 | 0.10809  |
|    |        |        |        | 160 | → | 170 | -0.17793 |
| 34 | 4.3549 | 284.7  | 0.0103 | 153 | → | 162 | -0.11232 |
|    |        |        |        | 154 | → | 161 | 0.1134   |
|    |        |        |        | 158 | → | 164 | 0.18997  |
|    |        |        |        | 158 | → | 166 | 0.50654  |
|    |        |        |        | 158 | → | 167 | -0.19821 |

|    |        |        |        |     |   |     |          |
|----|--------|--------|--------|-----|---|-----|----------|
|    |        |        |        | 158 | → | 168 | -0.11927 |
|    |        |        |        | 159 | → | 167 | 0.20428  |
|    |        |        |        | 159 | → | 168 | 0.11067  |
| 35 | 4.4099 | 281.15 | 0.0028 | 158 | → | 164 | 0.16942  |
|    |        |        |        | 158 | → | 165 | 0.23257  |
|    |        |        |        | 158 | → | 166 | -0.25886 |
|    |        |        |        | 158 | → | 169 | -0.14261 |
|    |        |        |        | 158 | → | 171 | -0.10102 |
|    |        |        |        | 159 | → | 166 | 0.15795  |
|    |        |        |        | 159 | → | 167 | 0.27196  |
|    |        |        |        | 159 | → | 169 | -0.19497 |
|    |        |        |        | 159 | → | 170 | -0.16783 |
|    |        |        |        | 160 | → | 170 | 0.20597  |
|    |        |        |        | 160 | → | 175 | -0.10372 |
| 36 | 4.4177 | 280.65 | 0.0113 | 158 | → | 164 | -0.19568 |
|    |        |        |        | 158 | → | 167 | 0.37166  |
|    |        |        |        | 158 | → | 168 | -0.12875 |
|    |        |        |        | 158 | → | 169 | -0.10079 |
|    |        |        |        | 159 | → | 165 | 0.16571  |
|    |        |        |        | 159 | → | 167 | 0.25906  |
|    |        |        |        | 159 | → | 169 | -0.10897 |
|    |        |        |        | 160 | → | 167 | 0.16266  |
|    |        |        |        | 160 | → | 168 | -0.11807 |
|    |        |        |        | 160 | → | 169 | 0.11246  |
|    |        |        |        | 160 | → | 170 | -0.1913  |
|    |        |        |        | 160 | → | 171 | -0.11034 |
|    |        |        |        | 160 | → | 175 | 0.11297  |
| 37 | 4.4467 | 278.82 | 0.0389 | 154 | → | 161 | -0.12169 |
|    |        |        |        | 158 | → | 164 | 0.14658  |
|    |        |        |        | 158 | → | 168 | -0.10116 |
|    |        |        |        | 158 | → | 169 | -0.2178  |
|    |        |        |        | 158 | → | 171 | -0.14731 |
|    |        |        |        | 158 | → | 174 | -0.12854 |
|    |        |        |        | 159 | → | 168 | -0.25353 |
|    |        |        |        | 159 | → | 169 | 0.44419  |
|    |        |        |        | 160 | → | 171 | -0.14949 |
|    |        |        |        | 160 | → | 174 | -0.12471 |
| 38 | 4.5049 | 275.22 | 0.0215 | 154 | → | 161 | 0.13419  |
|    |        |        |        | 158 | → | 166 | -0.12615 |
|    |        |        |        | 158 | → | 168 | -0.23755 |
|    |        |        |        | 159 | → | 168 | 0.41132  |
|    |        |        |        | 159 | → | 170 | 0.20792  |
|    |        |        |        | 159 | → | 171 | -0.14328 |
|    |        |        |        | 159 | → | 174 | -0.12893 |
|    |        |        |        | 160 | → | 170 | 0.15502  |
| 39 | 4.5365 | 273.31 | 0.0094 | 153 | → | 162 | -0.1185  |

|    |        |        |        |     |   |     |          |
|----|--------|--------|--------|-----|---|-----|----------|
|    |        |        |        | 153 | → | 163 | -0.10032 |
|    |        |        |        | 154 | → | 161 | -0.20885 |
|    |        |        |        | 158 | → | 167 | 0.17287  |
|    |        |        |        | 158 | → | 168 | 0.32773  |
|    |        |        |        | 159 | → | 168 | 0.18064  |
|    |        |        |        | 159 | → | 171 | -0.23452 |
|    |        |        |        | 159 | → | 174 | -0.18883 |
|    |        |        |        | 160 | → | 167 | -0.11943 |
|    |        |        |        | 160 | → | 170 | 0.17333  |
| 40 | 4.5551 | 272.19 | 0.0212 | 152 | → | 161 | 0.18764  |
|    |        |        |        | 152 | → | 163 | 0.11388  |
|    |        |        |        | 154 | → | 161 | 0.31825  |
|    |        |        |        | 154 | → | 162 | -0.14142 |
|    |        |        |        | 154 | → | 163 | 0.19737  |
|    |        |        |        | 155 | → | 164 | 0.12767  |
|    |        |        |        | 157 | → | 164 | 0.27488  |
|    |        |        |        | 157 | → | 166 | 0.15675  |
|    |        |        |        | 158 | → | 167 | 0.12311  |
|    |        |        |        | 158 | → | 168 | 0.12356  |
|    |        |        |        | 159 | → | 168 | -0.10598 |
|    |        |        |        | 159 | → | 169 | 0.13691  |
|    |        |        |        | 160 | → | 168 | -0.10528 |

**Table S16.** TDDFT calculated transitions for *mer*-[Ru(Q1Pz)<sub>3</sub>]<sup>2+</sup>.

| Excited State | Energy (eV) | Wavelength (nm) | f      | Transitions |   |     |          |
|---------------|-------------|-----------------|--------|-------------|---|-----|----------|
| 1             | 2.7322      | 453.8           | 0.1456 | 159         | → | 161 | 0.12057  |
|               |             |                 |        | 160         | → | 161 | 0.68977  |
| 2             | 2.758       | 449.54          | 0.0186 | 160         | → | 162 | 0.69195  |
| 3             | 2.8662      | 432.57          | 0.0369 | 159         | → | 161 | 0.6602   |
|               |             |                 |        | 160         | → | 161 | -0.11424 |
|               |             |                 |        | 160         | → | 163 | 0.17636  |
| 4             | 2.9116      | 425.82          | 0.015  | 159         | → | 162 | 0.63799  |
|               |             |                 |        | 160         | → | 163 | 0.23489  |
| 5             | 2.9233      | 424.12          | 0.0077 | 158         | → | 161 | 0.1609   |
|               |             |                 |        | 158         | → | 162 | 0.17165  |
|               |             |                 |        | 159         | → | 161 | -0.16821 |
|               |             |                 |        | 159         | → | 162 | -0.14067 |
|               |             |                 |        | 159         | → | 163 | 0.36482  |
| 6             | 2.982       | 415.77          | 0.0139 | 160         | → | 163 | 0.48767  |
|               |             |                 |        | 158         | → | 161 | -0.23777 |
|               |             |                 |        | 158         | → | 162 | -0.11    |
|               |             |                 |        | 159         | → | 162 | 0.16003  |
|               |             |                 |        | 159         | → | 163 | 0.5676   |
| 7             | 3.017       | 410.95          | 0.0066 | 160         | → | 163 | -0.22435 |
|               |             |                 |        | 158         | → | 161 | 0.62115  |
|               |             |                 |        | 158         | → | 162 | -0.1452  |

|    |        |        |        |     |   |     |          |
|----|--------|--------|--------|-----|---|-----|----------|
|    |        |        |        | 158 | → | 163 | 0.17863  |
|    |        |        |        | 159 | → | 163 | 0.10099  |
|    |        |        |        | 160 | → | 163 | -0.1818  |
| 8  | 3.1107 | 398.58 | 0.0158 | 158 | → | 162 | 0.28322  |
|    |        |        |        | 158 | → | 163 | 0.61117  |
| 9  | 3.1874 | 388.98 | 0.0687 | 158 | → | 161 | 0.10392  |
|    |        |        |        | 158 | → | 162 | 0.57056  |
|    |        |        |        | 158 | → | 163 | -0.20743 |
|    |        |        |        | 159 | → | 162 | 0.1628   |
|    |        |        |        | 160 | → | 163 | -0.22748 |
| 10 | 3.5977 | 344.62 | 0.0049 | 159 | → | 170 | -0.10885 |
|    |        |        |        | 159 | → | 175 | -0.10609 |
|    |        |        |        | 160 | → | 165 | 0.3733   |
|    |        |        |        | 160 | → | 168 | -0.15303 |
|    |        |        |        | 160 | → | 169 | -0.21777 |
|    |        |        |        | 160 | → | 170 | 0.1672   |
|    |        |        |        | 160 | → | 171 | 0.24796  |
|    |        |        |        | 160 | → | 174 | -0.20542 |
|    |        |        |        | 160 | → | 175 | 0.16892  |
| 11 | 3.7011 | 334.99 | 0.0054 | 158 | → | 165 | -0.12632 |
|    |        |        |        | 158 | → | 170 | -0.14211 |
|    |        |        |        | 158 | → | 175 | -0.13268 |
|    |        |        |        | 159 | → | 170 | 0.12047  |
|    |        |        |        | 159 | → | 171 | -0.15677 |
|    |        |        |        | 159 | → | 174 | 0.14586  |
|    |        |        |        | 160 | → | 164 | -0.18189 |
|    |        |        |        | 160 | → | 166 | 0.28757  |
|    |        |        |        | 160 | → | 167 | 0.15902  |
|    |        |        |        | 160 | → | 170 | 0.23048  |
|    |        |        |        | 160 | → | 171 | -0.18635 |
|    |        |        |        | 160 | → | 174 | 0.17521  |
|    |        |        |        | 160 | → | 175 | 0.16218  |
| 12 | 3.7679 | 329.05 | 0.0063 | 157 | → | 161 | 0.66216  |
| 13 | 3.772  | 328.69 | 0.008  | 157 | → | 161 | 0.14856  |
|    |        |        |        | 158 | → | 165 | 0.12656  |
|    |        |        |        | 158 | → | 166 | -0.10319 |
|    |        |        |        | 158 | → | 171 | 0.22854  |
|    |        |        |        | 158 | → | 174 | -0.19689 |
|    |        |        |        | 159 | → | 164 | -0.10931 |
|    |        |        |        | 159 | → | 165 | 0.19693  |
|    |        |        |        | 159 | → | 167 | 0.14226  |
|    |        |        |        | 159 | → | 168 | -0.15234 |
|    |        |        |        | 159 | → | 170 | 0.31204  |
|    |        |        |        | 159 | → | 175 | 0.25258  |
| 14 | 3.82   | 324.57 | 0.0017 | 156 | → | 161 | -0.14381 |
|    |        |        |        | 160 | → | 164 | 0.56479  |



|    |        |        |        |     |   |     |          |
|----|--------|--------|--------|-----|---|-----|----------|
| 15 | 3.8893 | 318.78 | 0.2    | 160 | → | 166 | -0.17329 |
|    |        |        |        | 155 | → | 161 | -0.12863 |
|    |        |        |        | 156 | → | 161 | 0.47108  |
|    |        |        |        | 157 | → | 162 | 0.17905  |
| 16 | 3.9498 | 313.9  | 0.1198 | 157 | → | 163 | 0.38522  |
|    |        |        |        | 160 | → | 164 | 0.20959  |
|    |        |        |        | 155 | → | 162 | 0.20255  |
|    |        |        |        | 156 | → | 162 | 0.61127  |
| 17 | 3.9638 | 312.79 | 0.0111 | 157 | → | 162 | 0.21873  |
|    |        |        |        | 156 | → | 161 | -0.35834 |
|    |        |        |        | 156 | → | 162 | -0.16474 |
|    |        |        |        | 157 | → | 162 | 0.54616  |
| 18 | 3.9754 | 311.88 | 0.0144 | 157 | → | 163 | 0.14888  |
|    |        |        |        | 157 | → | 163 | -0.16138 |
|    |        |        |        | 158 | → | 165 | 0.15267  |
|    |        |        |        | 158 | → | 166 | -0.1186  |
|    |        |        |        | 158 | → | 171 | 0.20799  |
|    |        |        |        | 158 | → | 174 | -0.1686  |
|    |        |        |        | 159 | → | 164 | 0.11922  |
|    |        |        |        | 159 | → | 165 | -0.22741 |
|    |        |        |        | 159 | → | 166 | 0.10694  |
|    |        |        |        | 159 | → | 168 | 0.11172  |
|    |        |        |        | 159 | → | 171 | -0.1366  |
|    |        |        |        | 159 | → | 174 | 0.11795  |
| 19 | 3.9889 | 310.82 | 0.0169 | 160 | → | 165 | -0.25541 |
|    |        |        |        | 160 | → | 166 | 0.26571  |
|    |        |        |        | 160 | → | 168 | 0.12302  |
|    |        |        |        | 160 | → | 171 | 0.11389  |
|    |        |        |        | 156 | → | 162 | -0.10846 |
|    |        |        |        | 157 | → | 162 | 0.22163  |
|    |        |        |        | 157 | → | 163 | -0.25161 |
|    |        |        |        | 159 | → | 164 | 0.12505  |
| 20 | 4.0013 | 309.86 | 0.0128 | 159 | → | 165 | 0.11657  |
|    |        |        |        | 159 | → | 166 | -0.15813 |
|    |        |        |        | 159 | → | 171 | 0.11371  |
|    |        |        |        | 160 | → | 164 | 0.17265  |
|    |        |        |        | 160 | → | 165 | 0.2897   |
|    |        |        |        | 160 | → | 166 | 0.33154  |
|    |        |        |        | 155 | → | 161 | -0.1073  |
|    |        |        |        | 156 | → | 161 | -0.31458 |
|    |        |        |        | 156 | → | 162 | 0.14113  |
|    |        |        |        | 157 | → | 162 | -0.2259  |
|    |        |        |        | 157 | → | 163 | 0.38991  |
|    |        |        |        | 160 | → | 164 | 0.10494  |
|    |        |        |        | 160 | → | 165 | 0.17171  |
|    |        |        |        | 160 | → | 166 | 0.26569  |

|    |        |        |        |     |   |     |          |
|----|--------|--------|--------|-----|---|-----|----------|
| 21 | 4.0375 | 307.08 | 0.009  | 160 | → | 168 | 0.11113  |
|    |        |        |        | 157 | → | 163 | 0.11678  |
|    |        |        |        | 159 | → | 164 | 0.30105  |
|    |        |        |        | 159 | → | 165 | 0.17117  |
|    |        |        |        | 159 | → | 166 | -0.29989 |
|    |        |        |        | 159 | → | 167 | -0.13756 |
|    |        |        |        | 160 | → | 165 | -0.21725 |
|    |        |        |        | 160 | → | 167 | 0.23538  |
|    |        |        |        | 160 | → | 168 | -0.22481 |
|    |        |        |        | 160 | → | 170 | 0.1155   |
| 22 | 4.0674 | 304.82 | 0.0096 | 159 | → | 164 | 0.52045  |
|    |        |        |        | 160 | → | 165 | 0.13298  |
|    |        |        |        | 160 | → | 166 | -0.12973 |
|    |        |        |        | 160 | → | 167 | -0.29219 |
| 23 | 4.121  | 300.86 | 0.0139 | 160 | → | 168 | 0.13719  |
|    |        |        |        | 156 | → | 163 | 0.63677  |
|    |        |        |        | 157 | → | 161 | -0.10561 |
| 24 | 4.1327 | 300    | 0.0088 | 160 | → | 169 | -0.14414 |
|    |        |        |        | 158 | → | 164 | 0.38062  |
|    |        |        |        | 158 | → | 165 | -0.14701 |
|    |        |        |        | 158 | → | 166 | -0.1558  |
|    |        |        |        | 158 | → | 167 | -0.20859 |
|    |        |        |        | 158 | → | 168 | 0.11114  |
|    |        |        |        | 158 | → | 170 | -0.14073 |
|    |        |        |        | 159 | → | 164 | -0.17317 |
|    |        |        |        | 159 | → | 165 | 0.16708  |
|    |        |        |        | 159 | → | 166 | -0.14876 |
| 25 | 4.1406 | 299.43 | 0.0023 | 160 | → | 166 | 0.15293  |
|    |        |        |        | 160 | → | 167 | -0.23778 |
|    |        |        |        | 154 | → | 161 | 0.12266  |
|    |        |        |        | 154 | → | 163 | -0.1098  |
|    |        |        |        | 155 | → | 161 | -0.18126 |
|    |        |        |        | 156 | → | 163 | 0.1528   |
|    |        |        |        | 157 | → | 163 | -0.10328 |
|    |        |        |        | 158 | → | 166 | -0.14016 |
|    |        |        |        | 160 | → | 165 | 0.1239   |
|    |        |        |        | 160 | → | 166 | -0.17727 |
| 26 | 4.1599 | 298.05 | 0.0159 | 160 | → | 167 | 0.3497   |
|    |        |        |        | 160 | → | 168 | 0.3478   |
|    |        |        |        | 160 | → | 169 | 0.18947  |
|    |        |        |        | 155 | → | 161 | 0.63391  |
|    |        |        |        | 157 | → | 163 | 0.17318  |
| 27 | 4.1745 | 297    | 0.0054 | 160 | → | 167 | 0.12774  |
|    |        |        |        | 160 | → | 168 | 0.13269  |
|    |        |        |        | 156 | → | 163 | -0.13413 |
|    |        |        |        | 158 | → | 164 | 0.23095  |

|    |        |        |        |     |   |     |          |
|----|--------|--------|--------|-----|---|-----|----------|
|    |        |        |        | 158 | → | 166 | 0.10112  |
|    |        |        |        | 158 | → | 171 | -0.10577 |
|    |        |        |        | 159 | → | 164 | 0.18005  |
|    |        |        |        | 159 | → | 165 | 0.16332  |
|    |        |        |        | 159 | → | 166 | 0.29404  |
|    |        |        |        | 160 | → | 167 | 0.25044  |
|    |        |        |        | 160 | → | 169 | -0.26707 |
|    |        |        |        | 160 | → | 170 | -0.11838 |
|    |        |        |        | 160 | → | 171 | 0.10486  |
|    |        |        |        | 160 | → | 174 | -0.10008 |
| 28 | 4.1995 | 295.23 | 0.0028 | 158 | → | 164 | 0.17379  |
|    |        |        |        | 159 | → | 166 | 0.2773   |
|    |        |        |        | 159 | → | 168 | 0.10089  |
|    |        |        |        | 160 | → | 165 | 0.10766  |
|    |        |        |        | 160 | → | 168 | -0.31298 |
|    |        |        |        | 160 | → | 169 | 0.44879  |
| 29 | 4.2438 | 292.15 | 0.0043 | 155 | → | 162 | -0.14705 |
|    |        |        |        | 158 | → | 164 | 0.40403  |
|    |        |        |        | 158 | → | 165 | 0.18318  |
|    |        |        |        | 158 | → | 170 | 0.11492  |
|    |        |        |        | 159 | → | 165 | -0.29728 |
|    |        |        |        | 159 | → | 166 | -0.17251 |
|    |        |        |        | 159 | → | 168 | -0.16784 |
|    |        |        |        | 160 | → | 168 | -0.14956 |
|    |        |        |        | 160 | → | 169 | -0.14574 |
|    |        |        |        | 160 | → | 171 | -0.11835 |
| 30 | 4.2589 | 291.12 | 0.0039 | 155 | → | 162 | 0.55035  |
|    |        |        |        | 156 | → | 162 | -0.16351 |
|    |        |        |        | 158 | → | 166 | 0.1159   |
|    |        |        |        | 159 | → | 165 | -0.13882 |
|    |        |        |        | 159 | → | 167 | 0.1687   |
|    |        |        |        | 159 | → | 168 | -0.14075 |
| 31 | 4.2841 | 289.41 | 0.002  | 155 | → | 162 | 0.31075  |
|    |        |        |        | 155 | → | 163 | 0.14905  |
|    |        |        |        | 158 | → | 164 | 0.11853  |
|    |        |        |        | 158 | → | 165 | 0.19788  |
|    |        |        |        | 158 | → | 166 | -0.16916 |
|    |        |        |        | 158 | → | 168 | -0.14178 |
|    |        |        |        | 159 | → | 165 | 0.14941  |
|    |        |        |        | 159 | → | 166 | 0.11348  |
|    |        |        |        | 159 | → | 167 | -0.27568 |
|    |        |        |        | 159 | → | 168 | 0.15944  |
|    |        |        |        | 160 | → | 169 | -0.13137 |
|    |        |        |        | 160 | → | 170 | 0.12799  |
|    |        |        |        | 160 | → | 171 | -0.15528 |
|    |        |        |        | 160 | → | 174 | 0.10558  |

|    |        |        |        |     |   |     |          |
|----|--------|--------|--------|-----|---|-----|----------|
| 32 | 4.3162 | 287.25 | 0.0064 | 158 | → | 165 | 0.13119  |
|    |        |        |        | 158 | → | 166 | 0.50491  |
|    |        |        |        | 158 | → | 168 | 0.11429  |
|    |        |        |        | 158 | → | 169 | -0.13233 |
|    |        |        |        | 159 | → | 165 | 0.12908  |
|    |        |        |        | 159 | → | 167 | -0.22656 |
|    |        |        |        | 160 | → | 168 | 0.13316  |
| 33 | 4.3338 | 286.09 | 0.0008 | 155 | → | 162 | -0.10767 |
|    |        |        |        | 155 | → | 163 | 0.6345   |
| 34 | 4.3645 | 284.07 | 0.011  | 158 | → | 165 | 0.13892  |
|    |        |        |        | 158 | → | 168 | -0.13937 |
|    |        |        |        | 159 | → | 165 | 0.2916   |
|    |        |        |        | 159 | → | 166 | -0.10798 |
|    |        |        |        | 159 | → | 167 | 0.40084  |
| 35 | 4.4003 | 281.76 | 0.0152 | 159 | → | 169 | 0.31783  |
|    |        |        |        | 158 | → | 166 | 0.13648  |
|    |        |        |        | 158 | → | 168 | 0.10726  |
|    |        |        |        | 159 | → | 166 | -0.18731 |
|    |        |        |        | 159 | → | 167 | 0.18146  |
| 36 | 4.4361 | 279.49 | 0.0024 | 159 | → | 168 | 0.53594  |
|    |        |        |        | 159 | → | 169 | -0.21833 |
|    |        |        |        | 155 | → | 163 | 0.16153  |
|    |        |        |        | 158 | → | 165 | -0.10674 |
|    |        |        |        | 158 | → | 168 | -0.13203 |
|    |        |        |        | 158 | → | 171 | 0.11192  |
|    |        |        |        | 159 | → | 165 | -0.1034  |
|    |        |        |        | 159 | → | 166 | 0.11023  |
|    |        |        |        | 159 | → | 167 | 0.1362   |
|    |        |        |        | 159 | → | 168 | -0.10811 |
| 37 | 4.4378 | 279.38 | 0.004  | 159 | → | 171 | 0.3077   |
|    |        |        |        | 159 | → | 174 | -0.1864  |
|    |        |        |        | 160 | → | 168 | 0.19514  |
|    |        |        |        | 160 | → | 170 | 0.28254  |
|    |        |        |        | 160 | → | 175 | 0.16217  |
|    |        |        |        | 158 | → | 164 | -0.1123  |
|    |        |        |        | 158 | → | 165 | 0.4331   |
|    |        |        |        | 158 | → | 167 | -0.23423 |
|    |        |        |        | 158 | → | 168 | 0.22277  |
|    |        |        |        | 158 | → | 170 | -0.10023 |
| 38 | 4.4843 | 276.48 | 0.0083 | 159 | → | 167 | 0.16601  |
|    |        |        |        | 159 | → | 168 | -0.11606 |
|    |        |        |        | 159 | → | 169 | -0.20751 |
|    |        |        |        | 159 | → | 170 | -0.15117 |
|    |        |        |        | 152 | → | 162 | 0.14347  |
|    |        |        |        | 154 | → | 161 | 0.10403  |
|    |        |        |        | 158 | → | 167 | 0.24176  |

|    |        |        |        |     |   |     |          |
|----|--------|--------|--------|-----|---|-----|----------|
|    |        |        |        | 158 | → | 168 | 0.44267  |
|    |        |        |        | 158 | → | 171 | 0.12446  |
|    |        |        |        | 159 | → | 169 | 0.26203  |
|    |        |        |        | 159 | → | 171 | 0.16145  |
| 39 | 4.4983 | 275.63 | 0.0017 | 158 | → | 165 | 0.11264  |
|    |        |        |        | 158 | → | 167 | 0.29137  |
|    |        |        |        | 158 | → | 171 | -0.25782 |
|    |        |        |        | 158 | → | 174 | 0.14261  |
|    |        |        |        | 159 | → | 169 | -0.17646 |
|    |        |        |        | 159 | → | 170 | 0.15783  |
|    |        |        |        | 159 | → | 175 | 0.11734  |
|    |        |        |        | 160 | → | 165 | -0.10295 |
|    |        |        |        | 160 | → | 171 | 0.29363  |
|    |        |        |        | 160 | → | 174 | -0.12121 |
| 40 | 4.5674 | 271.46 | 0.0292 | 153 | → | 163 | -0.10447 |
|    |        |        |        | 154 | → | 161 | 0.12446  |
|    |        |        |        | 157 | → | 164 | -0.13285 |
|    |        |        |        | 158 | → | 169 | 0.50166  |
|    |        |        |        | 159 | → | 167 | -0.12732 |
|    |        |        |        | 159 | → | 169 | 0.1793   |
|    |        |        |        | 159 | → | 170 | 0.15004  |

**Table S17.** TDDFT calculated transitions for *cis-fac*-[Ru(DQPz)<sub>2</sub>]<sup>2+</sup>.

| Excited State | Energy (eV) | Wavelength (nm) | f      | Transitions |   |     |          |
|---------------|-------------|-----------------|--------|-------------|---|-----|----------|
| 1             | 2.5239      | 491.24          | 0.0214 | 175         | → | 176 | 0.68051  |
|               |             |                 |        | 175         | → | 178 | -0.15364 |
| 2             | 2.578       | 480.93          | 0.0204 | 175         | → | 177 | 0.66938  |
|               |             |                 |        | 175         | → | 179 | -0.17212 |
| 3             | 2.6846      | 461.83          | 0.0358 | 174         | → | 176 | -0.17112 |
|               |             |                 |        | 175         | → | 176 | 0.14066  |
|               |             |                 |        | 175         | → | 178 | 0.65541  |
| 4             | 2.7572      | 449.67          | 0.0868 | 174         | → | 176 | 0.65132  |
|               |             |                 |        | 174         | → | 178 | -0.18347 |
|               |             |                 |        | 175         | → | 178 | 0.1281   |
| 5             | 2.7753      | 446.75          | 0.0898 | 174         | → | 177 | 0.66026  |
|               |             |                 |        | 174         | → | 179 | 0.17921  |
| 6             | 2.8755      | 431.18          | 0.0152 | 174         | → | 176 | 0.17132  |
|               |             |                 |        | 174         | → | 178 | 0.64558  |
|               |             |                 |        | 174         | → | 186 | 0.10165  |
|               |             |                 |        | 175         | → | 178 | 0.11477  |
| 7             | 2.8787      | 430.7           | 0.1011 | 174         | → | 179 | -0.28052 |
|               |             |                 |        | 175         | → | 177 | 0.12147  |
|               |             |                 |        | 175         | → | 179 | 0.61664  |
| 8             | 3.0822      | 402.26          | 0.0039 | 172         | → | 177 | 0.24866  |
|               |             |                 |        | 173         | → | 177 | 0.65476  |
| 9             | 3.1104      | 398.61          | 0.0315 | 172         | → | 176 | 0.25232  |

|    |        |        |        |     |   |     |          |
|----|--------|--------|--------|-----|---|-----|----------|
|    |        |        |        | 173 | → | 176 | 0.63454  |
|    |        |        |        | 174 | → | 179 | -0.13205 |
| 10 | 3.2662 | 379.6  | 0.0128 | 172 | → | 178 | 0.23171  |
|    |        |        |        | 173 | → | 178 | 0.63987  |
| 11 | 3.2913 | 376.7  | 0.0011 | 173 | → | 176 | 0.13629  |
|    |        |        |        | 174 | → | 177 | -0.14444 |
|    |        |        |        | 174 | → | 179 | 0.58003  |
|    |        |        |        | 175 | → | 177 | 0.12415  |
|    |        |        |        | 175 | → | 179 | 0.24948  |
| 12 | 3.4167 | 362.88 | 0.0017 | 172 | → | 179 | 0.24361  |
|    |        |        |        | 173 | → | 179 | 0.64105  |
| 13 | 3.5113 | 353.1  | 0.335  | 172 | → | 176 | 0.64162  |
|    |        |        |        | 173 | → | 176 | -0.24562 |
| 14 | 3.517  | 352.53 | 0.0831 | 171 | → | 176 | -0.15073 |
|    |        |        |        | 172 | → | 177 | 0.63183  |
|    |        |        |        | 173 | → | 177 | -0.24286 |
| 15 | 3.6056 | 343.86 | 0.0186 | 175 | → | 180 | 0.66452  |
|    |        |        |        | 175 | → | 183 | 0.13726  |
| 16 | 3.672  | 337.64 | 0.0118 | 171 | → | 176 | 0.59797  |
|    |        |        |        | 171 | → | 178 | -0.13329 |
|    |        |        |        | 172 | → | 177 | 0.14301  |
|    |        |        |        | 174 | → | 186 | -0.14567 |
|    |        |        |        | 174 | → | 189 | -0.12558 |
|    |        |        |        | 175 | → | 180 | -0.10111 |
| 17 | 3.6803 | 336.89 | 0.0269 | 171 | → | 177 | -0.12096 |
|    |        |        |        | 172 | → | 178 | 0.4382   |
|    |        |        |        | 173 | → | 178 | -0.19023 |
|    |        |        |        | 175 | → | 181 | -0.43505 |
|    |        |        |        | 175 | → | 182 | 0.18774  |
| 18 | 3.7145 | 333.78 | 0.0578 | 171 | → | 177 | 0.67152  |
|    |        |        |        | 175 | → | 181 | -0.10504 |
| 19 | 3.7168 | 333.58 | 0.0096 | 172 | → | 178 | 0.47488  |
|    |        |        |        | 173 | → | 178 | -0.13516 |
|    |        |        |        | 175 | → | 181 | 0.42026  |
|    |        |        |        | 175 | → | 182 | -0.18715 |
| 20 | 3.7403 | 331.48 | 0.0034 | 171 | → | 176 | 0.27324  |
|    |        |        |        | 171 | → | 178 | 0.22739  |
|    |        |        |        | 171 | → | 186 | 0.12369  |
|    |        |        |        | 174 | → | 178 | -0.1389  |
|    |        |        |        | 174 | → | 180 | -0.19958 |
|    |        |        |        | 174 | → | 186 | 0.26297  |
|    |        |        |        | 174 | → | 189 | 0.21469  |
|    |        |        |        | 174 | → | 191 | 0.13138  |
|    |        |        |        | 175 | → | 186 | 0.22371  |
|    |        |        |        | 175 | → | 189 | 0.16616  |
|    |        |        |        | 175 | → | 191 | 0.10195  |

|    |        |        |        |     |   |     |          |
|----|--------|--------|--------|-----|---|-----|----------|
| 21 | 3.7974 | 326.5  | 0.0088 | 171 | → | 176 | 0.12755  |
|    |        |        |        | 174 | → | 180 | 0.59936  |
|    |        |        |        | 174 | → | 186 | 0.17831  |
|    |        |        |        | 174 | → | 189 | 0.14023  |
| 22 | 3.8654 | 320.76 | 0.0018 | 174 | → | 182 | -0.1499  |
|    |        |        |        | 175 | → | 181 | 0.22114  |
|    |        |        |        | 175 | → | 182 | 0.61506  |
|    |        |        |        | 175 | → | 193 | -0.11872 |
| 23 | 3.9013 | 317.81 | 0.0042 | 171 | → | 178 | 0.41096  |
|    |        |        |        | 172 | → | 179 | -0.3925  |
|    |        |        |        | 173 | → | 179 | 0.19629  |
|    |        |        |        | 174 | → | 180 | -0.13929 |
|    |        |        |        | 175 | → | 183 | 0.11196  |
|    |        |        |        | 175 | → | 186 | -0.21226 |
|    |        |        |        | 175 | → | 189 | -0.12516 |
|    |        |        |        | 175 | → | 189 | -0.12516 |
| 24 | 3.9202 | 316.27 | 0.0128 | 171 | → | 178 | 0.3844   |
|    |        |        |        | 173 | → | 179 | -0.11629 |
|    |        |        |        | 174 | → | 180 | 0.21572  |
|    |        |        |        | 174 | → | 183 | 0.12734  |
|    |        |        |        | 174 | → | 186 | -0.26961 |
|    |        |        |        | 174 | → | 189 | -0.19886 |
|    |        |        |        | 174 | → | 191 | -0.11146 |
|    |        |        |        | 175 | → | 183 | -0.13843 |
|    |        |        |        | 175 | → | 186 | 0.21733  |
|    |        |        |        | 175 | → | 189 | 0.13729  |
| 25 | 3.9336 | 315.19 | 0.0071 | 171 | → | 178 | 0.27575  |
|    |        |        |        | 172 | → | 179 | 0.51177  |
|    |        |        |        | 173 | → | 179 | -0.14064 |
|    |        |        |        | 175 | → | 180 | -0.11415 |
|    |        |        |        | 175 | → | 183 | 0.15885  |
|    |        |        |        | 175 | → | 186 | -0.20656 |
|    |        |        |        | 175 | → | 189 | -0.13095 |
| 26 | 3.9379 | 314.85 | 0.0579 | 174 | → | 181 | 0.49635  |
|    |        |        |        | 174 | → | 182 | -0.46272 |
| 27 | 4.0143 | 308.85 | 0.0025 | 175 | → | 183 | 0.62124  |
|    |        |        |        | 175 | → | 186 | 0.19382  |
|    |        |        |        | 175 | → | 189 | 0.12391  |
| 28 | 4.0268 | 307.9  | 0.0001 | 165 | → | 177 | -0.10335 |
|    |        |        |        | 166 | → | 176 | 0.134    |
|    |        |        |        | 171 | → | 179 | 0.10948  |
|    |        |        |        | 174 | → | 181 | 0.41348  |
|    |        |        |        | 174 | → | 182 | 0.46101  |
|    |        |        |        | 175 | → | 182 | 0.15349  |
| 29 | 4.0867 | 303.39 | 0.0002 | 168 | → | 176 | -0.1321  |
|    |        |        |        | 168 | → | 178 | -0.15558 |
|    |        |        |        | 174 | → | 181 | 0.10869  |

|    |        |        |        |     |   |     |          |
|----|--------|--------|--------|-----|---|-----|----------|
| 30 | 4.1069 | 301.89 | 0.004  | 175 | → | 184 | 0.61922  |
|    |        |        |        | 167 | → | 178 | -0.13729 |
|    |        |        |        | 168 | → | 177 | -0.12754 |
|    |        |        |        | 168 | → | 179 | -0.11498 |
|    |        |        |        | 170 | → | 176 | -0.12116 |
| 31 | 4.1183 | 301.05 | 0.0036 | 174 | → | 183 | -0.30427 |
|    |        |        |        | 175 | → | 185 | 0.53023  |
|    |        |        |        | 170 | → | 177 | 0.10341  |
|    |        |        |        | 171 | → | 179 | 0.63689  |
|    |        |        |        | 173 | → | 180 | 0.19083  |
| 32 | 4.1537 | 298.49 | 0.0055 | 165 | → | 176 | -0.13211 |
|    |        |        |        | 166 | → | 177 | 0.14679  |
|    |        |        |        | 174 | → | 183 | 0.5141   |
|    |        |        |        | 174 | → | 185 | 0.10751  |
|    |        |        |        | 175 | → | 183 | 0.13117  |
| 33 | 4.2076 | 294.67 | 0.0034 | 175 | → | 185 | 0.32237  |
|    |        |        |        | 172 | → | 186 | 0.13022  |
|    |        |        |        | 172 | → | 189 | 0.11364  |
|    |        |        |        | 173 | → | 186 | 0.2654   |
|    |        |        |        | 173 | → | 189 | 0.21077  |
|    |        |        |        | 173 | → | 191 | 0.13192  |
|    |        |        |        | 174 | → | 184 | -0.11439 |
|    |        |        |        | 174 | → | 193 | -0.13383 |
|    |        |        |        | 175 | → | 181 | 0.1861   |
|    |        |        |        | 175 | → | 187 | 0.11952  |
| 34 | 4.3017 | 288.22 | 0.0167 | 175 | → | 188 | 0.11844  |
|    |        |        |        | 175 | → | 190 | -0.17481 |
|    |        |        |        | 175 | → | 193 | 0.33713  |
|    |        |        |        | 172 | → | 181 | 0.22001  |
|    |        |        |        | 172 | → | 182 | -0.12274 |
| 35 | 4.3154 | 287.31 | 0.0012 | 173 | → | 181 | 0.54102  |
|    |        |        |        | 173 | → | 182 | -0.2699  |
|    |        |        |        | 175 | → | 186 | 0.13302  |
|    |        |        |        | 169 | → | 176 | -0.25953 |
|    |        |        |        | 171 | → | 179 | -0.1773  |
| 36 | 4.3387 | 285.76 | 0.017  | 172 | → | 180 | 0.18453  |
|    |        |        |        | 173 | → | 180 | 0.46577  |
|    |        |        |        | 174 | → | 184 | -0.26211 |
|    |        |        |        | 166 | → | 176 | 0.12983  |
|    |        |        |        | 168 | → | 176 | -0.114   |
| 37 | 4.3551 | 284.69 | 0.0266 | 168 | → | 178 | -0.10036 |
|    |        |        |        | 169 | → | 176 | -0.25793 |
|    |        |        |        | 173 | → | 180 | 0.1781   |
|    |        |        |        | 174 | → | 184 | 0.52247  |
|    |        |        |        | 175 | → | 184 | -0.13207 |



|    |        |        |        |     |   |     |          |
|----|--------|--------|--------|-----|---|-----|----------|
|    |        |        |        | 170 | → | 176 | 0.64123  |
|    |        |        |        | 174 | → | 183 | -0.10575 |
|    |        |        |        | 174 | → | 185 | -0.12926 |
|    |        |        |        | 175 | → | 185 | 0.11252  |
| 38 | 4.3847 | 282.77 | 0.0002 | 169 | → | 176 | 0.41724  |
|    |        |        |        | 170 | → | 177 | 0.42387  |
|    |        |        |        | 171 | → | 179 | -0.13404 |
|    |        |        |        | 173 | → | 180 | 0.24994  |
| 39 | 4.3873 | 282.6  | 0.0093 | 168 | → | 177 | -0.10429 |
|    |        |        |        | 169 | → | 177 | 0.23362  |
|    |        |        |        | 170 | → | 176 | 0.14591  |
|    |        |        |        | 170 | → | 178 | -0.10884 |
|    |        |        |        | 173 | → | 182 | -0.11699 |
|    |        |        |        | 174 | → | 183 | -0.1083  |
|    |        |        |        | 174 | → | 185 | 0.5352   |
|    |        |        |        | 175 | → | 185 | -0.15798 |
| 40 | 4.3925 | 282.26 | 0.0004 | 169 | → | 176 | -0.38261 |
|    |        |        |        | 170 | → | 177 | 0.52228  |
|    |        |        |        | 173 | → | 180 | -0.15848 |

**Table S18.** TDDFT calculated transitions for *trans-fac*-[Ru(DQPz)<sub>2</sub>]<sup>2+</sup>.

| Excited State | Energy (eV) | Wavelength (nm) | f      | Transitions |   |     |          |
|---------------|-------------|-----------------|--------|-------------|---|-----|----------|
| 1             | 2.4483      | 506.42          | 0.0857 | 175         | → | 176 | 0.69657  |
| 2             | 2.5288      | 490.28          | 0.0011 | 174         | → | 177 | 0.24198  |
|               |             |                 |        | 175         | → | 177 | 0.63377  |
|               |             |                 |        | 175         | → | 178 | -0.14427 |
| 3             | 2.6351      | 470.51          | 0.1097 | 174         | → | 177 | 0.14497  |
|               |             |                 |        | 174         | → | 178 | 0.10024  |
|               |             |                 |        | 175         | → | 178 | 0.67201  |
| 4             | 2.6923      | 460.51          | 0.0147 | 175         | → | 179 | 0.68245  |
|               |             |                 |        | 175         | → | 186 | -0.11093 |
| 5             | 2.8531      | 434.56          | 0.0019 | 173         | → | 179 | 0.10621  |
|               |             |                 |        | 174         | → | 177 | 0.61984  |
|               |             |                 |        | 175         | → | 177 | -0.24778 |
|               |             |                 |        | 175         | → | 178 | -0.11273 |
| 6             | 2.8885      | 429.23          | 0.0194 | 174         | → | 176 | 0.68108  |
|               |             |                 |        | 174         | → | 179 | -0.10013 |
| 7             | 3.0387      | 408.01          | 0.0023 | 171         | → | 177 | 0.25966  |
|               |             |                 |        | 173         | → | 177 | 0.54703  |
|               |             |                 |        | 174         | → | 176 | 0.1272   |
|               |             |                 |        | 174         | → | 179 | 0.28621  |
| 8             | 3.0629      | 404.8           | 0.0048 | 173         | → | 176 | 0.29807  |
|               |             |                 |        | 174         | → | 178 | 0.62263  |
| 9             | 3.1366      | 395.29          | 0.0006 | 171         | → | 177 | -0.13879 |
|               |             |                 |        | 173         | → | 177 | -0.29166 |
|               |             |                 |        | 174         | → | 179 | 0.57001  |

|    |        |        |        |     |   |     |          |
|----|--------|--------|--------|-----|---|-----|----------|
|    |        |        |        | 174 | → | 186 | -0.14784 |
| 10 | 3.1854 | 389.23 | 0.2184 | 171 | → | 176 | 0.23419  |
|    |        |        |        | 173 | → | 176 | 0.57874  |
|    |        |        |        | 174 | → | 178 | -0.2893  |
| 11 | 3.3252 | 372.86 | 0.0261 | 171 | → | 178 | 0.23104  |
|    |        |        |        | 173 | → | 178 | 0.65225  |
| 12 | 3.4597 | 358.36 | 0.0016 | 171 | → | 177 | 0.15242  |
|    |        |        |        | 172 | → | 176 | 0.67137  |
| 13 | 3.4642 | 357.9  | 0.0404 | 171 | → | 179 | 0.21667  |
|    |        |        |        | 172 | → | 177 | -0.19002 |
|    |        |        |        | 173 | → | 179 | 0.48134  |
|    |        |        |        | 175 | → | 181 | 0.2435   |
|    |        |        |        | 175 | → | 183 | 0.15839  |
|    |        |        |        | 175 | → | 185 | 0.11308  |
|    |        |        |        | 175 | → | 192 | 0.16653  |
| 14 | 3.4968 | 354.56 | 0.024  | 175 | → | 180 | 0.67433  |
|    |        |        |        | 175 | → | 182 | -0.11241 |
| 15 | 3.5149 | 352.74 | 0.3068 | 171 | → | 176 | 0.1672   |
|    |        |        |        | 172 | → | 177 | 0.62555  |
|    |        |        |        | 175 | → | 183 | 0.12757  |
| 16 | 3.5317 | 351.06 | 0.0014 | 171 | → | 176 | -0.16867 |
|    |        |        |        | 171 | → | 179 | -0.10493 |
|    |        |        |        | 173 | → | 179 | -0.36666 |
|    |        |        |        | 175 | → | 181 | 0.46207  |
|    |        |        |        | 175 | → | 183 | 0.22365  |
|    |        |        |        | 175 | → | 185 | 0.12713  |
|    |        |        |        | 175 | → | 192 | 0.13902  |
| 17 | 3.5648 | 347.8  | 0.0009 | 171 | → | 177 | 0.57743  |
|    |        |        |        | 172 | → | 176 | -0.17058 |
|    |        |        |        | 173 | → | 177 | -0.2945  |
| 18 | 3.5939 | 344.99 | 0.0633 | 171 | → | 176 | 0.6042   |
|    |        |        |        | 172 | → | 177 | -0.21535 |
|    |        |        |        | 173 | → | 176 | -0.21926 |
|    |        |        |        | 175 | → | 181 | 0.11455  |
| 19 | 3.6321 | 341.36 | 0.0007 | 171 | → | 177 | 0.13475  |
|    |        |        |        | 174 | → | 179 | -0.19034 |
|    |        |        |        | 174 | → | 186 | -0.16431 |
|    |        |        |        | 174 | → | 189 | -0.12391 |
|    |        |        |        | 174 | → | 190 | -0.11963 |
|    |        |        |        | 175 | → | 179 | 0.12739  |
|    |        |        |        | 175 | → | 180 | 0.13455  |
|    |        |        |        | 175 | → | 182 | 0.17668  |
|    |        |        |        | 175 | → | 184 | 0.11533  |
|    |        |        |        | 175 | → | 186 | 0.39496  |
|    |        |        |        | 175 | → | 189 | 0.24124  |
|    |        |        |        | 175 | → | 190 | 0.22777  |

|    |        |        |        |     |   |     |          |
|----|--------|--------|--------|-----|---|-----|----------|
| 20 | 3.6878 | 336.2  | 0.008  | 172 | → | 178 | 0.69391  |
| 21 | 3.7524 | 330.41 | 0.0038 | 171 | → | 178 | 0.61965  |
|    |        |        |        | 172 | → | 179 | 0.11524  |
|    |        |        |        | 173 | → | 178 | -0.22009 |
| 22 | 3.7861 | 327.47 | 0.0031 | 171 | → | 177 | 0.11926  |
|    |        |        |        | 171 | → | 178 | 0.1943   |
|    |        |        |        | 172 | → | 179 | -0.2968  |
|    |        |        |        | 174 | → | 179 | 0.18118  |
|    |        |        |        | 174 | → | 186 | 0.32784  |
|    |        |        |        | 174 | → | 189 | 0.23548  |
|    |        |        |        | 174 | → | 190 | 0.22498  |
|    |        |        |        | 175 | → | 182 | 0.15659  |
| 23 | 3.8344 | 323.35 | 0.0026 | 175 | → | 186 | 0.11199  |
|    |        |        |        | 172 | → | 179 | 0.58882  |
|    |        |        |        | 174 | → | 186 | 0.19029  |
|    |        |        |        | 174 | → | 189 | 0.13301  |
|    |        |        |        | 174 | → | 190 | 0.13094  |
| 24 | 3.8577 | 321.4  | 0.0064 | 175 | → | 184 | 0.11566  |
|    |        |        |        | 171 | → | 179 | 0.12732  |
|    |        |        |        | 173 | → | 179 | -0.10775 |
|    |        |        |        | 175 | → | 181 | -0.36505 |
| 25 | 3.8852 | 319.12 | 0.0138 | 175 | → | 183 | 0.54944  |
|    |        |        |        | 171 | → | 179 | 0.57911  |
|    |        |        |        | 171 | → | 186 | -0.10723 |
|    |        |        |        | 173 | → | 179 | -0.26707 |
| 26 | 3.9187 | 316.39 | 0.0081 | 175 | → | 183 | -0.1815  |
|    |        |        |        | 175 | → | 182 | 0.61772  |
|    |        |        |        | 175 | → | 184 | -0.18015 |
| 27 | 3.9918 | 310.6  | 0.0108 | 175 | → | 186 | -0.15661 |
|    |        |        |        | 168 | → | 178 | -0.10866 |
|    |        |        |        | 172 | → | 179 | -0.1273  |
|    |        |        |        | 174 | → | 180 | 0.29274  |
|    |        |        |        | 175 | → | 182 | 0.12223  |
| 28 | 4.011  | 309.11 | 0.0299 | 175 | → | 184 | 0.53391  |
|    |        |        |        | 175 | → | 186 | -0.14618 |
|    |        |        |        | 174 | → | 180 | 0.61194  |
|    |        |        |        | 175 | → | 184 | -0.28147 |
| 29 | 4.0111 | 309.1  | 0.0032 | 170 | → | 176 | -0.13266 |
|    |        |        |        | 175 | → | 181 | -0.15091 |
|    |        |        |        | 175 | → | 183 | -0.16767 |
|    |        |        |        | 175 | → | 185 | 0.59498  |
|    |        |        |        | 175 | → | 192 | 0.1064   |
| 30 | 4.0882 | 303.28 | 0.0018 | 170 | → | 176 | -0.11627 |
|    |        |        |        | 171 | → | 179 | -0.15924 |
|    |        |        |        | 171 | → | 186 | -0.10288 |
|    |        |        |        | 173 | → | 186 | -0.11332 |

|    |        |        |        |     |   |     |          |
|----|--------|--------|--------|-----|---|-----|----------|
|    |        |        |        | 174 | → | 181 | 0.42345  |
|    |        |        |        | 174 | → | 192 | 0.19     |
|    |        |        |        | 175 | → | 181 | -0.12327 |
|    |        |        |        | 175 | → | 185 | -0.15087 |
|    |        |        |        | 175 | → | 188 | -0.13084 |
|    |        |        |        | 175 | → | 192 | 0.26398  |
| 31 | 4.1689 | 297.4  | 0.0014 | 170 | → | 176 | -0.15383 |
|    |        |        |        | 171 | → | 179 | 0.15783  |
|    |        |        |        | 171 | → | 186 | 0.15302  |
|    |        |        |        | 171 | → | 189 | 0.11431  |
|    |        |        |        | 171 | → | 190 | 0.10832  |
|    |        |        |        | 173 | → | 180 | -0.19135 |
|    |        |        |        | 173 | → | 182 | 0.12682  |
|    |        |        |        | 173 | → | 186 | 0.16957  |
|    |        |        |        | 173 | → | 189 | 0.12177  |
|    |        |        |        | 173 | → | 190 | 0.1091   |
|    |        |        |        | 174 | → | 181 | 0.41197  |
|    |        |        |        | 175 | → | 188 | 0.10166  |
|    |        |        |        | 175 | → | 192 | -0.20154 |
| 32 | 4.1984 | 295.31 | 0.0028 | 171 | → | 180 | 0.20694  |
|    |        |        |        | 173 | → | 180 | 0.60581  |
|    |        |        |        | 175 | → | 192 | -0.11852 |
| 33 | 4.2454 | 292.04 | 0.0077 | 167 | → | 177 | -0.14584 |
|    |        |        |        | 168 | → | 177 | 0.15219  |
|    |        |        |        | 170 | → | 177 | -0.26051 |
|    |        |        |        | 171 | → | 181 | 0.11231  |
|    |        |        |        | 172 | → | 180 | -0.10671 |
|    |        |        |        | 173 | → | 181 | 0.44224  |
|    |        |        |        | 174 | → | 182 | 0.21427  |
| 34 | 4.2859 | 289.29 | 0.026  | 168 | → | 178 | 0.1187   |
|    |        |        |        | 170 | → | 177 | 0.47616  |
|    |        |        |        | 171 | → | 181 | 0.12857  |
|    |        |        |        | 171 | → | 192 | 0.10029  |
|    |        |        |        | 173 | → | 181 | 0.23622  |
|    |        |        |        | 173 | → | 183 | 0.25172  |
|    |        |        |        | 174 | → | 182 | -0.11205 |
|    |        |        |        | 175 | → | 184 | 0.13435  |
| 35 | 4.2879 | 289.15 | 0.0002 | 169 | → | 177 | -0.12159 |
|    |        |        |        | 170 | → | 176 | 0.61179  |
|    |        |        |        | 174 | → | 181 | 0.18694  |
|    |        |        |        | 175 | → | 185 | 0.13149  |
| 36 | 4.3201 | 286.99 | 0.0006 | 167 | → | 176 | 0.20756  |
|    |        |        |        | 167 | → | 179 | -0.1072  |
|    |        |        |        | 168 | → | 176 | -0.28769 |
|    |        |        |        | 170 | → | 179 | -0.13149 |
|    |        |        |        | 172 | → | 181 | 0.13823  |

|    |        |        |        |     |   |     |          |
|----|--------|--------|--------|-----|---|-----|----------|
|    |        |        |        | 173 | → | 182 | -0.14969 |
|    |        |        |        | 173 | → | 184 | 0.10346  |
|    |        |        |        | 174 | → | 183 | 0.4274   |
| 37 | 4.3443 | 285.39 | 0.0048 | 167 | → | 177 | -0.11687 |
|    |        |        |        | 168 | → | 177 | 0.18653  |
|    |        |        |        | 170 | → | 177 | 0.20861  |
|    |        |        |        | 170 | → | 178 | 0.37162  |
|    |        |        |        | 173 | → | 181 | -0.12006 |
|    |        |        |        | 173 | → | 183 | -0.10293 |
|    |        |        |        | 173 | → | 185 | -0.17743 |
|    |        |        |        | 174 | → | 182 | 0.31579  |
|    |        |        |        | 175 | → | 184 | 0.13946  |
|    |        |        |        | 175 | → | 186 | -0.10128 |
| 38 | 4.4035 | 281.56 | 0.0116 | 168 | → | 177 | -0.10827 |
|    |        |        |        | 169 | → | 176 | -0.25852 |
|    |        |        |        | 170 | → | 177 | 0.26456  |
|    |        |        |        | 170 | → | 178 | -0.34439 |
|    |        |        |        | 174 | → | 182 | 0.38365  |
|    |        |        |        | 174 | → | 184 | -0.18461 |
| 39 | 4.4072 | 281.32 | 0.0037 | 167 | → | 176 | -0.14821 |
|    |        |        |        | 168 | → | 176 | 0.27733  |
|    |        |        |        | 169 | → | 177 | -0.15174 |
|    |        |        |        | 170 | → | 179 | 0.12952  |
|    |        |        |        | 173 | → | 182 | 0.22368  |
|    |        |        |        | 174 | → | 181 | -0.24246 |
|    |        |        |        | 174 | → | 183 | 0.32957  |
|    |        |        |        | 174 | → | 185 | 0.13243  |
|    |        |        |        | 175 | → | 192 | 0.14335  |
| 40 | 4.4483 | 278.72 | 0.0058 | 165 | → | 177 | -0.11717 |
|    |        |        |        | 166 | → | 178 | 0.13034  |
|    |        |        |        | 167 | → | 176 | 0.24413  |
|    |        |        |        | 168 | → | 176 | 0.23372  |
|    |        |        |        | 168 | → | 179 | 0.14565  |
|    |        |        |        | 169 | → | 177 | 0.29449  |
|    |        |        |        | 170 | → | 179 | 0.16169  |
|    |        |        |        | 172 | → | 181 | 0.10068  |
|    |        |        |        | 173 | → | 182 | -0.21138 |
|    |        |        |        | 173 | → | 184 | -0.17896 |
|    |        |        |        | 174 | → | 185 | 0.13166  |
|    |        |        |        | 175 | → | 185 | 0.16009  |
|    |        |        |        | 175 | → | 187 | -0.13029 |

**Table S19.** TDDFT calculated transitions for C-R<sub>a</sub>-mer-[Ru(DQPz)<sub>2</sub>]<sup>2+</sup>.

| Excited State | Energy (eV) | Wavelength (nm) | f      | Transitions |   |     |          |
|---------------|-------------|-----------------|--------|-------------|---|-----|----------|
| 1             | 2.5239      | 491.24          | 0.0214 | 175         | → | 176 | 0.68051  |
|               |             |                 |        | 175         | → | 178 | -0.15364 |

|    |        |        |        |     |   |     |          |
|----|--------|--------|--------|-----|---|-----|----------|
| 2  | 2.578  | 480.93 | 0.0204 | 175 | → | 177 | 0.66938  |
|    |        |        |        | 175 | → | 179 | -0.17212 |
| 3  | 2.6846 | 461.83 | 0.0358 | 174 | → | 176 | -0.17112 |
|    |        |        |        | 175 | → | 176 | 0.14066  |
|    |        |        |        | 175 | → | 178 | 0.65541  |
| 4  | 2.7572 | 449.67 | 0.0868 | 174 | → | 176 | 0.65132  |
|    |        |        |        | 174 | → | 178 | -0.18347 |
|    |        |        |        | 175 | → | 178 | 0.1281   |
| 5  | 2.7753 | 446.75 | 0.0898 | 174 | → | 177 | 0.66026  |
|    |        |        |        | 174 | → | 179 | 0.17921  |
| 6  | 2.8755 | 431.18 | 0.0152 | 174 | → | 176 | 0.17132  |
|    |        |        |        | 174 | → | 178 | 0.64558  |
|    |        |        |        | 174 | → | 186 | 0.10165  |
|    |        |        |        | 175 | → | 178 | 0.11477  |
| 7  | 2.8787 | 430.7  | 0.1011 | 174 | → | 179 | -0.28052 |
|    |        |        |        | 175 | → | 177 | 0.12147  |
|    |        |        |        | 175 | → | 179 | 0.61664  |
| 8  | 3.0822 | 402.26 | 0.0039 | 172 | → | 177 | 0.24866  |
|    |        |        |        | 173 | → | 177 | 0.65476  |
| 9  | 3.1104 | 398.61 | 0.0315 | 172 | → | 176 | 0.25232  |
|    |        |        |        | 173 | → | 176 | 0.63454  |
|    |        |        |        | 174 | → | 179 | -0.13205 |
| 10 | 3.2662 | 379.6  | 0.0128 | 172 | → | 178 | 0.23171  |
|    |        |        |        | 173 | → | 178 | 0.63987  |
| 11 | 3.2913 | 376.7  | 0.0011 | 173 | → | 176 | 0.13629  |
|    |        |        |        | 174 | → | 177 | -0.14444 |
|    |        |        |        | 174 | → | 179 | 0.58003  |
|    |        |        |        | 175 | → | 177 | 0.12415  |
|    |        |        |        | 175 | → | 179 | 0.24948  |
| 12 | 3.4167 | 362.88 | 0.0017 | 172 | → | 179 | 0.24361  |
|    |        |        |        | 173 | → | 179 | 0.64105  |
| 13 | 3.5113 | 353.1  | 0.335  | 172 | → | 176 | 0.64162  |
|    |        |        |        | 173 | → | 176 | -0.24562 |
| 14 | 3.517  | 352.53 | 0.0831 | 171 | → | 176 | -0.15073 |
|    |        |        |        | 172 | → | 177 | 0.63183  |
|    |        |        |        | 173 | → | 177 | -0.24286 |
| 15 | 3.6056 | 343.86 | 0.0186 | 175 | → | 180 | 0.66452  |
|    |        |        |        | 175 | → | 183 | 0.13726  |
| 16 | 3.672  | 337.64 | 0.0118 | 171 | → | 176 | 0.59797  |
|    |        |        |        | 171 | → | 178 | -0.13329 |
|    |        |        |        | 172 | → | 177 | 0.14301  |
|    |        |        |        | 174 | → | 186 | -0.14567 |
|    |        |        |        | 174 | → | 189 | -0.12558 |
| 17 | 3.6803 | 336.89 | 0.0269 | 175 | → | 180 | -0.10111 |
|    |        |        |        | 171 | → | 177 | -0.12096 |
|    |        |        |        | 172 | → | 178 | 0.4382   |

|    |        |        |        |     |   |     |          |
|----|--------|--------|--------|-----|---|-----|----------|
|    |        |        |        | 173 | → | 178 | -0.19023 |
|    |        |        |        | 175 | → | 181 | -0.43505 |
|    |        |        |        | 175 | → | 182 | 0.18774  |
| 18 | 3.7145 | 333.78 | 0.0578 | 171 | → | 177 | 0.67152  |
|    |        |        |        | 175 | → | 181 | -0.10504 |
| 19 | 3.7168 | 333.58 | 0.0096 | 172 | → | 178 | 0.47488  |
|    |        |        |        | 173 | → | 178 | -0.13516 |
|    |        |        |        | 175 | → | 181 | 0.42026  |
|    |        |        |        | 175 | → | 182 | -0.18715 |
| 20 | 3.7403 | 331.48 | 0.0034 | 171 | → | 176 | 0.27324  |
|    |        |        |        | 171 | → | 178 | 0.22739  |
|    |        |        |        | 171 | → | 186 | 0.12369  |
|    |        |        |        | 174 | → | 178 | -0.1389  |
|    |        |        |        | 174 | → | 180 | -0.19958 |
|    |        |        |        | 174 | → | 186 | 0.26297  |
|    |        |        |        | 174 | → | 189 | 0.21469  |
|    |        |        |        | 174 | → | 191 | 0.13138  |
|    |        |        |        | 175 | → | 186 | 0.22371  |
|    |        |        |        | 175 | → | 189 | 0.16616  |
|    |        |        |        | 175 | → | 191 | 0.10195  |
| 21 | 3.7974 | 326.5  | 0.0088 | 171 | → | 176 | 0.12755  |
|    |        |        |        | 174 | → | 180 | 0.59936  |
|    |        |        |        | 174 | → | 186 | 0.17831  |
|    |        |        |        | 174 | → | 189 | 0.14023  |
| 22 | 3.8654 | 320.76 | 0.0018 | 174 | → | 182 | -0.1499  |
|    |        |        |        | 175 | → | 181 | 0.22114  |
|    |        |        |        | 175 | → | 182 | 0.61506  |
|    |        |        |        | 175 | → | 193 | -0.11872 |
| 23 | 3.9013 | 317.81 | 0.0042 | 171 | → | 178 | 0.41096  |
|    |        |        |        | 172 | → | 179 | -0.3925  |
|    |        |        |        | 173 | → | 179 | 0.19629  |
|    |        |        |        | 174 | → | 180 | -0.13929 |
|    |        |        |        | 175 | → | 183 | 0.11196  |
|    |        |        |        | 175 | → | 186 | -0.21226 |
|    |        |        |        | 175 | → | 189 | -0.12516 |
| 24 | 3.9202 | 316.27 | 0.0128 | 171 | → | 178 | 0.3844   |
|    |        |        |        | 173 | → | 179 | -0.11629 |
|    |        |        |        | 174 | → | 180 | 0.21572  |
|    |        |        |        | 174 | → | 183 | 0.12734  |
|    |        |        |        | 174 | → | 186 | -0.26961 |
|    |        |        |        | 174 | → | 189 | -0.19886 |
|    |        |        |        | 174 | → | 191 | -0.11146 |
|    |        |        |        | 175 | → | 183 | -0.13843 |
|    |        |        |        | 175 | → | 186 | 0.21733  |
|    |        |        |        | 175 | → | 189 | 0.13729  |
| 25 | 3.9336 | 315.19 | 0.0071 | 171 | → | 178 | 0.27575  |

|    |        |        |        |     |   |     |          |
|----|--------|--------|--------|-----|---|-----|----------|
|    |        |        |        | 172 | → | 179 | 0.51177  |
|    |        |        |        | 173 | → | 179 | -0.14064 |
|    |        |        |        | 175 | → | 180 | -0.11415 |
|    |        |        |        | 175 | → | 183 | 0.15885  |
|    |        |        |        | 175 | → | 186 | -0.20656 |
|    |        |        |        | 175 | → | 189 | -0.13095 |
| 26 | 3.9379 | 314.85 | 0.0579 | 174 | → | 181 | 0.49635  |
|    |        |        |        | 174 | → | 182 | -0.46272 |
| 27 | 4.0143 | 308.85 | 0.0025 | 175 | → | 183 | 0.62124  |
|    |        |        |        | 175 | → | 186 | 0.19382  |
|    |        |        |        | 175 | → | 189 | 0.12391  |
| 28 | 4.0268 | 307.9  | 0.0001 | 165 | → | 177 | -0.10335 |
|    |        |        |        | 166 | → | 176 | 0.134    |
|    |        |        |        | 171 | → | 179 | 0.10948  |
|    |        |        |        | 174 | → | 181 | 0.41348  |
|    |        |        |        | 174 | → | 182 | 0.46101  |
|    |        |        |        | 175 | → | 182 | 0.15349  |
| 29 | 4.0867 | 303.39 | 0.0002 | 168 | → | 176 | -0.1321  |
|    |        |        |        | 168 | → | 178 | -0.15558 |
|    |        |        |        | 174 | → | 181 | 0.10869  |
|    |        |        |        | 175 | → | 184 | 0.61922  |
| 30 | 4.1069 | 301.89 | 0.004  | 167 | → | 178 | -0.13729 |
|    |        |        |        | 168 | → | 177 | -0.12754 |
|    |        |        |        | 168 | → | 179 | -0.11498 |
|    |        |        |        | 170 | → | 176 | -0.12116 |
|    |        |        |        | 174 | → | 183 | -0.30427 |
|    |        |        |        | 175 | → | 185 | 0.53023  |
| 31 | 4.1183 | 301.05 | 0.0036 | 170 | → | 177 | 0.10341  |
|    |        |        |        | 171 | → | 179 | 0.63689  |
|    |        |        |        | 173 | → | 180 | 0.19083  |
| 32 | 4.1537 | 298.49 | 0.0055 | 165 | → | 176 | -0.13211 |
|    |        |        |        | 166 | → | 177 | 0.14679  |
|    |        |        |        | 174 | → | 183 | 0.5141   |
|    |        |        |        | 174 | → | 185 | 0.10751  |
|    |        |        |        | 175 | → | 183 | 0.13117  |
|    |        |        |        | 175 | → | 185 | 0.32237  |
| 33 | 4.2076 | 294.67 | 0.0034 | 172 | → | 186 | 0.13022  |
|    |        |        |        | 172 | → | 189 | 0.11364  |
|    |        |        |        | 173 | → | 186 | 0.2654   |
|    |        |        |        | 173 | → | 189 | 0.21077  |
|    |        |        |        | 173 | → | 191 | 0.13192  |
|    |        |        |        | 174 | → | 184 | -0.11439 |
|    |        |        |        | 174 | → | 193 | -0.13383 |
|    |        |        |        | 175 | → | 181 | 0.1861   |
|    |        |        |        | 175 | → | 187 | 0.11952  |
|    |        |        |        | 175 | → | 188 | 0.11844  |



|    |        |        |        |     |   |     |          |
|----|--------|--------|--------|-----|---|-----|----------|
|    |        |        |        | 175 | → | 190 | -0.17481 |
|    |        |        |        | 175 | → | 193 | 0.33713  |
| 34 | 4.3017 | 288.22 | 0.0167 | 172 | → | 181 | 0.22001  |
|    |        |        |        | 172 | → | 182 | -0.12274 |
|    |        |        |        | 173 | → | 181 | 0.54102  |
|    |        |        |        | 173 | → | 182 | -0.2699  |
|    |        |        |        | 175 | → | 186 | 0.13302  |
| 35 | 4.3154 | 287.31 | 0.0012 | 169 | → | 176 | -0.25953 |
|    |        |        |        | 171 | → | 179 | -0.1773  |
|    |        |        |        | 172 | → | 180 | 0.18453  |
|    |        |        |        | 173 | → | 180 | 0.46577  |
|    |        |        |        | 174 | → | 184 | -0.26211 |
| 36 | 4.3387 | 285.76 | 0.017  | 166 | → | 176 | 0.12983  |
|    |        |        |        | 168 | → | 176 | -0.114   |
|    |        |        |        | 168 | → | 178 | -0.10036 |
|    |        |        |        | 169 | → | 176 | -0.25793 |
|    |        |        |        | 173 | → | 180 | 0.1781   |
|    |        |        |        | 174 | → | 184 | 0.52247  |
|    |        |        |        | 175 | → | 184 | -0.13207 |
| 37 | 4.3551 | 284.69 | 0.0266 | 169 | → | 177 | -0.11701 |
|    |        |        |        | 170 | → | 176 | 0.64123  |
|    |        |        |        | 174 | → | 183 | -0.10575 |
|    |        |        |        | 174 | → | 185 | -0.12926 |
|    |        |        |        | 175 | → | 185 | 0.11252  |
| 38 | 4.3847 | 282.77 | 0.0002 | 169 | → | 176 | 0.41724  |
|    |        |        |        | 170 | → | 177 | 0.42387  |
|    |        |        |        | 171 | → | 179 | -0.13404 |
|    |        |        |        | 173 | → | 180 | 0.24994  |
| 39 | 4.3873 | 282.6  | 0.0093 | 168 | → | 177 | -0.10429 |
|    |        |        |        | 169 | → | 177 | 0.23362  |
|    |        |        |        | 170 | → | 176 | 0.14591  |
|    |        |        |        | 170 | → | 178 | -0.10884 |
|    |        |        |        | 173 | → | 182 | -0.11699 |
|    |        |        |        | 174 | → | 183 | -0.1083  |
|    |        |        |        | 174 | → | 185 | 0.5352   |
|    |        |        |        | 175 | → | 185 | -0.15798 |
| 40 | 4.3925 | 282.26 | 0.0004 | 169 | → | 176 | -0.38261 |
|    |        |        |        | 170 | → | 177 | 0.52228  |
|    |        |        |        | 173 | → | 180 | -0.15848 |

**Table S20.** TDDFT calculated transitions for C-S<sub>a</sub>-mer-[Ru(DQPz)<sub>2</sub>]<sup>2+</sup>.

| Excited State | Energy (eV) | Wavelength (nm) | f      | Transitions |   |     |          |
|---------------|-------------|-----------------|--------|-------------|---|-----|----------|
| 1             | 2.5609      | 484.14          | 0.0393 | 175         | → | 176 | 0.70108  |
| 2             | 2.5837      | 479.86          | 0.0028 | 174         | → | 179 | -0.11643 |
|               |             |                 |        | 175         | → | 177 | 0.65509  |
|               |             |                 |        | 175         | → | 178 | -0.20702 |

|    |        |        |        |     |   |     |          |
|----|--------|--------|--------|-----|---|-----|----------|
| 3  | 2.7008 | 459.06 | 0.0814 | 171 | → | 177 | 0.11345  |
|    |        |        |        | 174 | → | 177 | 0.65404  |
|    |        |        |        | 175 | → | 179 | -0.20869 |
| 4  | 2.7277 | 454.53 | 0.0003 | 174 | → | 176 | -0.36106 |
|    |        |        |        | 174 | → | 179 | -0.14567 |
|    |        |        |        | 175 | → | 177 | 0.17741  |
|    |        |        |        | 175 | → | 178 | 0.54913  |
| 5  | 2.7655 | 448.32 | 0.117  | 174 | → | 176 | 0.59438  |
|    |        |        |        | 175 | → | 178 | 0.35087  |
| 6  | 2.8312 | 437.92 | 0.0363 | 174 | → | 177 | 0.15324  |
|    |        |        |        | 174 | → | 178 | -0.40905 |
|    |        |        |        | 175 | → | 179 | 0.5303   |
| 7  | 2.8842 | 429.88 | 0.1108 | 174 | → | 177 | 0.12788  |
|    |        |        |        | 174 | → | 178 | 0.53744  |
|    |        |        |        | 175 | → | 179 | 0.39873  |
| 8  | 3.0739 | 403.34 | 0.0113 | 173 | → | 177 | 0.69483  |
| 9  | 3.1214 | 397.21 | 0      | 173 | → | 176 | 0.68615  |
|    |        |        |        | 174 | → | 179 | 0.15186  |
| 10 | 3.278  | 378.23 | 0.0013 | 172 | → | 177 | -0.12019 |
|    |        |        |        | 173 | → | 176 | -0.14694 |
|    |        |        |        | 174 | → | 179 | 0.62677  |
|    |        |        |        | 175 | → | 177 | 0.14715  |
|    |        |        |        | 175 | → | 178 | 0.11292  |
| 11 | 3.2871 | 377.19 | 0.0191 | 173 | → | 178 | 0.68563  |
| 12 | 3.4129 | 363.28 | 0.0018 | 173 | → | 179 | 0.68405  |
| 13 | 3.5226 | 351.97 | 0.0838 | 171 | → | 176 | 0.16151  |
|    |        |        |        | 172 | → | 177 | 0.66457  |
|    |        |        |        | 174 | → | 179 | 0.10798  |
| 14 | 3.5272 | 351.51 | 0.3704 | 171 | → | 177 | 0.10032  |
|    |        |        |        | 172 | → | 176 | 0.67968  |
| 15 | 3.6145 | 343.02 | 0.0287 | 175 | → | 180 | 0.66674  |
|    |        |        |        | 175 | → | 182 | -0.14316 |
| 16 | 3.677  | 337.19 | 0.0235 | 171 | → | 177 | 0.59372  |
|    |        |        |        | 172 | → | 176 | -0.11943 |
|    |        |        |        | 174 | → | 177 | -0.12471 |
|    |        |        |        | 174 | → | 186 | 0.18581  |
|    |        |        |        | 174 | → | 189 | 0.17113  |
| 17 | 3.6879 | 336.19 | 0.0199 | 171 | → | 176 | 0.62466  |
|    |        |        |        | 172 | → | 177 | -0.17644 |
|    |        |        |        | 172 | → | 178 | 0.15368  |
|    |        |        |        | 174 | → | 180 | 0.13918  |
| 18 | 3.7195 | 333.34 | 0      | 171 | → | 176 | -0.21833 |
|    |        |        |        | 172 | → | 178 | 0.61795  |
|    |        |        |        | 174 | → | 180 | 0.17601  |
|    |        |        |        | 175 | → | 181 | -0.12546 |
| 19 | 3.7527 | 330.39 | 0.0043 | 174 | → | 180 | 0.47826  |

|    |        |        |        |     |   |     |          |
|----|--------|--------|--------|-----|---|-----|----------|
|    |        |        |        | 174 | → | 182 | -0.1104  |
|    |        |        |        | 175 | → | 181 | 0.44025  |
|    |        |        |        | 175 | → | 183 | -0.10886 |
|    |        |        |        | 175 | → | 186 | -0.11434 |
| 20 | 3.7536 | 330.3  | 0.0336 | 171 | → | 177 | -0.32319 |
|    |        |        |        | 171 | → | 178 | -0.26243 |
|    |        |        |        | 171 | → | 186 | 0.11958  |
|    |        |        |        | 171 | → | 189 | 0.11332  |
|    |        |        |        | 174 | → | 178 | 0.17036  |
|    |        |        |        | 174 | → | 186 | 0.33241  |
|    |        |        |        | 174 | → | 189 | 0.29786  |
|    |        |        |        | 174 | → | 191 | 0.12533  |
|    |        |        |        | 174 | → | 194 | -0.12244 |
| 21 | 3.7786 | 328.12 | 0.0079 | 172 | → | 178 | 0.25697  |
|    |        |        |        | 174 | → | 180 | -0.35794 |
|    |        |        |        | 175 | → | 181 | 0.4924   |
|    |        |        |        | 175 | → | 186 | 0.10396  |
| 22 | 3.8649 | 320.8  | 0.0087 | 171 | → | 178 | -0.11081 |
|    |        |        |        | 174 | → | 181 | -0.27195 |
|    |        |        |        | 175 | → | 180 | 0.16427  |
|    |        |        |        | 175 | → | 182 | 0.56122  |
|    |        |        |        | 175 | → | 192 | -0.12977 |
| 23 | 3.9062 | 317.41 | 0.007  | 171 | → | 178 | 0.49821  |
|    |        |        |        | 172 | → | 179 | 0.37929  |
|    |        |        |        | 174 | → | 186 | 0.14381  |
|    |        |        |        | 174 | → | 189 | 0.11175  |
|    |        |        |        | 175 | → | 182 | 0.16444  |
| 24 | 3.9193 | 316.34 | 0.0139 | 173 | → | 179 | -0.12229 |
|    |        |        |        | 173 | → | 180 | 0.10154  |
|    |        |        |        | 173 | → | 192 | 0.13071  |
|    |        |        |        | 174 | → | 180 | 0.2512   |
|    |        |        |        | 175 | → | 183 | 0.30123  |
|    |        |        |        | 175 | → | 186 | 0.39655  |
|    |        |        |        | 175 | → | 189 | 0.28302  |
|    |        |        |        | 175 | → | 191 | 0.1068   |
|    |        |        |        | 175 | → | 194 | -0.10548 |
| 25 | 3.9215 | 316.17 | 0.0142 | 171 | → | 178 | 0.18088  |
|    |        |        |        | 172 | → | 179 | -0.42616 |
|    |        |        |        | 174 | → | 181 | 0.47747  |
|    |        |        |        | 175 | → | 182 | 0.1515   |
| 26 | 3.9334 | 315.21 | 0.0305 | 171 | → | 178 | -0.30329 |
|    |        |        |        | 172 | → | 179 | 0.37224  |
|    |        |        |        | 174 | → | 181 | 0.3881   |
|    |        |        |        | 174 | → | 183 | -0.12594 |
|    |        |        |        | 174 | → | 186 | -0.14559 |
|    |        |        |        | 174 | → | 189 | -0.11244 |

|    |        |        |        |     |   |     |          |
|----|--------|--------|--------|-----|---|-----|----------|
| 27 | 4.0155 | 308.76 | 0.0009 | 175 | → | 182 | 0.18933  |
|    |        |        |        | 171 | → | 179 | -0.15409 |
|    |        |        |        | 174 | → | 182 | -0.34593 |
|    |        |        |        | 175 | → | 183 | 0.48749  |
|    |        |        |        | 175 | → | 186 | -0.19183 |
| 28 | 4.0546 | 305.79 | 0.0018 | 175 | → | 189 | -0.1308  |
|    |        |        |        | 167 | → | 178 | 0.10383  |
|    |        |        |        | 168 | → | 176 | -0.12215 |
|    |        |        |        | 174 | → | 182 | 0.48221  |
|    |        |        |        | 175 | → | 183 | 0.33229  |
| 29 | 4.093  | 302.92 | 0.0005 | 175 | → | 184 | -0.23716 |
|    |        |        |        | 175 | → | 186 | -0.12347 |
|    |        |        |        | 171 | → | 179 | 0.6114   |
|    |        |        |        | 173 | → | 180 | 0.13555  |
|    |        |        |        | 174 | → | 182 | -0.19864 |
| 30 | 4.1084 | 301.78 | 0.0044 | 175 | → | 184 | -0.15242 |
|    |        |        |        | 165 | → | 176 | -0.12391 |
|    |        |        |        | 166 | → | 177 | -0.10234 |
|    |        |        |        | 167 | → | 179 | 0.10225  |
|    |        |        |        | 168 | → | 177 | -0.11796 |
| 31 | 4.1283 | 300.33 | 0.0025 | 170 | → | 176 | 0.12175  |
|    |        |        |        | 174 | → | 183 | 0.44021  |
|    |        |        |        | 174 | → | 184 | -0.12216 |
|    |        |        |        | 175 | → | 185 | 0.39914  |
|    |        |        |        | 167 | → | 178 | -0.10358 |
| 32 | 4.1519 | 298.62 | 0.0007 | 168 | → | 176 | 0.11051  |
|    |        |        |        | 171 | → | 179 | 0.19125  |
|    |        |        |        | 173 | → | 180 | 0.1446   |
|    |        |        |        | 174 | → | 182 | 0.18208  |
|    |        |        |        | 174 | → | 185 | -0.1295  |
| 33 | 4.2031 | 294.98 | 0.0043 | 175 | → | 183 | 0.14875  |
|    |        |        |        | 175 | → | 184 | 0.5476   |
|    |        |        |        | 166 | → | 177 | 0.10016  |
|    |        |        |        | 167 | → | 176 | 0.16207  |
|    |        |        |        | 168 | → | 178 | -0.12622 |
|    |        |        |        | 173 | → | 186 | 0.10432  |
|    |        |        |        | 174 | → | 183 | -0.38908 |
|    |        |        |        | 174 | → | 184 | -0.22981 |
|    |        |        |        | 175 | → | 185 | 0.39     |
|    |        |        |        | 175 | → | 192 | 0.1231   |
|    |        |        |        | 173 | → | 186 | 0.26134  |
|    |        |        |        | 173 | → | 189 | 0.23689  |
|    |        |        |        | 174 | → | 183 | 0.17519  |
|    |        |        |        | 175 | → | 182 | 0.21895  |
|    |        |        |        | 175 | → | 185 | -0.22305 |
|    |        |        |        | 175 | → | 187 | 0.11251  |

|    |        |        |        |     |   |     |          |
|----|--------|--------|--------|-----|---|-----|----------|
|    |        |        |        | 175 | → | 188 | 0.11048  |
|    |        |        |        | 175 | → | 190 | -0.12898 |
|    |        |        |        | 175 | → | 192 | 0.32446  |
|    |        |        |        | 175 | → | 193 | -0.13902 |
| 34 | 4.2916 | 288.9  | 0.0091 | 167 | → | 176 | -0.13905 |
|    |        |        |        | 168 | → | 178 | 0.11351  |
|    |        |        |        | 173 | → | 186 | 0.10167  |
|    |        |        |        | 174 | → | 184 | 0.53708  |
|    |        |        |        | 175 | → | 182 | 0.10565  |
|    |        |        |        | 175 | → | 185 | 0.30154  |
| 35 | 4.2988 | 288.42 | 0.0006 | 166 | → | 176 | 0.10314  |
|    |        |        |        | 167 | → | 177 | 0.10142  |
|    |        |        |        | 167 | → | 178 | 0.10324  |
|    |        |        |        | 169 | → | 176 | 0.14823  |
|    |        |        |        | 173 | → | 180 | 0.27717  |
|    |        |        |        | 173 | → | 182 | -0.11723 |
|    |        |        |        | 174 | → | 185 | 0.488    |
|    |        |        |        | 175 | → | 184 | 0.1793   |
| 36 | 4.3202 | 286.99 | 0.0053 | 169 | → | 176 | 0.23872  |
|    |        |        |        | 171 | → | 179 | -0.12845 |
|    |        |        |        | 173 | → | 180 | 0.47684  |
|    |        |        |        | 174 | → | 185 | -0.31384 |
|    |        |        |        | 175 | → | 184 | -0.16851 |
| 37 | 4.3396 | 285.7  | 0.0233 | 173 | → | 181 | 0.67619  |
| 38 | 4.3675 | 283.88 | 0.0265 | 169 | → | 177 | 0.10588  |
|    |        |        |        | 170 | → | 176 | 0.65211  |
|    |        |        |        | 174 | → | 183 | -0.11063 |
| 39 | 4.3785 | 283.17 | 0.0004 | 170 | → | 177 | 0.66725  |
|    |        |        |        | 171 | → | 179 | -0.12834 |
| 40 | 4.3872 | 282.61 | 0.0095 | 169 | → | 177 | 0.6691   |
|    |        |        |        | 170 | → | 176 | -0.12461 |
